# Supplementary material for: The current provision of community-based teaching in UK medical schools: an online survey and systematic review
Source: PubMed Central journal article supplement — BMJ Open. 2014 Dec 1;4(12):e005696. doi: 10.1136/bmjopen-2014-005696 (PMC4256542; doi:10.1136/bmjopen-2014-005696), 2014-12-01
Supplement: bmjopen-2014-005696.draft_revisions.pdf [file bmjopen-2014-005696.draft_revisions.pdf]

# BMJ Open

## Community based teaching in UK medical schools: Current provision and a systematic review of studies evaluating their outcomes.

|                                                                                                                                                                                                                            |                                                                                                                                                                                                                                                           |
|----------------------------------------------------------------------------------------------------------------------------------------------------------------------------------------------------------------------------|-----------------------------------------------------------------------------------------------------------------------------------------------------------------------------------------------------------------------------------------------------------|
| Journal:                                                                                                                                                                                                                   | <i>BMJ Open</i>                                                                                                                                                                                                                                           |
| Manuscript ID:                                                                                                                                                                                                             | bmjopen-2014-005696                                                                                                                                                                                                                                       |
| Article Type:                                                                                                                                                                                                              | Research                                                                                                                                                                                                                                                  |
| Date Submitted by the Author:                                                                                                                                                                                              | 14-May-2014                                                                                                                                                                                                                                               |
| Complete List of Authors:                                                                                                                                                                                                  | Lee, Sandra; School of Medicine, University of Nottingham<br>Clement, Naomi; School of Medicine, University of Nottingham<br>Tang, Natalie; School of Medicine, University of Nottingham<br>Atiomo, William; School of Medicine, University of Nottingham |
| <b>Primary Subject Heading</b>:                                                                                                                                                                                            | Medical education and training                                                                                                                                                                                                                            |
| Secondary Subject Heading:                                                                                                                                                                                                 | General practice / Family practice, Patient-centred medicine, Health policy                                                                                                                                                                               |
| Keywords:                                                                                                                                                                                                                  | EDUCATION & TRAINING (see Medical Education & Training), MEDICAL EDUCATION & TRAINING, PRIMARY CARE                                                                                                                                                       |
| <p>Note: The following files were submitted by the author for peer review, but cannot be converted to PDF. You must view these files (e.g. movies) online.</p> <p>Table 3. Summary of Findings from Online Survey.xlsm</p> |                                                                                                                                                                                                                                                           |

SCHOLARONE™  
Manuscripts

1  
2  
3 **Community based teaching in UK medical schools: Current provision and a**  
4  
5 **systematic review of studies evaluating their outcomes.**  
6  
7

8  
9 Sandra WW Lee<sup>1</sup>, Naomi Clement (BMedSci)<sup>1</sup>, Natalie Tang (BMedSci)<sup>1</sup>, William Atiomo (DM FRCOG)<sup>2</sup>  
10

11  
12 <sup>1</sup> School of Medicine, University of Nottingham, Queen's Medical Centre, NG7 2UH, United Kingdom.  
13

14  
15 <sup>2</sup> Clinical Sub-Dean, School of Medicine, University of Nottingham, NG7 2UH United Kingdom.  
16

17  
18 *The lead author affirms that this manuscript is an honest, accurate, and transparent account of the study being*  
19 *reported; that no important aspects of the study have been omitted; and that any discrepancies from the study*  
20 *as planned (and, if relevant, registered) have been explained*  
21

22  
23  
24 Correspondence to:

25  
26 Naomi Clement

27 Email: [msxnc@nottingham.ac.uk](mailto:msxnc@nottingham.ac.uk)

28 Telephone: 0115 978 5800

29 Fax: 0115 8230759

30 For extra data please contact the above  
31  
32

33  
34 *The Corresponding Author has the right to grant on behalf of all authors and does grant on behalf of all*  
35 *authors, a worldwide licence to the Publishers and its licensees in perpetuity, in all forms, formats and media*  
36 *(whether known now or created in the future), to i) publish, reproduce, distribute, display and store the*  
37 *Contribution, ii) translate the Contribution into other languages, create adaptations, reprints, include within*  
38 *collections and create summaries, extracts and/or, abstracts of the Contribution, iii) create any other derivative*  
39 *work(s) based on the Contribution, iv) to exploit all subsidiary rights in the Contribution, v) the inclusion of*  
40 *electronic links from the Contribution to third party material where-ever it may be located; and, vi) licence any*  
41 *third party to do any or all of the above.*  
42  
43  
44  
45  
46  
47  
48  
49  
50  
51  
52  
53  
54  
55  
56  
57  
58  
59  
60

## Community based teaching in UK medical schools: Current provision and a systematic review of studies evaluating their outcomes.

Authors: Sandra WW Lee, Naomi Clement (BMedSci), Natalie Tang (BMedSci), William Atiomo (DM FRCOG)

### Abstract:

#### **Objective**

To evaluate the current provision and outcome of community based education (CBE) in UK medical schools.

#### **Design & Data Sources**

An online survey of UK medical school websites and course prospectuses and a systematic review of articles from PubMed and Web of Science were conducted. Articles in the systematic review were assessed using Rossi, Lipsey and Freeman's approach to programme evaluation.

#### **Study Selection**

Publications from November 1998 to 2013 containing information related to community teaching in undergraduate medical courses were included.

#### **Results**

Out of the 32 undergraduate UK medical schools, one was excluded due to the lack of course specifications available online. Analysis of the remaining 31 medical schools showed that a variety of CBE models are utilised in medical schools across the UK. 28 medical schools (90.3%) provide CBE in some form by the end of the first year of undergraduate training, and 29 medical schools (93.5%) by the end of the second year.

From the 1378 references identified, 29 papers met the inclusion criteria for assessment. It was found that CBE mostly provided advantages to students as well as other participants, including GP tutors and patients. However, there were a few concerns regarding the lack of GP tutor's knowledge in specialty areas, the negative impact that CBE may have on the delivery of health service in education settings and the cost of CBE.

#### **Conclusions**

Despite the wide variations in implementation, community teaching was found to be mostly beneficial. To ensure the relevance of CBE for "Tomorrow's Doctors", a national framework should be established, and solutions sought to reduce the impact of the challenges within CBE.

#### **Strengths and Limitations of this Study**

- This is the first study to review how community based education is currently provided throughout Medical Schools in the UK
- However, a weakness is that this information was obtained online from medical schools online prospectuses. This means the data may be incomplete or out of date
- The use of Rossi, Lipsey and Freeman's method of programme evaluation means that the literature was analysed in a consistent and comprehensive way

1  
2  
3  
4  
5  
6  
7  
8  
9  
10  
11  
12  
13  
14  
15  
16  
17  
18  
19  
20  
21  
22  
23  
24  
25  
26  
27  
28  
29  
30  
31  
32  
33  
34  
35  
36  
37  
38  
39  
40  
41  
42  
43  
44  
45  
46  
47  
48  
49  
50  
51  
52  
53  
54  
55  
56  
57  
58  
59  
60

For peer review only

# Community based teaching in UK medical schools: Current provision and a systematic review of studies evaluating their outcomes

## Introduction

The context of healthcare in the UK is changing, with an increasingly aging population and a growing focus on the prevention and management of disease.<sup>1</sup> This has prompted the need to ensure that medical graduates are adequately prepared to address these evolving health care needs, rather than maintaining a reactive approach to illness in the UK. These needs include the prevention and management of chronic health conditions such as diabetes, heart disease, cancer and other long-term illnesses. The promotion of health as well as the delivery of care of conditions like these often occurs within the community, outside the context of University teaching hospitals - provided by professionals from several disciplines, including a significant input from social services. In the recently published UK government's white paper, *Equity and Excellence: Liberating the NHS*,<sup>2</sup> a need for a healthcare system focused on personalised care reflecting individuals' health and care needs was outlined. This would involve supporting carers and encouraging multidisciplinary care. These social demographic and political drivers require strong input from multi-professional healthcare providers in primary care and the recruitment of more General Practitioners (GPs) in order to fulfil the growing need for community-based care.

This concept also resonates globally and is considered important by health regulatory bodies that licence medical schools. In 1987, the World Health Organisation (WHO) recommended the reform of health professional curricula by incorporating methods to prepare students for providing care at all levels of health care settings,<sup>3</sup> which can be achieved by, among other things, aligning education with community needs. The UK General Medical Council's (GMC's) document "*Tomorrow's Doctors*" recommend that clinical placements should reflect the changing patterns of healthcare and that they

1  
2  
3 must provide experience in a variety of environments including hospitals, general practices and  
4  
5 community medical services.<sup>4</sup>  
6  
7

8 Curricula in the UK medical schools, therefore, currently offer community based education (CBE) in  
9  
10 various forms and models of teaching.<sup>5</sup> Previous publications have evaluated these models of  
11  
12 medical teaching in the community, including an analysis of their advantages and drawbacks.<sup>6-28</sup>  
13

14 However, a thorough literature search (as conducted in November 2013) found no existing  
15  
16 systematic reviews on community-based teaching across all existing UK medical schools. It remains  
17  
18 unclear what the extent of community based teaching in UK medical schools is, the impact this had  
19  
20 made to the standards of healthcare, and how the effectiveness of community-based teaching  
21  
22 programmes has been measured. Knowledge of this is considered important, as it would guide the  
23  
24 structuring of undergraduate medical curricula to adapt to changing contexts in the UK, hence  
25  
26 effectively developing a future generation of doctors who are appropriately prepared for upcoming  
27  
28 health care needs. The aim of this study, therefore, was to conduct an online survey of the current  
29  
30 provision of community based teaching within UK undergraduate medical schools to appreciate the  
31  
32 extent of implementation. A systematic review was also conducted to evaluate the outcomes of  
33  
34 community based teaching in UK medical curricula.  
35  
36  
37  
38  
39  
40  
41  
42  
43  
44  
45

## 46 **Methods**

### 47 *Online Survey*

48  
49 An online survey of the current provision of community-based teaching in UK Medical Curricula was  
50  
51 completed by NC through accessing official online material of medical schools between 31st  
52  
53 November 2013 and 8th December 2013. An up-to-date list of all the registered medical schools was  
54  
55 obtained from the Medical Schools Council (MSC) website on 31st November 2013.<sup>29</sup> All graduate-  
56  
57  
58  
59  
60

1  
2  
3 entry courses were excluded. Online material of the undergraduate medical curriculum was sourced  
4  
5 using the Google search engine, and included content from university websites or online course  
6  
7 prospectuses for the 2014 intake. The information search was specific to descriptions of both  
8  
9 mandatory and elective components of the curriculum relating to “primary care”, “general practice”,  
10  
11 or “community medicine”.

### 12 13 14 *Systematic Review: Data Sources*

15  
16  
17  
18 A systematic literature review was conducted using the electronic databases PubMed and Web of  
19  
20 Science for papers published on undergraduate community-based medical education from 1998 to  
21  
22 November 2013. The search criteria was (“community-based”, “community-oriented”, “community  
23  
24 involvement”, or “primary health care”) and (“medical curriculum”, “medical students”,  
25  
26 “undergraduate medical education” or “undergraduate medical school”).

### 27 28 29 *Systemic Review: Selection criteria & Data Extraction*

30  
31  
32  
33 The relevance of the articles was screened by the title and abstract based on the inclusion and  
34  
35 exclusion criteria. Articles were selected if they described undergraduate medical education within  
36  
37 the UK. Papers that included healthcare professionals apart from medical students were excluded.  
38  
39 Any articles that were duplicated, not available in full text, or not published in English were also  
40  
41 regarded as unsuitable for the review. In total 29 peer-reviewed articles were identified as relevant,  
42  
43 and were selected for further qualitative content analysis by SL and NT (see figure 1). Data on the  
44  
45 following were extracted from each article: (1) Format of CBE; (2) Type of evaluation used to assess  
46  
47 the programme; (3) Findings of this evaluation; and (4) Method of data collection. Rossi, Lipsey and  
48  
49 Freeman’s (2004) approach to programme evaluation was adopted to systematically categorise the  
50  
51 evaluation findings on CBE (see Table 1) based on impact of CBE on students, patients and other  
52  
53 participants as well as cost and implementation of CBE.  
54  
55  
56  
57  
58  
59  
60

## Results

### *Current provision of community based teaching in UK medical schools.*

We were able to obtain information from the medical school websites about the provision of community based teaching in all 32 undergraduate medical schools, and this is outlined in Table 2 and summarised in Table 3.

All undergraduate medical schools provided some form of community-based teaching or placement. There was however variation in the structure, duration and time in the course when community teaching was delivered (see Table 2 and Table 3). Community-based education mainly took the form of clinical placements, patient studies, and optional modules. The duration of community based teaching or placements varied from half day visits to various community settings (as undertaken in schools such as Hull York, Newcastle, Nottingham and St George's) to a year-long module on primary care and population medicine (as undertaken in Brighton & Sussex).

Analysis of the varying formats of CBE (with the exclusion of Norwich, due to the lack of year-by-year curriculum details) revealed that most medical schools (a total of 31) provided early exposure to general practice or community teaching. 28 medical schools (90.3%) provide community teaching from the first year of undergraduate medical education. By the end of the second year of pre-clinical education, students of 29 medical schools (93.5%) would have received some form of community-based education.

Fourteen (45.2%) medical schools provided regular exposure to community teaching in every year or phase of the course.

### *Literature review of studies evaluating outcomes of community based teaching*



1  
2  
3 A summary of the studies evaluated in the systematic literature review are outlined in Table 4. The  
4  
5 main methods of evaluation employed in the studies were questionnaires, interviews, and focus  
6  
7 groups of the key stakeholders in CBE - students, patients, tutors and other staff in the community  
8  
9 setting.  
10

### 11 12 13 *Needs Assessment of CBE*

14  
15  
16 Studies of student expectations of CBE highlighted that students valued experiential patient-centred  
17  
18 learning and tutor supervision in the community setting.<sup>14, 30</sup> In a Sheffield study,<sup>14</sup> students also  
19  
20 recognised that CBE was a powerful vehicle for changing their approach to medicine and illness,  
21  
22 where the patient as a person is given emphasis over the disease.  
23

### 24 25 26 *Implementation Assessment of CBE*

27  
28  
29 All forms of community-based teaching were generally well-received by medical students, patients,  
30  
31 and participating health care professionals, supporting the continuation of existing community-  
32  
33 based teaching programmes in the future. This included community-based teaching which was  
34  
35 incorporated into specialty modules such as: Obstetrics and Gynaecology<sup>31</sup>, Psychiatry<sup>22</sup> and  
36  
37 Surgery<sup>27</sup>. The unique approach of incorporating primary healthcare in an intercalated Bachelor of  
38  
39 Science medical research year also received positive feedback<sup>23</sup>.  
40

41  
42  
43 Three studies found that student's preferred the implementation of practice-based teaching over  
44  
45 hospital-based teaching. Hastings *et al.* found that students in Leicester preferred practice-based  
46  
47 teaching on the grounds of both teaching method and content.<sup>11</sup> O'Sullivan *et al.* had similar findings  
48  
49 among students from University College London, where practice-based teaching bore qualities of  
50  
51 better teaching attitudes, teaching methods, and course organisation.<sup>12</sup> Interestingly, these findings  
52  
53 were consistent with Powell and Easton's investigation on Imperial College students undertaking  
54  
55 their surgery module.<sup>27</sup> These students preferred surgical teaching within general practices due to  
56  
57  
58  
59  
60

1  
2  
3 there being learner-centred teaching, more protected teaching time, and regular access to suitable  
4  
5 patients for acquiring clinical skills.  
6

7  
8 The success of community teaching in Leicester was analysed by Hastings *et al.*<sup>11</sup> It was found that  
9  
10 the improved quality of teaching by GP tutors was attributed to a higher proportion of GP tutors  
11  
12 attending teacher-training courses. General practices were also found to have greater resource  
13  
14 availability and NHS funding specifically in support of teaching medical undergraduates. All these  
15  
16 factors placed hospital doctors at a disadvantage in preparing quality clinical teaching sessions in  
17  
18 comparison to General Practitioners.  
19

## 20 21 *Impact Assessment of CBE*

### 22 23 *Impact on Students: Learning Outcomes*

24  
25  
26  
27  
28 The impact of CBE on student's in summarised in Figure 2.  
29

30  
31 Implementation of CBE in medical schools had a significant positive impact on medical students'  
32  
33 learning outcomes. The following results provide evidence to the strong educational value among  
34  
35 students: 11 studies showed that medical student's gained insight into patient-centered medicine  
36  
37 and continuity of care, which were learning outcomes that students viewed as important in their  
38  
39 education.<sup>10, 13, 17, 19-21, 23, 25-26, 28, 32</sup> This was measured quantitatively through questionnaires that  
40  
41 were administered to students, supplemented by quantitative feedback gathered from focus groups  
42  
43 and interviews.  
44

45  
46  
47 An appreciation and understanding of the role of primary care was a theme that was common to  
48  
49 four studies.<sup>20-21, 28, 32</sup> This was revealed through questionnaires, where students rated the extent of  
50  
51 their understanding of primary care and its relationship with other levels of care. Two studies  
52  
53 reported the benefit of community placements in broadening the student's awareness of teamwork  
54  
55 in multi-disciplinary teams.<sup>19, 30</sup> Another study reported the positive finding of successfully exposing  
56  
57 students to a broad and varied range of clinical problems in a community setting.<sup>33</sup>  
58  
59  
60

1  
2  
3 In comparison to hospital-based teaching, improved confidence in clinical skills and competencies  
4 was found to be a favourable outcome of CBE in four studies.<sup>10, 12, 19, 20</sup> This finding was derived from  
5 questionnaires and focus group interviews from students who had experienced CBE.  
6  
7

8  
9  
10 Two studies found no difference in academic performance between students under CBE and  
11 'traditional' hospital-based teaching.<sup>17, 20</sup> One study of students who undertook a specialty  
12 placement in Obstetrics and Gynaecology also found that there was no difference in clinical  
13 performance as rated by their tutors, and no statistically significant difference in student final  
14 clerkship grade.<sup>34</sup>  
15  
16  
17  
18

19  
20  
21 Although most evaluations produced consistent evidence on the benefits of community teaching,  
22 two studies highlighted the lack of in-depth knowledge of specialist teaching when conducted by GP  
23 tutors: the significance of this finding was measured qualitatively through student interviews,<sup>27</sup> and  
24 quantitatively through academic scores for the respective specialty module.<sup>34</sup>  
25  
26  
27  
28  
29

### 30 31 *Impact on Students: Behavioural Changes to Primary Care*

32  
33  
34 Two studies found that the implementation of CBE resulted in a reversal of negative attitudes  
35 towards primary care, and an increase of interest in General Practice as a career option among  
36 students.<sup>23, 32</sup>  
37  
38  
39

### 40 41 *Impact on Students: Traits of Future Doctors*

42  
43  
44 Studies also showed that medical graduates from curricula with increased emphasis on community-  
45 based teaching were at no disadvantage to graduates from the traditional hospital-based teaching.  
46  
47  
48  
49  
50  
51  
52  
53  
54  
55  
56  
57  
58  
59  
60  
61  
62  
63  
64  
65  
66  
67  
68  
69  
70  
71  
72  
73  
74  
75  
76  
77  
78  
79  
80  
81  
82  
83  
84  
85  
86  
87  
88  
89  
90  
91  
92  
93  
94  
95  
96  
97  
98  
99  
100  
101  
102  
103  
104  
105  
106  
107  
108  
109  
110  
111  
112  
113  
114  
115  
116  
117  
118  
119  
120  
121  
122  
123  
124  
125  
126  
127  
128  
129  
130  
131  
132  
133  
134  
135  
136  
137  
138  
139  
140  
141  
142  
143  
144  
145  
146  
147  
148  
149  
150  
151  
152  
153  
154  
155  
156  
157  
158  
159  
160  
161  
162  
163  
164  
165  
166  
167  
168  
169  
170  
171  
172  
173  
174  
175  
176  
177  
178  
179  
180  
181  
182  
183  
184  
185  
186  
187  
188  
189  
190  
191  
192  
193  
194  
195  
196  
197  
198  
199  
200  
201  
202  
203  
204  
205  
206  
207  
208  
209  
210  
211  
212  
213  
214  
215  
216  
217  
218  
219  
220  
221  
222  
223  
224  
225  
226  
227  
228  
229  
230  
231  
232  
233  
234  
235  
236  
237  
238  
239  
240  
241  
242  
243  
244  
245  
246  
247  
248  
249  
250  
251  
252  
253  
254  
255  
256  
257  
258  
259  
260  
261  
262  
263  
264  
265  
266  
267  
268  
269  
270  
271  
272  
273  
274  
275  
276  
277  
278  
279  
280  
281  
282  
283  
284  
285  
286  
287  
288  
289  
290  
291  
292  
293  
294  
295  
296  
297  
298  
299  
300  
301  
302  
303  
304  
305  
306  
307  
308  
309  
310  
311  
312  
313  
314  
315  
316  
317  
318  
319  
320  
321  
322  
323  
324  
325  
326  
327  
328  
329  
330  
331  
332  
333  
334  
335  
336  
337  
338  
339  
340  
341  
342  
343  
344  
345  
346  
347  
348  
349  
350  
351  
352  
353  
354  
355  
356  
357  
358  
359  
360  
361  
362  
363  
364  
365  
366  
367  
368  
369  
370  
371  
372  
373  
374  
375  
376  
377  
378  
379  
380  
381  
382  
383  
384  
385  
386  
387  
388  
389  
390  
391  
392  
393  
394  
395  
396  
397  
398  
399  
400  
401  
402  
403  
404  
405  
406  
407  
408  
409  
410  
411  
412  
413  
414  
415  
416  
417  
418  
419  
420  
421  
422  
423  
424  
425  
426  
427  
428  
429  
430  
431  
432  
433  
434  
435  
436  
437  
438  
439  
440  
441  
442  
443  
444  
445  
446  
447  
448  
449  
450  
451  
452  
453  
454  
455  
456  
457  
458  
459  
460  
461  
462  
463  
464  
465  
466  
467  
468  
469  
470  
471  
472  
473  
474  
475  
476  
477  
478  
479  
480  
481  
482  
483  
484  
485  
486  
487  
488  
489  
490  
491  
492  
493  
494  
495  
496  
497  
498  
499  
500  
501  
502  
503  
504  
505  
506  
507  
508  
509  
510  
511  
512  
513  
514  
515  
516  
517  
518  
519  
520  
521  
522  
523  
524  
525  
526  
527  
528  
529  
530  
531  
532  
533  
534  
535  
536  
537  
538  
539  
540  
541  
542  
543  
544  
545  
546  
547  
548  
549  
550  
551  
552  
553  
554  
555  
556  
557  
558  
559  
560  
561  
562  
563  
564  
565  
566  
567  
568  
569  
570  
571  
572  
573  
574  
575  
576  
577  
578  
579  
580  
581  
582  
583  
584  
585  
586  
587  
588  
589  
590  
591  
592  
593  
594  
595  
596  
597  
598  
599  
600  
601  
602  
603  
604  
605  
606  
607  
608  
609  
610  
611  
612  
613  
614  
615  
616  
617  
618  
619  
620  
621  
622  
623  
624  
625  
626  
627  
628  
629  
630  
631  
632  
633  
634  
635  
636  
637  
638  
639  
640  
641  
642  
643  
644  
645  
646  
647  
648  
649  
650  
651  
652  
653  
654  
655  
656  
657  
658  
659  
660  
661  
662  
663  
664  
665  
666  
667  
668  
669  
670  
671  
672  
673  
674  
675  
676  
677  
678  
679  
680  
681  
682  
683  
684  
685  
686  
687  
688  
689  
690  
691  
692  
693  
694  
695  
696  
697  
698  
699  
700  
701  
702  
703  
704  
705  
706  
707  
708  
709  
710  
711  
712  
713  
714  
715  
716  
717  
718  
719  
720  
721  
722  
723  
724  
725  
726  
727  
728  
729  
730  
731  
732  
733  
734  
735  
736  
737  
738  
739  
740  
741  
742  
743  
744  
745  
746  
747  
748  
749  
750  
751  
752  
753  
754  
755  
756  
757  
758  
759  
760  
761  
762  
763  
764  
765  
766  
767  
768  
769  
770  
771  
772  
773  
774  
775  
776  
777  
778  
779  
780  
781  
782  
783  
784  
785  
786  
787  
788  
789  
790  
791  
792  
793  
794  
795  
796  
797  
798  
799  
800  
801  
802  
803  
804  
805  
806  
807  
808  
809  
810  
811  
812  
813  
814  
815  
816  
817  
818  
819  
820  
821  
822  
823  
824  
825  
826  
827  
828  
829  
830  
831  
832  
833  
834  
835  
836  
837  
838  
839  
840  
841  
842  
843  
844  
845  
846  
847  
848  
849  
850  
851  
852  
853  
854  
855  
856  
857  
858  
859  
860  
861  
862  
863  
864  
865  
866  
867  
868  
869  
870  
871  
872  
873  
874  
875  
876  
877  
878  
879  
880  
881  
882  
883  
884  
885  
886  
887  
888  
889  
890  
891  
892  
893  
894  
895  
896  
897  
898  
899  
900  
901  
902  
903  
904  
905  
906  
907  
908  
909  
910  
911  
912  
913  
914  
915  
916  
917  
918  
919  
920  
921  
922  
923  
924  
925  
926  
927  
928  
929  
930  
931  
932  
933  
934  
935  
936  
937  
938  
939  
940  
941  
942  
943  
944  
945  
946  
947  
948  
949  
950  
951  
952  
953  
954  
955  
956  
957  
958  
959  
960  
961  
962  
963  
964  
965  
966  
967  
968  
969  
970  
971  
972  
973  
974  
975  
976  
977  
978  
979  
980  
981  
982  
983  
984  
985  
986  
987  
988  
989  
990  
991  
992  
993  
994  
995  
996  
997  
998  
999  
1000

1  
2  
3 their medical knowledge on disease processes.<sup>20,28</sup> However, there was no evident difference found  
4  
5 in comparison to graduates of 'traditional' programmes of old medical curricula which had no CBE  
6  
7 component when measured by academic results and feedback from educational supervisors.<sup>20,28</sup>  
8  
9

### 10 *Impact on Others Involved in CBE Programme*

11  
12  
13 Other than student outcomes, CBE also had an impact on participating doctors, staff, patients and  
14  
15 medical schools. This is summarised in Figure 3.  
16  
17

18  
19 In three studies, it was found that GP tutors and participating staff had both role satisfaction and  
20  
21 development of professional and personal ethics<sup>7,13,24</sup> Grant and Robling also found strengthened  
22  
23 team ethics between members of the primary health care team.<sup>24</sup>  
24  
25

26  
27 Doctors and staff, however, were found to have organisational issues in juggling community-  
28  
29 teaching with practice commitments. The expense of one over the other was described in CBE  
30  
31 implemented by the University of Birmingham.<sup>7</sup> The unfavourable outcome of blurred boundaries in  
32  
33 the doctor-patient relationship was also reported as a concern in two studies.<sup>18,22</sup>  
34

35  
36 Five studies evaluated the positive patient outcomes of CBE: Four of these studies reported the  
37  
38 beneficial sense of empowerment that patients gained from participating in community teaching.<sup>9,</sup>  
39  
40 <sup>21-22, 24</sup> The remaining study reported that patients developed feelings of altruism from helping  
41  
42 medical students in their education.<sup>18</sup>  
43

44  
45 Apart from gaining a sense of empowerment, Walters *et al.* also reported the development of a  
46  
47 more balanced doctor-patient relationship, and a therapeutic benefit for the patients as a result of  
48  
49 talking to students about their medical condition.<sup>22</sup>  
50

51  
52 Among these five studies on patient outcomes, two studies included further evaluations on the  
53  
54 negative impact that resulted from patient participation. The negative outcomes comprised of  
55  
56 reinforced feelings of ill-health which may be distressing or anxiety-provoking, and concerns of  
57  
58 breaching patient confidentiality.<sup>18,22</sup>  
59  
60

1  
2  
3 Powel *et al's* evaluation also shed light on the benefits that medical schools gained from tapping into  
4  
5 teaching within the community. By doing so, medical schools were able to increase the availability of  
6  
7 learning opportunities to medical students.<sup>27</sup>  
8  
9

10 Two studies raised the possibility of the negative impact that CBE would have on hospital tutors.<sup>7,13</sup>

11  
12 The concern raised in these studies was with regards to a shift of focus from teaching conducted by  
13  
14 hospital-based tutors towards an emphasis on community-based education.  
15  
16

### 17 *Cost Assessment of CBE*

18  
19  
20 Only one study evaluated the costs of running a community-based course. An evaluation of a CBE in  
21  
22 Cambridge revealed that the programme was cost-feasible since the total expenditure on one  
23  
24 student-year of community-based teaching was within the cost estimates of Service Increment for  
25  
26 Teaching (SIFT) funding.<sup>17</sup> The study also noted that the balance between placement costs and  
27  
28 facilities costs stood at a ratio of approximately 2:1, which is a reverse of the traditionally allocated  
29  
30 1:4 ratio in SIFT funds. This finding implied that the traditional allocations for SIFT funds would be  
31  
32 inappropriate when applied to community-based teaching.  
33  
34  
35  
36  
37

### 38 **Discussion**

39  
40 This study was conducted to analyse the current provision of community-based education across  
41  
42 undergraduate medical schools in the UK. All medical schools were found to offer some community  
43  
44 based teaching in their curricula, which falls in line with the recommendations of the WHO and the  
45  
46 GMC as well as following the social demographic and political changes within the UK.  
47  
48  
49

50 In general, community-based teaching was well-received by medical students due to its good  
51  
52 educational value on many levels of learning outcomes. It also gave students insight into the option  
53  
54 of General Practice as a future career. This is consistent with the direction of travel the UK  
55  
56 healthcare workforce needs to address due to the changing demographics and the emphasis  
57  
58  
59  
60

1  
2  
3 changing in health care delivery from management to prevention. Not only was community-based  
4  
5 teaching of value to students, but it was also found to produce medical graduates of equal clinical  
6  
7 skills and competencies to their counterparts who were taught under the 'traditional' hospital-based  
8  
9 medical programme.<sup>17,33</sup> This outcome is consistent with findings in Australian medical schools  
10  
11 which showed that students generally did as well as or, in some areas of clinical competencies, even  
12  
13 better than their counterparts who received hospital-based teaching<sup>7</sup>. Community-based teaching  
14  
15 in medicine was also beneficial to medical schools in maximising the sources of available learning  
16  
17 opportunities for medical students.<sup>27</sup> Moreover, community-based teaching in medicine was found  
18  
19 to offer a unique opportunity to foster inter-professional learning – an outcome that is consistent  
20  
21 with the political drivers for better patient care.<sup>35</sup>  
22  
23  
24  
25

26  
27 Although it was evident that community-based teaching has a vast array of benefits, several  
28  
29 drawbacks were identified and underscored as challenges to the implementation of CBE. Studies  
30  
31 reflected the challenges of general practice tutors lacking adequate knowledge in specialty areas,<sup>27</sup>  
32  
33 and community teaching having a negative impact on the delivery of health service in some general  
34  
35 practices.<sup>7</sup> Murray and Modell discuss possible solutions to these issues, such as the development of  
36  
37 university-linked practices that would scrutinise the effectiveness of teaching.<sup>38</sup> It is imperative that  
38  
39 these solutions are explored and tested in current CBE programmes so that the impact of  
40  
41 programme drawbacks may be reduced. This would be the way-forward to strengthening the  
42  
43 implementation of CBE in medical curricula.  
44  
45

46  
47 An assortment of models were seen to be used for community-based teaching in the UK, where  
48  
49 programmes varied in their methods of delivery, durations of exposure and points of undergraduate  
50  
51 education at which the teaching was delivered. This is congruous with guidance from the GMC  
52  
53 publication "Tomorrow's Doctors", which states that it was for each medical school to design its own  
54  
55 curriculum to suit its own circumstance. Unfortunately, the diversification of CBE poses a challenge  
56  
57 for developing a standardised set of criteria for evaluating the outcomes of CBE. Consequently, it  
58  
59  
60

1  
2  
3 becomes difficult to establish a national framework for quality assurance of medical curricula, and to  
4  
5 make recommendations for improving the implementation of CBE.  
6

7  
8 In order to achieve the expectations laid out for “Tomorrow’s Doctors”,<sup>4</sup> there is a principal need to  
9  
10 define the competencies that are required to prevent illness and promote health in the primary care  
11  
12 or community based setting. Ladhani *et al.*, for example, categorised six themes of community-based  
13  
14 education competencies within nursing and medicine: Public health; Cultural diversity; Leadership  
15  
16 and management; Community development and advocacy; Research and evidence based practice;  
17  
18 and Generic competencies.<sup>36</sup> Subsequently, a national framework may be derived from these key  
19  
20 competencies so as to measure the effectiveness of community-based teaching in achieving these  
21  
22 targeted goals.  
23

24  
25 The development of a national framework was explored and suggested by Cotton *et al.*,<sup>37</sup> where a  
26  
27 list of criteria for quality practice-based teaching in the UK was consensually derived from views of  
28  
29 medical educators and students at a national conference. However, since its development, there has  
30  
31 been no literature found on the use of these criteria to objectively evaluate community-based  
32  
33 education at a local, regional or national level. More work in this area should be encouraged to  
34  
35 achieve a national standard for community-based education in the UK.  
36

37  
38 Little data was found on the cost implications of community-based teaching. Given the wide  
39  
40 variations in the format of CBE programmes conducted across the UK, it is difficult to make general  
41  
42 conclusions about the cost impact of community-based teaching. Nonetheless the findings from  
43  
44 Oswald *et al.*'s study sets a benchmark for other similar community teaching within the UK.<sup>17</sup> Oswald  
45  
46 *et al.* found that the absolute costs per student session of community teaching was within the  
47  
48 budgets of SIFT funding. The cost-feasibility implied in this study is consistent with Murray *et al.*'s  
49  
50 1993 study of the University College London teaching programme,<sup>38</sup> where community teaching cost  
51  
52 £60 per student session, comparing well with the SIFT provision of £64 per student session.  
53  
54 However, Oswald *et al.* discusses that the national formula for SIFT funds is inappropriate for  
55  
56 community teaching due to a mismatch in the 2:1 ratio of placement costs and facilities costs in  
57  
58  
59  
60

1  
2  
3 community teaching, versus the traditionally allotted 1:4 SIFT ratio between placement costs and  
4 facilities costs. SIFT funding to medical education institutions is traditionally divided to cater for the  
5 costs of clinical placements (about 20%) and the costs of facilities (80%). The 1995 Winyard Report  
6 specified that the use of SIFT funding would support teaching conducted in settings other than the  
7 main university hospital, such as in general practices and community settings.<sup>39</sup> This report  
8 unfortunately failed to realise the inappropriateness of applying the 1:4 formula (for facilities and  
9 placement costs) in the context of primary care. The allocation of 80% SIFT funding to facilities  
10 would be disadvantageous to community-based teaching since this money will be retained for usage  
11 within the hospital setting. It is important that the provision of SIFT funding is reconsidered so that it  
12 suits a growing emphasis of community-based education in the medical curriculum and therefore  
13 help develop these settings as centres of education.  
14  
15

16  
17  
18  
19  
20  
21  
22  
23  
24  
25  
26  
27 The strengths of our study are that it provides the most up-to-date picture of the UK landscape of  
28 community based teaching in medical schools and the fact that the literature review was conducted  
29 in a systematic way. The use of Rossi, Lipsey and Freeman's widely accepted approach to  
30 programme evaluation also ensured that programme evaluations in the literature were analysed  
31 comprehensively. The weaknesses are that the online survey relied on data provided on the  
32 websites of medical schools which can occasionally be out of date and not complete. The online  
33 survey also had the disadvantage of inconsistency in the extent of details provided online. For  
34 example, the online sources may not have mentioned details on clinical placements which are  
35 primarily hospital-based, but also provide supplementary clinical teaching within the community  
36 setting, (e.g. shadowing of a community midwife in an Obstetrics & Gynaecology placement). To  
37 address these weaknesses, the method of information collection may be improved by contacting  
38 course administrators to obtain detailed information on any community-based teaching that is  
39 offered to students in all the course modules.  
40  
41  
42  
43  
44  
45  
46  
47  
48  
49  
50  
51  
52  
53  
54  
55  
56  
57  
58  
59  
60



## Conclusion

In this study, all undergraduate medical schools in the UK were seen to be offering some form of community-based teaching in their medical curriculum. The delivery of CBE varied broadly, but all forms of community teaching were generally found to be beneficial and was therefore well-received by students, patients, participating staff, and medical schools. The challenges and cost issues of community teaching should also not be overlooked, and solutions to address these need to be explored such that the delivery of CBE may be improved.

Under the pressures of social demographics and political drivers to incorporate more community-based teaching in medical education, there is a need to ensure that CBE is delivered at acceptable quality standards for it to achieve its anticipated benefits. A national framework would need to be established to ensure these standards are met. This would then succeed to act as a standardised national guideline for evaluating the effectiveness of CBE programmes in developing professional competencies that are expected of “Tomorrow’s Doctors”.

## Competing Interests

We have read and understood BMJ policy on declaration of interests and declare that we have no competing interests.

## Authors’ Contributions

WA came up with the concept of the study, NC performed the Medical School online survey and SL and NT the Literature Review. SL, NC and NT wrote the draft of the manuscript and editing was performed by SL, NC, NT and WA.

## References

<sup>1</sup>*Our Priorities for 2013/14* [Internet]. London: Public Health England; [Updated 26 April 2013, Accessed January 2014]. Available from: <https://www.gov.uk/government/publications/public-health-englands-priorities-for-2013-to-2014>

1  
2  
3 <sup>2</sup> *Equity and Excellence: Liberating the NHS* [Internet]. London: Department of Health; [Updated July  
4 2010, Accessed January 2014]. Available from:

5  
6 <https://www.gov.uk/government/publications/liberating-the-nhs-white-paper>  
7

8  
9 <sup>3</sup> *Community Based Education of Health Personnel: Report of a WHO Study Group* [Internet]. Geneva:  
10 World Health Organisation; [Updated November 1987. Accessed January 2014]. Available from:  
11 <http://apps.who.int/iris/handle/10665/41714>  
12

13  
14 <sup>4</sup> *Tomorrow's Doctors* [Internet]. London: General Medical Council; [Updated 2009, Accessed January  
15 2014]. Available from: [http://www.gmc-](http://www.gmc-uk.org/education/undergraduate/tomorrows_doctors_2009.asp)  
16 [uk.org/education/undergraduate/tomorrows\\_doctors\\_2009.asp](http://www.gmc-uk.org/education/undergraduate/tomorrows_doctors_2009.asp)  
17  
18

19  
20 <sup>5</sup> Major SC, Booton P. Involvement of general practice (family medicine) in undergraduate medical  
21 education in the United Kingdom. *J Ambul Care Manage* 2008 September;31(3):269-75.  
22

23  
24 <sup>6</sup> Davison H, Capewell S, Macnaughton J, Murray S, Hanlon P, McEwen J. Community-oriented  
25 medical education in Glasgow: developing a community diagnosis exercise. *Med Educ* 1999  
26 January;33(2):55-62.  
27

28  
29  
30 <sup>7</sup> Parle J, Greenfield S, Thomas C, Ross N, Lester H, Skelton J, *et al*. Community-based clinical  
31 education at the University of Birmingham Medical School. *Acad Med* 1999 March;74(3):248-53.  
32

33  
34 <sup>8</sup> Seabrook MA, Lempp H, Woodfield SJ. Extending community involvement in the medical  
35 curriculum: lessons from a case study. *Med Educ* 1999 November;33(11):838-45.  
36

37  
38 <sup>9</sup> Stacy R, Spencer J. Patients as teachers: a qualitative study of patients' views on their role in a  
39 community-based undergraduate project. *Med Educ* 1999 September; 33(9):688-94.  
40

41  
42 <sup>10</sup> Thistlethwaite JE, Jordan JJ. Patient-centred consultations: a comparison of student experience  
43 and understanding in two clinical environments. *Med Educ* 1999 September;33(9):678-85.  
44

45  
46 <sup>11</sup> Hastings AM, Fraser RC, McKinley RK. Student perceptions of a new integrated course in clinical  
47 methods for medical undergraduates. *Med Educ* 2000 February;34(2):101-7.  
48

49  
50 <sup>12</sup> O'Sullivan M, Martin J, Murray E. Students' perceptions of the relative advantages and  
51 disadvantages of community-based and hospital-based teaching: a qualitative study. *Med Educ* 2000  
52 August;34(8):648-55.  
53  
54  
55  
56  
57  
58  
59  
60

1  
2  
3  
4  
5  
6  
7  
8  
9  
10  
11  
12  
13  
14  
15  
16  
17  
18  
19  
20  
21  
22  
23  
24  
25  
26  
27  
28  
29  
30  
31  
32  
33  
34  
35  
36  
37  
38  
39  
40  
41  
42  
43  
44  
45  
46  
47  
48  
49  
50  
51  
52  
53  
54  
55  
56  
57  
58  
59  
60

<sup>13</sup> Thistlethwaite JE. Introducing community-based teaching of third year medical students: outcomes of a pilot project one year later and implications for managing change. *Educ Health* 2000;13(1):53-62.

<sup>14</sup> Howe A. Patient-centred medicine through student-centred teaching: a student perspective on the key impacts of community-based learning in undergraduate medical education. *Med Educ* 2001 July;35(7):666-72.

<sup>15</sup> Howe A, Ives G. Does community-based experience alter career preference? New evidence from a prospective longitudinal cohort study of undergraduate medical students. *Med Educ* 2001 April;35(4):391-7.

<sup>16</sup> Murray E, Alderman P, Coppola W, Grol R, Bouhuijs P, van der Vleuten C. What do students actually do on an internal medicine clerkship? A log diary study. *Med Educ* 2001 December;35(12):1101-7.

<sup>17</sup> Oswald N, Alderson T, Jones S. Evaluating primary care as a base for medical education: the report of the Cambridge Community-based Clinical Course. *Med Educ* 2001 August;35(8):782-8.

<sup>18</sup> Coleman K, Murray E. Patients' views and feelings on the community-based teaching of undergraduate medical students: a qualitative study. *Fam Pract* 2002 April;19(2):183-8.

<sup>19</sup> Gavin J, Lempp H, Elliman A, Grogan C. Teaching in partnership: linking a medical school and a community trust. *Br J Community Nurs* 2002 January;7(1):32-6.

<sup>20</sup> Jones A, McArdle PJ, O'Neill PA. Perceptions of how well graduates are prepared for the role of pre-registration house officer: a comparison of outcomes from a traditional and an integrated PBL curriculum. *Med Educ* 2002 January;36(1):16-25.

<sup>21</sup> Anderson ES, Lennox AI, Petersen SA. Learning from lives: a model for health and social care education in the wider community context. *Med Educ* 2003 January;37(1):59-68.

<sup>22</sup> Walters K, Buszewicz M, Russell J, Humphrey C. Teaching as therapy: cross sectional and qualitative evaluation of patients' experiences of undergraduate psychiatry teaching in the community. *BMJ* 2003 April;326(7392):740.

<sup>23</sup> Jones M, Singh S, Lloyd M. "It isn't just consultants that need a BSc": student experiences of an Intercollegiate BSc in primary health care. *Med Teach* 2005 March;27(2):164-8.

- 1  
2  
3  
4  
5  
6  
7  
8  
9  
10  
11  
12  
13  
14  
15  
16  
17  
18  
19  
20  
21  
22  
23  
24  
25  
26  
27  
28  
29  
30  
31  
32  
33  
34  
35  
36  
37  
38  
39  
40  
41  
42  
43  
44  
45  
46  
47  
48  
49  
50  
51  
52  
53  
54  
55  
56  
57  
58  
59  
60
- <sup>24</sup> Grant A, Robling M. Introducing undergraduate medical teaching into general practice: an action research study. *Med Teach* 2006 November;28(7):192-7.
- <sup>25</sup> Muir F. Placing the patient at the core of teaching. *Medical Teacher* 2007 March;29(2-3):258-260.
- <sup>26</sup> Mullen K, Nicolson M, Cotton P. Improving medical students' attitudes towards the chronic sick: a role for social science research. *BMC Med Educ* 2010 November;10:84.
- <sup>27</sup> Powell S, Easton G. Student perceptions of GP teachers' role in community-based undergraduate surgical education: a qualitative study. *JRSM Short Rep* 2012 August;3(8):51.
- <sup>28</sup> Watmough S. An evaluation of the impact of an increase in community-based medical undergraduate education in a UK medical school. *Educ Prim Care* 2012 November;23(6):385-90.
- <sup>29</sup> UK medical schools A-Z [Internet]. London: Medical Schools Council; [Accessed November 2013]. Available from: <http://www.medschools.ac.uk/Students/UKMedicalSchools/Pages/UK-Medical-Schools-A-Z.aspx>
- <sup>30</sup> Lennox A, Petersen S. Development and evaluation of a community based, multiagency course for medical students: descriptive survey. *BMJ* 1998 February;316:596-599.
- <sup>31</sup> Nicholson S, Osonnaya C, Carter Yh, Savage W, Hennessy E, Collinson S. Designing a community-based fourth-year obstetrics and gynaecology module: an example of innovative curriculum development. *Med Educ* 2001 April;35(4):398-403.
- <sup>32</sup> Sinclair HK, Ritchie LD, Lee AJ. A future career in general practice? A longitudinal study of medical students and pre-registration house officers. *Eur J Gen Pract* 2006 April;12(3):120-7.
- <sup>33</sup> Alderson TS, Oswald NT. Clinical experience of medical students in primary care: use of an electronic log in monitoring experience and in guiding education in the Cambridge Community Based Clinical Course. *Med Educ* 1999 June;33(6):429-33.
- <sup>34</sup> Frattarelli LC, Kamemoto LE. Obstetrics and gynecology medical student outcomes: Longitudinal multispecialty clerkship versus traditional block rotations. *Am J Obstet Gynecol* 2004 November;191(5):1800-1804.
- <sup>35</sup> Hosny S, Kamel MH, El-Wazir Y, Gilbert J. Integrating interprofessional education in community-based learning activities: case study. *Med Teach* 2013;35:S68-73
- <sup>36</sup> Ladhani Z, Scherpbier AJ, Stevens FC. Competencies for undergraduate community-based education for the health professions--a systematic review. *Med Teach* 2012;34(9):733-43.

1  
2  
3 <sup>37</sup>Cotton P, Sharp D, Howe A, Starkey C, Laue B, Hibble A, *et al.* Developing a set of quality criteria for  
4 community-based medical education in the UK. *Educ Prim Care*. 2009 May;20(3):143–51.  
5  
6

7 <sup>38</sup>Murray E, Jinks V, Modell M. Community-based medical education: feasibility and cost. *Med Educ*  
8 1995 January;29(1):66-71.  
9

10 <sup>39</sup>NHS Executive. SIFT into the Future. Leeds: NHS Executive, 1995 (The Winyard Report).  
11  
12

13  
14  
15  
16  
17  
18 **Legend of figures and tables.**  
19

20 Figure 1. Flow chart of search strategy used in systematic review  
21

22  
23 Figure 2. Key Points: Impact of CBE on Students  
24

25  
26 Figure 3. Key Points: Impact of CBE on Other Participants in CBE  
27

28  
29 Table 1. Domains in Rossi, Lipsey and Freeman's approach to Programme Evaluation  
30

31  
32 Table 2. Community Based Teaching in Medical Schools in the UK  
33

34  
35 Table 3. Summary of Findings from Online Survey  
36

37  
38 Table 4. Summary of Systematic Review  
39  
40  
41  
42  
43  
44  
45  
46  
47  
48  
49  
50  
51  
52  
53  
54  
55  
56  
57  
58  
59  
60

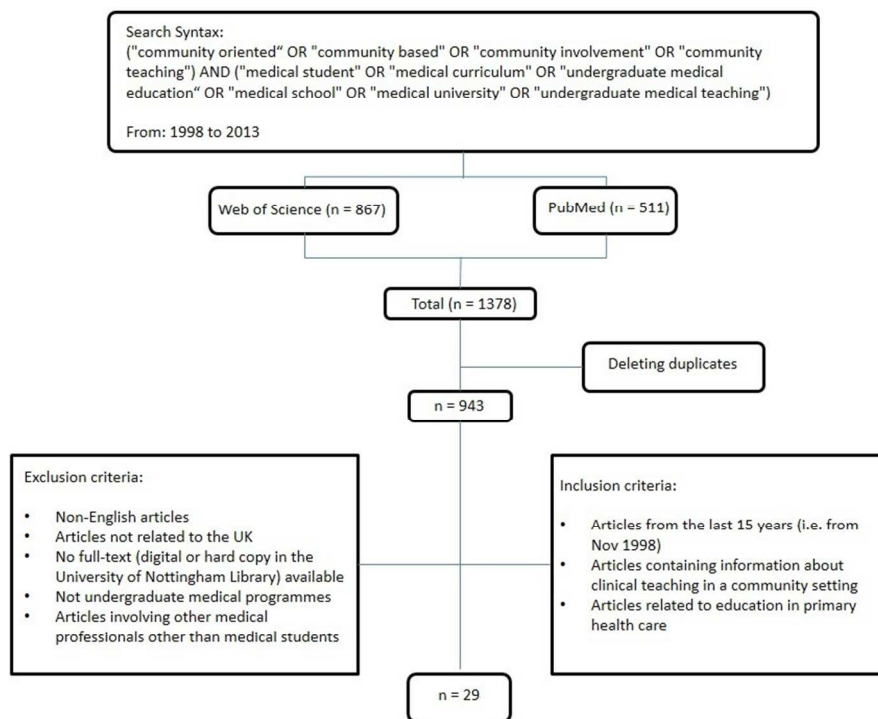

Figure 1  
Flow chart of search strategies used in systematic review  
254x190mm (96 x 96 DPI)

**KEY POINTS: IMPACT OF CBE ON STUDENTS****LEARNING OUTCOMES**

- Insight into patient-centred medicine and continuity of care
- Appreciation of the role of primary care
- Appreciation of multi-disciplinary teams
- Confidence in clinical skills and competencies
- No difference in academic performance (in comparison to hospital-based teaching)
- Teaching on a broad range of common illnesses

**BEHAVIOURAL CHANGE**

- Gained interest in GP as a career

**TRAITS OF FUTURE DOCTORS**

- No difference in professional performance as doctors
- Graduates from CBE had increased confidence in clinical skills and competencies

Figure 2  
Key points: Impact of CBE on Students  
266x172mm (137 x 132 DPI)

**KEY POINTS: IMPACT OF CBE ON OTHER PARTICIPANTS IN CBE****IMPACT ON GP TUTORS**

- Increased satisfaction; professional and personal development
- Teaching would be at the expense of practice commitments

**IMPACT ON PATIENTS**

- Sense of empowerment, a sense of balance in the doctor-patient relationship, and therapeutic benefit
- Some patients may react negatively to participation
- Concerns of breaching patient confidentiality

**IMPACT ON MEDICAL SCHOOL**

- Able to create more learning opportunities for students

**IMPACT ON HOSPITAL TUTORS**

- Decreased focus on hospital-based teaching

Figure 3  
Key Points: Impact of CBE on Other Participants in CBE  
244x159mm (149 x 144 DPI)



**Table1: Domains in Rossi, Lipsey and Freeman’s Approach to Programme Evaluation**

| Domains of Programme Evaluation                                      |                                                                                                         |
|----------------------------------------------------------------------|---------------------------------------------------------------------------------------------------------|
| Needs Assessment                                                     | Examining the need in the population that the programme intends to target.                              |
| “Logic Model” Assessment (of programme conceptualisation and design) | Examining the plausibility of how the programme is supposed to achieve its aims.                        |
| Implementation Assessment                                            | Evaluation determines whether the programme addresses its target population with the intended services. |
| Impact Assessment                                                    | Determines the effectiveness of the programme in achieving its intended outcomes.                       |
| Efficiency assessment                                                | Analyses the cost-benefit or cost-effectiveness of the programme by comparing its benefits and costs.   |

TABLE 2: An Outline Of Community-Based Teaching In Undergraduate Medical Courses Within The UK

|    |                                                                                                |                                                                                                                                                                                                                                                                                                                                                                                                                                                                                                                                                                                                                                                                                                                                   |
|----|------------------------------------------------------------------------------------------------|-----------------------------------------------------------------------------------------------------------------------------------------------------------------------------------------------------------------------------------------------------------------------------------------------------------------------------------------------------------------------------------------------------------------------------------------------------------------------------------------------------------------------------------------------------------------------------------------------------------------------------------------------------------------------------------------------------------------------------------|
| 1  | <b>Aberdeen (University of)</b>                                                                | <p><b>Year 1</b> –The "Community Course": including GP, Public Health, Mental Health, Environmental &amp; Occupational Medicine, HCE and Paediatrics; allowing learning about the social, economic and environmental impacts on health.</p> <p><b>Year 2</b> - The Community Course continues.</p> <p><b>Year 3</b> – The Community Course is completed.</p> <p><b>Year 4</b> - 5 week GP placement</p> <p><b>Year 5</b> – 8-week blocks of: (1) a medical speciality, (2) a surgical speciality, (3) a GP or psychiatry course, (4) an elective, and (5) a Professional Practice Block.</p>                                                                                                                                      |
| 2  | <b>Barts and The London School of Medicine and Dentistry, Queen Mary, University of London</b> | <p><b>Years 1 &amp; 2</b> - regular GP placements</p> <p><b>Years 3 &amp; 4</b> – work with clinical teams both in the hospital and also within community placements.</p> <p><b>Year 5</b> - clinical and community placements, including GP surgeries.</p>                                                                                                                                                                                                                                                                                                                                                                                                                                                                       |
| 3  | <b>Birmingham (University of)</b>                                                              | <p><b>Years 1 &amp; 2</b> - 10 days per year spent in GP.</p> <p><b>Year 3</b> –Community Based Medicine module</p> <p><b>Years 4 &amp; 5</b> -- One GP attachment within these 2 years.</p>                                                                                                                                                                                                                                                                                                                                                                                                                                                                                                                                      |
| 4  | <b>Brighton and Sussex Medical School</b>                                                      | <p><b>Years 1 &amp; 2</b> - 25% of learning is clinically based including experience in primary care, community medicine and out-patient settings. Patients do two family studies: One in year 1 ("family with a new baby"), and one in year 2 ("the chronic illness patient").</p> <p><b>Years 3 &amp; 4</b> – A year-long module on primary care and population medicine, alongside clinical placements both in hospital trusts and primary care.</p>                                                                                                                                                                                                                                                                           |
| 5  | <b>Bristol (University of)</b>                                                                 | <p><b>Year 1</b> - GP and patient home visits.</p> <p><b>Year 2</b> – clinical skills teaching in the primary care setting.</p> <p><b>Year 3</b> - teaching in both hospitals and in general practice.</p> <p><b>Year 4</b> - Two "Community Orientated Medical Practice" modules.</p> <p><b>Year 5</b> - 2 weeks in a GP placement (within preparation for Professional Practice)</p>                                                                                                                                                                                                                                                                                                                                            |
| 6  | <b>Cambridge (University of)</b>                                                               | <p><b>Years 1</b> – meet patients in the GP.</p> <p><b>Years 2 &amp; 3</b> – Students meet patients through visiting community-based health-related agencies, as well as following a pregnant women and her family throughout pregnancy (Year 3 project). Students also have primary care teaching in the following:</p> <ul style="list-style-type: none"> <li>- Module on the "Clinical Method" involves time spent in primary care, including teaching</li> <li>- Module on "The Life Course" involves time spent in primary and community care. Learning is focused on how diseases present, are managed and the patients' perspective.</li> <li>- Module on "Preparation for Practice" involves one GP attachment</li> </ul> |
| 7  | <b>Cardiff University</b>                                                                      | <p><b>Year 1</b> –12 week introductory programme involving short clinical experience days in GP .</p> <p><b>Years 1 &amp; 2</b> – one day a week seeing patients in hospitals, GP or other community based services.</p> <p><b>Year 5</b> - 8 week placement in the community.</p>                                                                                                                                                                                                                                                                                                                                                                                                                                                |
| 8  | <b>Dundee (University of)</b>                                                                  | <p>"Doctors, Patients and Communities" course runs throughout the undergraduate medical programme, allowing early patient contact. This course includes public health and primary care. Students submit a record of clinical experience.</p> <p><b>Years 4 &amp; 5</b> – Primary care attachments, with an option to extend the 5<sup>th</sup> year primary care attachment to 2 or 3 months.</p>                                                                                                                                                                                                                                                                                                                                 |
| 9  | <b>Durham (University of)</b>                                                                  | <p><b>Years 1 &amp; 2</b> – Community-based teaching in:</p> <ul style="list-style-type: none"> <li>- The "Patient Study" module involves observing the effect of a chronic condition on a person and their immediate family in primary care and the community.</li> <li>- The "Family Project" follows a pregnant woman and then the effect of having a new baby in a family.</li> <li>- The "Community Placement" with a variety of health and social care agencies, observing inter-professional and inter-agency working within the community. It may involve visiting patients at home and within primary care</li> </ul> <p><b>Years 3-5</b> – <i>Medical programme completed at Newcastle University</i></p>               |
| 10 | <b>Edinburgh (The University of)</b>                                                           | <p><b>Years 1 &amp; 2</b> – Student have community projects, GP-based teaching and three student selected projects on a range of topics (can be clinical and non-medical)</p> <p><b>Years 3 &amp; 4</b> - "Further clinical experience" (<i>clinical setting not specified</i>)</p> <p><b>Year 5</b> - One placement in general practice</p>                                                                                                                                                                                                                                                                                                                                                                                      |
| 11 | <b>Exeter (University of)</b>                                                                  | <p><b>Years 1 &amp; 2</b> – Community placements</p> <p><b>Years 3 &amp; 4</b> – meet patients at home, in GP's, in acute and community hospitals.</p> <p><b>Year 5</b> – One community placement.</p>                                                                                                                                                                                                                                                                                                                                                                                                                                                                                                                            |

|    |                                                                                             |                                                                                                                                                                                                                                                                                                                                                                                                                                                                                                                                                                                                                                                                                                                                                                                  |
|----|---------------------------------------------------------------------------------------------|----------------------------------------------------------------------------------------------------------------------------------------------------------------------------------------------------------------------------------------------------------------------------------------------------------------------------------------------------------------------------------------------------------------------------------------------------------------------------------------------------------------------------------------------------------------------------------------------------------------------------------------------------------------------------------------------------------------------------------------------------------------------------------|
| 12 | Glasgow (University of)                                                                     | <b>First 15 weeks of Year 3</b> – Students develop clinical skills in the hospital and GP environment.<br><b>Second half of Year 3, years 4 &amp; 5</b> – One GP placement                                                                                                                                                                                                                                                                                                                                                                                                                                                                                                                                                                                                       |
| 13 | Hull York Medical School                                                                    | Students alternate between a hospital and primary care setting in all clinical placements.<br><b>Year 1</b> – Half a day each week on clinical placement.<br><b>Year 2</b> – One day each week on clinical placement.<br><b>Years 3 &amp; 4</b> – Clinical placements in both GP and hospitals.<br><b>Year 5</b> – Medical student is treated as a junior member of the medical team. Students have a general practice rotation, in which they see patients and perform routine medical procedures under the supervision of the GP.                                                                                                                                                                                                                                              |
| 14 | Imperial College School of Medicine                                                         | <b>Years 1 &amp; 2</b> – “The Patient Contact Course” (for chronic illnesses) involve students getting attached to one patient/family and visiting them at their homes and in the clinical setting. Learning is supplemented by GP and hospital visits.<br><b>Year 3</b> - Learning basic clinical skills and methods in general practice.<br><b>Year 5</b> - One GP & Primary Health Care placement.<br><b>Year 6</b> - 3 week “General Practice Student Assistantship” placement.                                                                                                                                                                                                                                                                                              |
| 15 | Keele University                                                                            | <b>Year 1</b> - Placements in GP setting.<br><b>Year 2</b> - Students select a “third sector” placement from a range of community organisations.<br><b>Year 3</b> - 4 weeks spent consolidating clinical skills in GP surgery.<br><b>Year 4</b> - 4 weeks in general practice, as well as an option of a Special Study Component in GP.<br><b>Year 5</b> - Longer GP placement. Students also work in small groups to identify community needs.                                                                                                                                                                                                                                                                                                                                  |
| 16 | King's College London School of Medicine (at Guy's, King's College and St Thomas' Hospital) | Inter-professional education is embedded in the medical curriculum throughout the duration of the course.<br><b>Year 1 (term 1)</b> – Students have their first experiences of primary care (visiting GP and interviewing patients) & hospital.<br><b>Phase 2 (3 terms)</b> - Continuing clinical contact in primary care attachments and GP visits<br><b>Phase 3 (3 terms)</b> – Students study basic skills with a GP teacher. Each of the three placements involve community attachments.<br><b>Phase 4 (3 13-weeks rotations)</b> - A “Community and Applied-Health Promotion Study” is done following a pregnant women and her family. Students also continue Multi-Disciplinary Team learning.<br><b>Phase 5 (final year)</b> - One 8 week attachment in GP and community. |
| 17 | Lancaster University                                                                        | <b>Year 1</b> – Students have a community attachment in the second term with health visitors<br><b>Year 2</b> - One day per week on community attachment e.g. GP, community clinical teaching or community-related assessment.<br><b>Year 3</b> – One GP placement with a focus on disability.<br><b>Year 4</b> - One day per week in GP<br><b>Year 5</b> – One community attachment.                                                                                                                                                                                                                                                                                                                                                                                            |
| 18 | Leeds (University of)                                                                       | <b>Year 1</b> – “Campus to Clinic” module (lasting half the academic year): students work in a healthcare team for 1 day per week, rotating between primary and secondary care. Medical students also arrange a community visit to a healthcare voluntary group close to their practice.<br><b>Year 2</b> – “Campus to Clinic” module (lasting half the academic year).<br><b>Year 3</b> - 5 week primary care placement.<br><b>Year 5</b> - One placement (8 weeks) involves integrating teaching between primary and secondary care.                                                                                                                                                                                                                                           |
| 19 | Leicester (University of)                                                                   | <b>Phase 1 (First 5 Terms)</b> – Community attachments are undertaken to gain experience of the social implications of medicine. Study of social and behavioural sciences supplements these placements.<br><b>Phase 2</b> – Time is spent in “innovative community attachments” to allow learning of the Multi-Disciplinary Team.                                                                                                                                                                                                                                                                                                                                                                                                                                                |
| 20 | Liverpool (University of)                                                                   | <b>Years 2-5</b> – Hospital and community-based clinical experiences.                                                                                                                                                                                                                                                                                                                                                                                                                                                                                                                                                                                                                                                                                                            |
| 21 | Manchester (University of)                                                                  | <b>Year 1</b> - Community visits<br><b>Year 3</b> - Community placements related to certain modules.<br><b>Year 4</b> - Community and primary care teaching on further modules.<br><b>Year 5</b> - Students work as part of the team in GP, community paediatrics or community psychiatry, running their own consultations and seeing patients independently.                                                                                                                                                                                                                                                                                                                                                                                                                    |
| 22 | Newcastle University Medical School                                                         | <b>Year 1 &amp; 2</b> – Early clinical experience with full and half-days spent in GP practices and hospital visits. Students also do 2 patient studies: One “family study project” and one in-depth study of a patient with chronic illness.<br><b>Year 3</b> – Half a day each week spent in General Practice.<br><b>Year 5</b> – Primary Care clinical rotation including out-of-hours calls with GPs.                                                                                                                                                                                                                                                                                                                                                                        |
| 23 | Norwich Medical School, University of East Anglia                                           | <i>NB: No year-by-year information given.</i><br>“Regular placements in both hospital and General Practice allow students to observe the full range of                                                                                                                                                                                                                                                                                                                                                                                                                                                                                                                                                                                                                           |

|    |                                                                         |                                                                                                                                                                                                                                                                                                                                                                                                                                                                                                                                                                                                                                                                                                                     |
|----|-------------------------------------------------------------------------|---------------------------------------------------------------------------------------------------------------------------------------------------------------------------------------------------------------------------------------------------------------------------------------------------------------------------------------------------------------------------------------------------------------------------------------------------------------------------------------------------------------------------------------------------------------------------------------------------------------------------------------------------------------------------------------------------------------------|
|    |                                                                         | patient care"                                                                                                                                                                                                                                                                                                                                                                                                                                                                                                                                                                                                                                                                                                       |
| 24 | <b>Nottingham (The University of)</b>                                   | <p><b>Year 1 &amp; 2</b> – One morning every month spent with GP.</p> <p><b>Year 3</b> - "Community Follow Up Project" (starting in Year 2) is completed. Projects involves following an assigned patient for 18 months, and learning about the effects of the patients care on the patient and their family.</p> <p><b>Year 4</b> – One week Community Attachment during Obstetrics and Gynaecology placement and one day spent with a community midwife. Regular community visits during Paediatrics attachment (GP, Community Paediatrician, Health Visitor, and School Nurse). Students are also given an option of a Special Study Module in primary care.</p> <p><b>Year 5</b> - One 5 week GP placement.</p> |
| 25 | <b>Oxford (University of)</b>                                           | <p><b>Years 1 &amp; 2</b> – meeting patients in GP</p> <p><b>Year 4</b> – meeting patients in GP (2 weeks) and a GP Residential Attachment (1 week).</p> <p><b>Year 5</b> – One community placement (in clinical geratology, dermatology, palliative care, primary health care or public/ population health)</p> <p><b>Year 6</b> – optional 12-week special study module in primary care.</p>                                                                                                                                                                                                                                                                                                                      |
| 26 | <b>Plymouth University, Peninsula Schools of Medicine and Dentistry</b> | <p><b>Year 1</b> – Weekly practical community based work throughout the course, inclusive of "Sure Start" or drug clinic visits.</p> <p><b>Year 2</b> – GP practice visits on 6 separate days.</p> <p><b>Year 3 &amp; 4</b> – Students can see patients themselves in supervised settings in a General Practice during a week-long placement, three times in each year.</p> <p><b>Year 5</b> – 6 week long GP placement.</p>                                                                                                                                                                                                                                                                                        |
| 27 | <b>Queen's University Belfast</b>                                       | <p><i>NB: Little information on course structure is available online</i></p> <p><b>Years 4 &amp; 5</b> - Teachings in GP</p>                                                                                                                                                                                                                                                                                                                                                                                                                                                                                                                                                                                        |
| 28 | <b>Sheffield (The University of)</b>                                    | <p><b>Years 1 &amp; 2</b> - Community attachments within GPs &amp; some social services locations.</p> <p><b>Two years including second half of Year 3, Year 4 &amp; first half of Year 5</b> – One community health placement at GP.</p>                                                                                                                                                                                                                                                                                                                                                                                                                                                                           |
| 29 | <b>Southampton (University of)</b>                                      | <p><b>Years 1 &amp; 2</b> - Contact with patients in a variety of clinical settings, including a community engagement project.</p> <p><b>Year 3</b> – Students undertake a research study which may involve work with general practices or in the community. Students also undertake a GP clinical placement, focusing on the effects of clinical disorders on patients and their families.</p> <p><b>Year 4</b> - Range of clinical placements (<i>clinical setting not specified</i>).</p> <p><b>Year 5</b> – One GP placement.</p>                                                                                                                                                                               |
| 30 | <b>St Andrews (University of)</b>                                       | <p><b>Years 1 &amp; 2</b> - Regular primary care attachments in local hospitals.</p> <p><b>Between 2<sup>nd</sup> &amp; 3<sup>rd</sup> Year</b> - Optional residential week in a range of primary clinical care placements.</p> <p><b>Years 4 &amp; 5</b> – <i>Medical programme completed at a "Partner Medical School" in Aberdeen, Dundee, Edinburgh, Glasgow or Manchester.</i></p>                                                                                                                                                                                                                                                                                                                             |
| 31 | <b>St George's, University of London</b>                                | <p><b>Year 1</b> - Half days of GP and community visits.</p> <p><b>Year 3</b> - 3 week GP/primary care placement.</p> <p><b>Year 5</b> - 5 week placement in GP, 2 weeks in public health.</p>                                                                                                                                                                                                                                                                                                                                                                                                                                                                                                                      |
| 32 | <b>University College London</b>                                        | <p><b>Years 1 &amp; 2</b> - "Opportunities for early patient contact and for meeting health professionals".</p> <p><b>Year 4</b> - "Three long attachments in hospitals and associated community and GP settings" concentrating on community based care, ward based care and emergency care.</p> <p><b>Years 6</b> – 4-week GP placement</p>                                                                                                                                                                                                                                                                                                                                                                        |

TABLE 4: Summary of Systematic Review

|    | University                                                   | Author (Year)              | Description of CBE                                                                                                                                                      | Type of Evaluation                                                        | Evaluation findings                                                                                                                                                                                                                                                                                                                                                                               | Evaluation method                                                       |
|----|--------------------------------------------------------------|----------------------------|-------------------------------------------------------------------------------------------------------------------------------------------------------------------------|---------------------------------------------------------------------------|---------------------------------------------------------------------------------------------------------------------------------------------------------------------------------------------------------------------------------------------------------------------------------------------------------------------------------------------------------------------------------------------------|-------------------------------------------------------------------------|
| 1. | <b>Aberdeen (University of)</b>                              | Sinclair et al. (2006)     | Years 1-3: GP-led patient-centred tutorials and clinical sessions<br><br>Year 4: 5-week community-themed clinical rotation<br><br>Year 5: optional 7-week GP attachment | Impact Assessment                                                         | Increase in students interested in pursuing a career in GP as curriculum progressed<br><br>Exposure to community settings had positive effect on students' attitudes towards a career in general practice                                                                                                                                                                                         | Questionnaire – Student Survey                                          |
| 2. | <b>Barts and The London School of Medicine and Dentistry</b> | Nicholson et al. (2001)    | Year 4: Community-based Module prior to Obstetrics and Gynaecology hospital placement                                                                                   | Implementation Assessment<br><br>Impact Assessment                        | Adequate clinical exposure within the community<br><br>Variation in opportunities to gain relevant experience in clinical exposure<br><br>Students found small-group learning and GP attitudes to be beneficial to their learning<br><br>Multi-disciplinary interaction enhanced their clinical experience<br><br>Successfully Incorporated specialty with community environment                  | Questionnaire – Student Feedback                                        |
| 3. | Birmingham (University of)                                   | Parle et al. (1999)        | Years 1-4: GP practice visits                                                                                                                                           | Implementation Assessment<br><br>Impact Assessment                        | Students found GP tutors to be encouraging<br><br>GP Tutors reported:<br>-Enhanced development of both students and GPs<br>-Organizational drawbacks                                                                                                                                                                                                                                              | Questionnaire – Student Feedback                                        |
| 4. | Cambridge (University of)                                    | Alderson and Oswald (1999) | 15-month attachment to GP practice                                                                                                                                      | Implementation Assessment                                                 | Adequate exposure of all clinical specialities was achieved<br><br>Individual experiences may vary due to variation in opportunities                                                                                                                                                                                                                                                              | Student Log Diary                                                       |
| 5. | Cambridge (University of)                                    | Oswald et al. (2001)       | 15-month attachment to GP practice                                                                                                                                      | Implementation Assessment<br><br>Impact Assessment<br><br>Cost Assessment | Course was feasible in terms of organization and student logistics<br><br>Extended relationships with patients enriched students' clinical experience<br><br>No difference in academic performance on formative assessments between students undertaking community-based versus hospital-based teaching<br><br>Reported costs were less than the average <i>SIFT into the Future</i> student-year | Debriefing Sessions – Student Feedback                                  |
| 6. | Cardiff University                                           | Grant and Robling (2006)   | Year 5: GP attachment                                                                                                                                                   | Needs assessment                                                          | All parties found the attachment to be positive<br><br>GPs felt more confident clinically                                                                                                                                                                                                                                                                                                         | Discussion Meetings – Primary Care Team Feedback<br><br>Interviews – GP |

|    |     |                         |                                  |                                                                    |                                                    |                                                                                                                                                                                                                                                                              |                                                                                                                          |
|----|-----|-------------------------|----------------------------------|--------------------------------------------------------------------|----------------------------------------------------|------------------------------------------------------------------------------------------------------------------------------------------------------------------------------------------------------------------------------------------------------------------------------|--------------------------------------------------------------------------------------------------------------------------|
| 1  |     |                         |                                  | Impact assessment                                                  | through teaching students                          | Feedback                                                                                                                                                                                                                                                                     |                                                                                                                          |
| 2  |     |                         |                                  |                                                                    | Primary care team felt team ethic was strengthened |                                                                                                                                                                                                                                                                              |                                                                                                                          |
| 3  |     |                         |                                  |                                                                    |                                                    |                                                                                                                                                                                                                                                                              |                                                                                                                          |
| 4  |     |                         |                                  |                                                                    |                                                    |                                                                                                                                                                                                                                                                              |                                                                                                                          |
| 5  | 7.  | Dundee (University of)  | Muir (2007)                      | Year 1-3: Patient Follow-up in the community                       | Impact Assessment                                  | Students were able to gain a better insight into patient-centred medicine as a result of the attachment                                                                                                                                                                      | Focus Group – Student Interview                                                                                          |
| 6  |     |                         |                                  |                                                                    |                                                    | Early exposure to patients evoked student enthusiasm                                                                                                                                                                                                                         |                                                                                                                          |
| 7  |     |                         |                                  |                                                                    |                                                    |                                                                                                                                                                                                                                                                              |                                                                                                                          |
| 8  |     |                         |                                  |                                                                    |                                                    |                                                                                                                                                                                                                                                                              |                                                                                                                          |
| 9  |     |                         |                                  |                                                                    |                                                    |                                                                                                                                                                                                                                                                              |                                                                                                                          |
| 10 |     |                         |                                  |                                                                    |                                                    |                                                                                                                                                                                                                                                                              |                                                                                                                          |
| 11 | 8.  | Glasgow (University of) | Davison et al. (1999)            | Year 1: Educational exercise of three teaching sessions            | Needs Assessment                                   | Students found that learning objectives were met through community-themed educational exercises                                                                                                                                                                              | Questionnaire – Student Evaluation                                                                                       |
| 12 |     |                         |                                  |                                                                    |                                                    |                                                                                                                                                                                                                                                                              |                                                                                                                          |
| 13 |     |                         |                                  |                                                                    |                                                    |                                                                                                                                                                                                                                                                              |                                                                                                                          |
| 14 |     |                         |                                  |                                                                    |                                                    |                                                                                                                                                                                                                                                                              |                                                                                                                          |
| 15 | 9.  | Glasgow (University of) | Mullen et al. (2010)             | Year 1: Patient interviews in the community                        | Impact Assessment                                  | Integration of community-based exercise positively influenced students' attitudes in regards to:<br>-understanding of psycho-social model of illness<br>-development of empathy                                                                                              | Questionnaire – Student Evaluation                                                                                       |
| 16 |     |                         |                                  |                                                                    |                                                    |                                                                                                                                                                                                                                                                              |                                                                                                                          |
| 17 |     |                         |                                  |                                                                    |                                                    |                                                                                                                                                                                                                                                                              |                                                                                                                          |
| 18 |     |                         |                                  |                                                                    |                                                    |                                                                                                                                                                                                                                                                              |                                                                                                                          |
| 19 |     |                         |                                  |                                                                    |                                                    |                                                                                                                                                                                                                                                                              |                                                                                                                          |
| 20 |     |                         |                                  |                                                                    |                                                    |                                                                                                                                                                                                                                                                              |                                                                                                                          |
| 21 |     |                         |                                  |                                                                    |                                                    |                                                                                                                                                                                                                                                                              |                                                                                                                          |
| 22 | 10. | Imperial College        | Powell and Easton (2012)         | Year 3: 3-session surgical module conducted by GP teachers         | Implementation Assessment                          | Surgical teaching delivered by GPs was favourable based on the following benefits:<br>- protected time for learning<br>- regular access to suitable patients<br>- learner-centred teaching<br><br>GPs lacked specialist knowledge, and teaching was not directed by syllabus | Focus group – Student Interview                                                                                          |
| 23 |     |                         |                                  |                                                                    |                                                    |                                                                                                                                                                                                                                                                              |                                                                                                                          |
| 24 |     |                         |                                  |                                                                    |                                                    |                                                                                                                                                                                                                                                                              |                                                                                                                          |
| 25 |     |                         |                                  |                                                                    |                                                    |                                                                                                                                                                                                                                                                              |                                                                                                                          |
| 26 |     |                         |                                  |                                                                    |                                                    |                                                                                                                                                                                                                                                                              |                                                                                                                          |
| 27 |     |                         |                                  |                                                                    |                                                    |                                                                                                                                                                                                                                                                              |                                                                                                                          |
| 28 |     |                         |                                  |                                                                    |                                                    |                                                                                                                                                                                                                                                                              |                                                                                                                          |
| 29 |     |                         |                                  |                                                                    |                                                    |                                                                                                                                                                                                                                                                              |                                                                                                                          |
| 30 |     |                         |                                  |                                                                    |                                                    |                                                                                                                                                                                                                                                                              |                                                                                                                          |
| 31 |     |                         |                                  |                                                                    |                                                    |                                                                                                                                                                                                                                                                              |                                                                                                                          |
| 32 | 11. | King's College London   | Seabrook et al. (1999)           | Year 1: Healthcare Team Module<br><br>Year 2: Special Study Module | Implementation Assessment<br><br>Impact Assessment | Community-based courses are feasible and well-received by students<br><br>Multi-disciplinary teamwork is encouraged positively                                                                                                                                               | Questionnaires – Student feedback<br><br>Small-group discussions – Student feedback<br><br>Focus groups – Tutor Feedback |
| 33 |     |                         |                                  |                                                                    |                                                    |                                                                                                                                                                                                                                                                              |                                                                                                                          |
| 34 |     |                         |                                  |                                                                    |                                                    |                                                                                                                                                                                                                                                                              |                                                                                                                          |
| 35 |     |                         |                                  |                                                                    |                                                    |                                                                                                                                                                                                                                                                              |                                                                                                                          |
| 36 |     |                         |                                  |                                                                    |                                                    |                                                                                                                                                                                                                                                                              |                                                                                                                          |
| 37 |     |                         |                                  |                                                                    |                                                    |                                                                                                                                                                                                                                                                              |                                                                                                                          |
| 38 |     |                         |                                  |                                                                    |                                                    |                                                                                                                                                                                                                                                                              |                                                                                                                          |
| 39 |     |                         |                                  |                                                                    |                                                    |                                                                                                                                                                                                                                                                              |                                                                                                                          |
| 40 |     |                         |                                  |                                                                    |                                                    |                                                                                                                                                                                                                                                                              |                                                                                                                          |
| 41 |     |                         |                                  |                                                                    |                                                    |                                                                                                                                                                                                                                                                              |                                                                                                                          |
| 42 |     |                         |                                  |                                                                    |                                                    |                                                                                                                                                                                                                                                                              |                                                                                                                          |
| 43 |     |                         |                                  |                                                                    |                                                    |                                                                                                                                                                                                                                                                              |                                                                                                                          |
| 44 |     |                         |                                  |                                                                    |                                                    |                                                                                                                                                                                                                                                                              |                                                                                                                          |
| 45 | 12. | King's College London   | Gavin et al. (2002)              | Year 2 – Community-based Special Study Module                      | Impact Assessment                                  | Student appreciation of:<br>- psychosocial needs of patients<br>- inter-professional teamwork                                                                                                                                                                                | Questionnaire survey: students and teaching professionals                                                                |
| 46 |     |                         |                                  |                                                                    |                                                    |                                                                                                                                                                                                                                                                              |                                                                                                                          |
| 47 |     |                         |                                  |                                                                    |                                                    |                                                                                                                                                                                                                                                                              |                                                                                                                          |
| 48 |     |                         |                                  |                                                                    |                                                    |                                                                                                                                                                                                                                                                              |                                                                                                                          |
| 49 |     |                         |                                  |                                                                    |                                                    |                                                                                                                                                                                                                                                                              |                                                                                                                          |
| 50 |     |                         |                                  |                                                                    |                                                    |                                                                                                                                                                                                                                                                              |                                                                                                                          |
| 51 |     |                         |                                  |                                                                    |                                                    |                                                                                                                                                                                                                                                                              |                                                                                                                          |
| 52 |     |                         |                                  |                                                                    |                                                    |                                                                                                                                                                                                                                                                              |                                                                                                                          |
| 53 |     |                         |                                  |                                                                    |                                                    |                                                                                                                                                                                                                                                                              |                                                                                                                          |
| 54 |     |                         |                                  |                                                                    |                                                    |                                                                                                                                                                                                                                                                              |                                                                                                                          |
| 55 |     |                         |                                  |                                                                    |                                                    |                                                                                                                                                                                                                                                                              |                                                                                                                          |
| 56 |     |                         |                                  |                                                                    |                                                    |                                                                                                                                                                                                                                                                              |                                                                                                                          |
| 57 |     |                         |                                  |                                                                    |                                                    |                                                                                                                                                                                                                                                                              |                                                                                                                          |
| 58 | 13. | Leeds (University of)   | Thistlethwaite and Jordan (1999) | Year 3: GP-led days in community setting                           | Impact Assessment                                  | Early community exposure to patient-centred consultations allowed students to:                                                                                                                                                                                               | Focus Groups – Student Interviews                                                                                        |
| 59 |     |                         |                                  |                                                                    |                                                    |                                                                                                                                                                                                                                                                              |                                                                                                                          |
| 60 |     |                         |                                  |                                                                    |                                                    |                                                                                                                                                                                                                                                                              |                                                                                                                          |

|     |                                                                               |                             |                                               |                                                                                   |                                                                                                                                                                                                                                                                                                                                                                                                                                                                                                                                  |                                                                                             |
|-----|-------------------------------------------------------------------------------|-----------------------------|-----------------------------------------------|-----------------------------------------------------------------------------------|----------------------------------------------------------------------------------------------------------------------------------------------------------------------------------------------------------------------------------------------------------------------------------------------------------------------------------------------------------------------------------------------------------------------------------------------------------------------------------------------------------------------------------|---------------------------------------------------------------------------------------------|
|     |                                                                               |                             |                                               |                                                                                   | <p>-Appreciate importance of patient-centred communication</p> <p>-Gain more confidence in their abilities</p> <p>Direct observation and feedback from clinician was beneficial to student learning</p>                                                                                                                                                                                                                                                                                                                          |                                                                                             |
| 14. | Leeds (University of)                                                         | Thistlethwaite (2000)       | Year 3: GP-led days in community setting      | <p>Implementation Assessment</p> <p>Impact Assessment</p>                         | <p>Positive feedback from students:</p> <ul style="list-style-type: none"> <li>-community environment allowed ease of patient-centre approach</li> <li>-students now routinely ask about patient concerns</li> </ul> <p>Positive feedback from GPs:</p> <ul style="list-style-type: none"> <li>-teaching was motivating and gratifying</li> </ul>                                                                                                                                                                                | Questionnaire – Student Feedback                                                            |
| 15. | Leeds (University of), Sheffield (University of) and Hull York Medical School | Macallan and Pearson (2013) | Year 3-4: GP attachment                       | Implementation Assessment                                                         | <p>GP enthusiasm and engagement crucial to determining the quality of the placement</p> <p>Well-organized GP practices were valued by students</p> <p>Students felt that GPs needed to be better informed of placement outcomes</p>                                                                                                                                                                                                                                                                                              | Focus Groups – Student Interviews                                                           |
| 16. | Leicester (University of)                                                     | Lennox and Petersen (1998)  | Year 3: Patient Study                         | <p>Needs Assessment</p> <p>Implementation Assessment</p> <p>Impact assessment</p> | <p>Pre-course Needs Assessment of CBE programme based on students' opinions of:</p> <ul style="list-style-type: none"> <li>- Structure of course</li> <li>- Method of implementation</li> <li>- Assessment format</li> </ul> <p>End-course impact assessment revealed that:</p> <p>Course effectively achieves GMC recommendations for "Tomorrow's Doctors"</p> <p>End-Course Implementation assessment revealed that:</p> <p>Continuation of the course was supported by all participants (students, patients and agencies)</p> | Questionnaire – Student, Patient and Agency Feedback                                        |
| 17. | Leicester (University of)                                                     | Hastings et al. (2000)      | Year 3 or 4: GP practice-based teaching       | Implementation assessment                                                         | Comparison of practice-based & hospital-based teaching with respect to the 'teaching content' and the 'teaching processes revealed students favouring practice-teaching in both respects.                                                                                                                                                                                                                                                                                                                                        | Questionnaire – Student Feedback                                                            |
| 18. | Leicester (University of)                                                     | Anderson et al. (2003)      | Year 3: Community placement and Patient study | <p>Implementation assessment</p> <p>Impact assessment</p>                         | <p>Implementation assessment:</p> <ul style="list-style-type: none"> <li>- Continuation of course was well-supported by students, patients and staff</li> </ul> <p>Impact Assessment:</p> <ul style="list-style-type: none"> <li>- Course effectively achieved students' learning objectives in community education.</li> </ul>                                                                                                                                                                                                  | <p>Questionnaires – Student and Patient Feedback</p> <p>Focus Groups – Staff Interviews</p> |

|    |     |                                                   |                          |                                                                          |                                                                                    |                                                                                                                                                                                                                                                                                                                                                       |                                                                                             |
|----|-----|---------------------------------------------------|--------------------------|--------------------------------------------------------------------------|------------------------------------------------------------------------------------|-------------------------------------------------------------------------------------------------------------------------------------------------------------------------------------------------------------------------------------------------------------------------------------------------------------------------------------------------------|---------------------------------------------------------------------------------------------|
| 1  |     |                                                   |                          |                                                                          | - Positive patient and staff experience in their involvement in medical education. |                                                                                                                                                                                                                                                                                                                                                       |                                                                                             |
| 2  |     |                                                   |                          |                                                                          |                                                                                    |                                                                                                                                                                                                                                                                                                                                                       |                                                                                             |
| 3  |     |                                                   |                          |                                                                          |                                                                                    |                                                                                                                                                                                                                                                                                                                                                       |                                                                                             |
| 4  | 19. | Liverpool (University of)                         | Watmough (2012)          | Year 1-4: Community-based teaching<br><br>Year 5: Community placement    | Implementation Assessment<br><br>Impact Assessment                                 | Implementation Assessment:<br>-Increased curriculum time on community-based teaching was appreciated in terms of clinical skills practice, and understanding the role of primary care.<br><br>Impact Assessment:<br>- Reformed course achieved significantly better understanding on the relationship between primary, social care and hospital care. | Questionnaires and Interviews – Student Feedback                                            |
| 5  |     |                                                   |                          |                                                                          |                                                                                    |                                                                                                                                                                                                                                                                                                                                                       |                                                                                             |
| 6  |     |                                                   |                          |                                                                          |                                                                                    |                                                                                                                                                                                                                                                                                                                                                       |                                                                                             |
| 7  |     |                                                   |                          |                                                                          |                                                                                    |                                                                                                                                                                                                                                                                                                                                                       |                                                                                             |
| 8  |     |                                                   |                          |                                                                          |                                                                                    |                                                                                                                                                                                                                                                                                                                                                       |                                                                                             |
| 9  |     |                                                   |                          |                                                                          |                                                                                    |                                                                                                                                                                                                                                                                                                                                                       |                                                                                             |
| 10 |     |                                                   |                          |                                                                          |                                                                                    |                                                                                                                                                                                                                                                                                                                                                       |                                                                                             |
| 11 |     |                                                   |                          |                                                                          |                                                                                    |                                                                                                                                                                                                                                                                                                                                                       |                                                                                             |
| 12 |     |                                                   |                          |                                                                          |                                                                                    |                                                                                                                                                                                                                                                                                                                                                       |                                                                                             |
| 13 |     |                                                   |                          |                                                                          |                                                                                    |                                                                                                                                                                                                                                                                                                                                                       |                                                                                             |
| 14 |     |                                                   |                          |                                                                          |                                                                                    |                                                                                                                                                                                                                                                                                                                                                       |                                                                                             |
| 15 |     |                                                   |                          |                                                                          |                                                                                    |                                                                                                                                                                                                                                                                                                                                                       |                                                                                             |
| 16 |     |                                                   |                          |                                                                          |                                                                                    |                                                                                                                                                                                                                                                                                                                                                       |                                                                                             |
| 17 |     |                                                   |                          |                                                                          |                                                                                    |                                                                                                                                                                                                                                                                                                                                                       |                                                                                             |
| 18 | 20. | Liverpool (University of)                         | Watmough et al. (2012)   | Year 1-4: Community-based teaching<br><br>Year 5: Community placement    | Impact Assessment                                                                  | Impact Assessment:<br>- Graduates from reformed curriculum had more confidence in clinical skills & communication skills, but felt less well prepared with their medical knowledge.                                                                                                                                                                   | Questionnaires – Student Feedback                                                           |
| 19 |     |                                                   |                          |                                                                          |                                                                                    |                                                                                                                                                                                                                                                                                                                                                       |                                                                                             |
| 20 |     |                                                   |                          |                                                                          |                                                                                    |                                                                                                                                                                                                                                                                                                                                                       |                                                                                             |
| 21 |     |                                                   |                          |                                                                          |                                                                                    |                                                                                                                                                                                                                                                                                                                                                       |                                                                                             |
| 22 |     |                                                   |                          |                                                                          |                                                                                    |                                                                                                                                                                                                                                                                                                                                                       |                                                                                             |
| 23 |     |                                                   |                          |                                                                          |                                                                                    |                                                                                                                                                                                                                                                                                                                                                       |                                                                                             |
| 24 | 21. | Manchester (University of)                        | Jones et al. (2002)      | Year 3-4: GP teaching in core modules<br><br>Year 5: Community placement | Impact Assessment                                                                  | Overall positive impact on students' perception of preparedness in competencies and skills for entering professional practice. This includes a significantly improved understanding of the role of primary care.<br><br>Students also had no disadvantage to graduates of traditional programme in terms of basic science and clinical knowledge.     | Questionnaires – Student and Supervisor Feedback                                            |
| 25 |     |                                                   |                          |                                                                          |                                                                                    |                                                                                                                                                                                                                                                                                                                                                       |                                                                                             |
| 26 |     |                                                   |                          |                                                                          |                                                                                    |                                                                                                                                                                                                                                                                                                                                                       |                                                                                             |
| 27 |     |                                                   |                          |                                                                          |                                                                                    |                                                                                                                                                                                                                                                                                                                                                       |                                                                                             |
| 28 |     |                                                   |                          |                                                                          |                                                                                    |                                                                                                                                                                                                                                                                                                                                                       |                                                                                             |
| 29 |     |                                                   |                          |                                                                          |                                                                                    |                                                                                                                                                                                                                                                                                                                                                       |                                                                                             |
| 30 |     |                                                   |                          |                                                                          |                                                                                    |                                                                                                                                                                                                                                                                                                                                                       |                                                                                             |
| 31 |     |                                                   |                          |                                                                          |                                                                                    |                                                                                                                                                                                                                                                                                                                                                       |                                                                                             |
| 32 |     |                                                   |                          |                                                                          |                                                                                    |                                                                                                                                                                                                                                                                                                                                                       |                                                                                             |
| 33 |     |                                                   |                          |                                                                          |                                                                                    |                                                                                                                                                                                                                                                                                                                                                       |                                                                                             |
| 34 |     |                                                   |                          |                                                                          |                                                                                    |                                                                                                                                                                                                                                                                                                                                                       |                                                                                             |
| 35 |     |                                                   |                          |                                                                          |                                                                                    |                                                                                                                                                                                                                                                                                                                                                       |                                                                                             |
| 36 |     |                                                   |                          |                                                                          |                                                                                    |                                                                                                                                                                                                                                                                                                                                                       |                                                                                             |
| 37 | 22. | Newcastle University Medical School               | Stacy and Spencer (1999) | Year 2: Patient study projects                                           | Impact Assessment                                                                  | Patients have a positive perception of their role in community-based teaching. They also feel that they benefited from participation.                                                                                                                                                                                                                 | Interviews                                                                                  |
| 38 |     |                                                   |                          |                                                                          |                                                                                    |                                                                                                                                                                                                                                                                                                                                                       |                                                                                             |
| 39 |     |                                                   |                          |                                                                          |                                                                                    |                                                                                                                                                                                                                                                                                                                                                       |                                                                                             |
| 40 |     |                                                   |                          |                                                                          |                                                                                    |                                                                                                                                                                                                                                                                                                                                                       |                                                                                             |
| 41 |     |                                                   |                          |                                                                          |                                                                                    |                                                                                                                                                                                                                                                                                                                                                       |                                                                                             |
| 42 | 23. | Royal Free and University College Medical Schools | Walters et al. (2003)    | Year 4: Community education integrated in the psychiatry attachment      | Impact Assessment                                                                  | Impact of participation in teaching on patients:<br>- Mainly positive experience (more balanced doctor-patient relationship, and some had therapeutic benefit)<br>- However a few patients found the teaching encounter distressing                                                                                                                   | Questionnaire – Patient Survey<br><br>Interviews - Patients, Students and GP tutor Feedback |
| 43 |     |                                                   |                          |                                                                          |                                                                                    |                                                                                                                                                                                                                                                                                                                                                       |                                                                                             |
| 44 |     |                                                   |                          |                                                                          |                                                                                    |                                                                                                                                                                                                                                                                                                                                                       |                                                                                             |
| 45 |     |                                                   |                          |                                                                          |                                                                                    |                                                                                                                                                                                                                                                                                                                                                       |                                                                                             |
| 46 |     |                                                   |                          |                                                                          |                                                                                    |                                                                                                                                                                                                                                                                                                                                                       |                                                                                             |
| 47 |     |                                                   |                          |                                                                          |                                                                                    |                                                                                                                                                                                                                                                                                                                                                       |                                                                                             |
| 48 |     |                                                   |                          |                                                                          |                                                                                    |                                                                                                                                                                                                                                                                                                                                                       |                                                                                             |
| 49 |     |                                                   |                          |                                                                          |                                                                                    |                                                                                                                                                                                                                                                                                                                                                       |                                                                                             |
| 50 | 24. | Royal Free and University College Medical Schools | Jones et al. (2005)      | Intercalated BSc in Primary Health Care                                  | Impact Assessment                                                                  | Students saw benefit in:<br>- development of critical approach and skills relevant to medicine<br>- adding depth to views on GP and primary care                                                                                                                                                                                                      | Interviews – Student Feedback                                                               |
| 51 |     |                                                   |                          |                                                                          |                                                                                    |                                                                                                                                                                                                                                                                                                                                                       |                                                                                             |
| 52 |     |                                                   |                          |                                                                          |                                                                                    |                                                                                                                                                                                                                                                                                                                                                       |                                                                                             |
| 53 |     |                                                   |                          |                                                                          |                                                                                    |                                                                                                                                                                                                                                                                                                                                                       |                                                                                             |
| 54 |     |                                                   |                          |                                                                          |                                                                                    |                                                                                                                                                                                                                                                                                                                                                       |                                                                                             |
| 55 |     |                                                   |                          |                                                                          |                                                                                    |                                                                                                                                                                                                                                                                                                                                                       |                                                                                             |
| 56 | 25. | Sheffield (University of)                         | Howe and Ives (2001)     | Year 4: GP placement                                                     | Impact Assessment                                                                  | Increased exposure to primary and community care alters career intention, and enhances the view of the role of primary care.                                                                                                                                                                                                                          | Questionnaires – Student Feedback                                                           |
| 57 |     |                                                   |                          |                                                                          |                                                                                    |                                                                                                                                                                                                                                                                                                                                                       |                                                                                             |
| 58 |     |                                                   |                          |                                                                          |                                                                                    |                                                                                                                                                                                                                                                                                                                                                       |                                                                                             |
| 59 |     |                                                   |                          |                                                                          |                                                                                    |                                                                                                                                                                                                                                                                                                                                                       |                                                                                             |
| 60 |     |                                                   |                          |                                                                          |                                                                                    |                                                                                                                                                                                                                                                                                                                                                       |                                                                                             |



|     |                                 |                              |                                                               |                                                       |                                                                                                                                                                                                                                                                                                                                                                                                                     |                                                                            |
|-----|---------------------------------|------------------------------|---------------------------------------------------------------|-------------------------------------------------------|---------------------------------------------------------------------------------------------------------------------------------------------------------------------------------------------------------------------------------------------------------------------------------------------------------------------------------------------------------------------------------------------------------------------|----------------------------------------------------------------------------|
| 26. | Sheffield<br>(University of)    | Howe (2001)                  | Year 4: GP<br>placement                                       | Needs Assessment                                      | Students value community-based learning which have the qualities of:<br>- person-centred clinical methods and learning contexts<br>- positive attitude and committed GP tutors and primary care teams                                                                                                                                                                                                               | Questionnaire –<br>Student feedback                                        |
| 27. | University<br>College<br>London | Coleman and<br>Murray (2002) | GP placement                                                  | Impact Assessment                                     | Patients mainly felt positive about participating in community-based teaching.<br><br>However there were also negative aspects that may concern patients.<br><br>There may also be shifts in the doctor-patient relationship.                                                                                                                                                                                       | Interviews – Students<br>and GP tutor Feedback                             |
| 28. | University<br>College<br>London | Murray et al.<br>(2001)      | GP placement as<br>part of the internal<br>medicine clerkship | Implementation<br>Assessment                          | -Time spent on teaching and learning activities were similar in both settings<br>- Supervised interaction with patients (which was experienced mainly with the GP) is perceived by students as the most educationally valuable and enjoyable activity<br>- Patient-based learning was highly valued                                                                                                                 | Student Log Diary                                                          |
| 29. | University<br>College<br>London | O'Sullivan et al.<br>(2000)  | Year 3: Community<br>Medicine<br>placement                    | Implementation<br>Assessment<br><br>Impact Assessment | Implementation Assessment<br>- basic clinical skills could be learnt in both settings, but GP was better for learning of communication skills & psychosocial issues<br>- GP teaching was advantageous in terms of: quality of teaching, tutors' teaching attitude, teaching methods, course organisation.<br><br>Impact Assessment revealed that:<br>- GP enabled students to increase in confidence and competence | Interviews – Student<br>Feedback<br><br>Focus Groups –<br>Student Feedback |

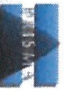

# PRISMA 2009 Checklist

| Section/topic                      | #  | Checklist item                                                                                                                                                                                                                                                                                              | Reported on page # |
|------------------------------------|----|-------------------------------------------------------------------------------------------------------------------------------------------------------------------------------------------------------------------------------------------------------------------------------------------------------------|--------------------|
| <b>TITLE</b>                       |    |                                                                                                                                                                                                                                                                                                             |                    |
| Title                              | 1  | Identify the report as a systematic review, meta-analysis, or both.                                                                                                                                                                                                                                         | 1                  |
| <b>ABSTRACT</b>                    |    |                                                                                                                                                                                                                                                                                                             |                    |
| Structured summary                 | 2  | Provide a structured summary including, as applicable: background; objectives; data sources; study eligibility criteria; participants; and interventions; study appraisal and synthesis methods; results; limitations; conclusions and implications of key findings; systematic review registration number. | 2                  |
| <b>INTRODUCTION</b>                |    |                                                                                                                                                                                                                                                                                                             |                    |
| Rationale                          | 3  | Describe the rationale for the review in the context of what is already known.                                                                                                                                                                                                                              | 3 ~ 4              |
| Objectives                         | 4  | Provide an explicit statement of questions being addressed with reference to participants, interventions, comparisons, outcomes, and study design (PICOS).                                                                                                                                                  | 4                  |
| <b>METHODS</b>                     |    |                                                                                                                                                                                                                                                                                                             |                    |
| Protocol and registration          | 5  | Indicate if a review protocol exists, if and where it can be accessed (e.g., Web address), and, if available, provide registration information including registration number.                                                                                                                               | 5<br>Table 1       |
| Eligibility criteria               | 6  | Specify study characteristics (e.g., PICOS, length of follow-up) and report characteristics (e.g., years considered, language, publication status) used as criteria for eligibility, giving rationale.                                                                                                      | 5                  |
| Information sources                | 7  | Describe all information sources (e.g., databases with dates of coverage, contact with study authors to identify additional studies) in the search and date last searched.                                                                                                                                  | 5                  |
| Search                             | 8  | Present full electronic search strategy for at least one database, including any limits used, such that it could be repeated.                                                                                                                                                                               | 5                  |
| Study selection                    | 9  | State the process for selecting studies (i.e., screening, eligibility, included in systematic review, and, if applicable, included in the meta-analysis).                                                                                                                                                   | 5                  |
| Data collection process            | 10 | Describe method of data extraction from reports (e.g., piloted forms, independently, in duplicate) and any processes for obtaining and confirming data from investigators.                                                                                                                                  | 5                  |
| Data items                         | 11 | List and define all variables for which data were sought (e.g., PICOS, funding sources) and any assumptions and simplifications made.                                                                                                                                                                       | 5                  |
| Risk of bias in individual studies | 12 | Describe methods used for assessing risk of bias of individual studies (including specification of whether this was done at the study or outcome level), and how this information is to be used in any data synthesis.                                                                                      | NA                 |
| Summary measures                   | 13 | State the principal summary measures (e.g., risk ratio, difference in means).                                                                                                                                                                                                                               | 7                  |
| Synthesis of results               | 14 | Describe the methods of handling data and combining results of studies, if done, including measures of consistency (e.g., $I^2$ ) for each meta-analysis.                                                                                                                                                   | NA                 |

1  
2  
3  
4  
5  
6  
7  
8  
9  
10  
11  
12  
13  
14  
15  
16  
17  
18  
19  
20  
21  
22  
23  
24  
25  
26  
27  
28  
29  
30  
31  
32  
33  
34  
35  
36  
37  
38  
39  
40  
41  
42  
43  
44  
45  
46  
47  
48  
49  
50  
51  
52  
53  
54  
55  
56  
57  
58  
59  
60

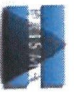

## PRISMA 2009 Checklist

| Section/topic                 | #  | Checklist item                                                                                                                                                                                           | Reported on page # |
|-------------------------------|----|----------------------------------------------------------------------------------------------------------------------------------------------------------------------------------------------------------|--------------------|
| Risk of bias across studies   | 15 | Specify any assessment of risk of bias that may affect the cumulative evidence (e.g., publication bias, selective reporting within studies).                                                             | Table 1            |
| Additional analyses           | 16 | Describe methods of additional analyses (e.g., sensitivity or subgroup analyses, meta-regression), if done, indicating which were pre-specified.                                                         | \$ N/A             |
| <b>RESULTS</b>                |    |                                                                                                                                                                                                          |                    |
| Study selection               | 17 | Give numbers of studies screened, assessed for eligibility, and included in the review, with reasons for exclusions at each stage, ideally with a flow diagram.                                          | Figure 1<br>5      |
| Study characteristics         | 18 | For each study, present characteristics for which data were extracted (e.g., study size, PICOS, follow-up period) and provide the citations.                                                             | 5                  |
| Risk of bias within studies   | 19 | Present data on risk of bias of each study and, if available, any outcome level assessment (see item 12).                                                                                                | N/A                |
| Results of individual studies | 20 | For all outcomes considered (benefits or harms), present, for each study: (a) simple summary data for each intervention group (b) effect estimates and confidence intervals, ideally with a forest plot. | Figures 2~3        |
| Synthesis of results          | 21 | Present results of each meta-analysis done, including confidence intervals and measures of consistency.                                                                                                  | N/A                |
| Risk of bias across studies   | 22 | Present results of any assessment of risk of bias across studies (see item 15).                                                                                                                          |                    |
| Additional analysis           | 23 | Give results of additional analyses, if done (e.g., sensitivity or subgroup analyses, meta-regression [see item 16]).                                                                                    | N/A                |
| <b>DISCUSSION</b>             |    |                                                                                                                                                                                                          |                    |
| Summary of evidence           | 24 | Summarize the main findings including the strength of evidence for each main outcome; consider their relevance to key groups (e.g., healthcare providers, users, and policy makers).                     | 12                 |
| Limitations                   | 25 | Discuss limitations at study and outcome level (e.g., risk of bias), and at review-level (e.g., incomplete retrieval of identified research, reporting bias).                                            | MB 14              |
| Conclusions                   | 26 | Provide a general interpretation of the results in the context of other evidence, and implications for future research.                                                                                  | 13                 |
| <b>FUNDING</b>                |    |                                                                                                                                                                                                          |                    |
| Funding                       | 27 | Describe sources of funding for the systematic review and other support (e.g., supply of data); role of funders for the systematic review.                                                               | N/A                |

From: Moher D, Liberati A, Tetzlaff J, Altman DG, The PRISMA Group (2009). Preferred Reporting Items for Systematic Reviews and Meta-Analyses: The PRISMA Statement. *PLoS Med* 6(6): e1000097. doi:10.1371/journal.pmed1000097

For more information, visit: [www.prisma-statement.org](http://www.prisma-statement.org).

Page 2 of 2

1  
2  
3  
4  
5  
6  
7  
8  
9  
10  
11  
12  
13  
14  
15  
16  
17  
18  
19  
20  
21  
22  
23  
24  
25  
26  
27  
28  
29  
30  
31  
32  
33  
34  
35  
36  
37  
38  
39  
40  
41  
42  
43  
44  
45  
46  
47  
48  
49  
50  
51  
52  
53  
54  
55  
56  
57  
58  
59  
60

# BMJ Open

## The Current Provision of Community-Based Teaching in UK Medical Schools: An Online Survey and Systematic Review.

|                                 |                                                                                                                                                                                                                                                           |
|---------------------------------|-----------------------------------------------------------------------------------------------------------------------------------------------------------------------------------------------------------------------------------------------------------|
| Journal:                        | <i>BMJ Open</i>                                                                                                                                                                                                                                           |
| Manuscript ID:                  | bmjopen-2014-005696.R1                                                                                                                                                                                                                                    |
| Article Type:                   | Research                                                                                                                                                                                                                                                  |
| Date Submitted by the Author:   | 12-Sep-2014                                                                                                                                                                                                                                               |
| Complete List of Authors:       | Lee, Sandra; School of Medicine, University of Nottingham<br>Clement, Naomi; School of Medicine, University of Nottingham<br>Tang, Natalie; School of Medicine, University of Nottingham<br>Atiomo, William; School of Medicine, University of Nottingham |
| <b>Primary Subject Heading</b>: | Medical education and training                                                                                                                                                                                                                            |
| Secondary Subject Heading:      | General practice / Family practice, Patient-centred medicine, Health policy                                                                                                                                                                               |
| Keywords:                       | EDUCATION & TRAINING (see Medical Education & Training), MEDICAL EDUCATION & TRAINING, PRIMARY CARE                                                                                                                                                       |
|                                 |                                                                                                                                                                                                                                                           |

SCHOLARONE™  
Manuscripts

Peer review only

## The current provision of community-based teaching in UK medical schools: an online survey and systematic review

Sandra WW Lee<sup>1</sup>, Naomi Clement (BMedSci)<sup>1</sup>, Natalie Tang (BMedSci)<sup>1</sup>, William Atiomo (DM FRCOG)<sup>2</sup>

<sup>1</sup> School of Medicine, University of Nottingham, Queen's Medical Centre, NG7 2UH, United Kingdom.

<sup>2</sup> Clinical Sub-Dean, School of Medicine, University of Nottingham, NG7 2UH United Kingdom.

*The lead author affirms that this manuscript is an honest, accurate, and transparent account of the study being reported; that no important aspects of the study have been omitted; and that any discrepancies from the study as planned (and, if relevant, registered) have been explained*

Correspondence to:

Naomi Clement

Email: [msxnc@nottingham.ac.uk](mailto:msxnc@nottingham.ac.uk)

Telephone: 0115 978 5800

Fax: 0115 8230759

For extra data please contact the above

*The Corresponding Author has the right to grant on behalf of all authors and does grant on behalf of all authors, a worldwide licence to the Publishers and its licensees in perpetuity, in all forms, formats and media (whether known now or created in the future), to i) publish, reproduce, distribute, display and store the Contribution, ii) translate the Contribution into other languages, create adaptations, reprints, include within collections and create summaries, extracts and/or, abstracts of the Contribution, iii) create any other derivative work(s) based on the Contribution, iv) to exploit all subsidiary rights in the Contribution, v) the inclusion of electronic links from the Contribution to third party material where-ever it may be located; and, vi) licence any third party to do any or all of the above.*

## The current provision of community-based teaching in UK medical schools: an online survey and systematic review

Authors: Sandra WW Lee, Naomi Clement (BMedSci), Natalie Tang (BMedSci), William Atiomo (DM FRCOG)

### Abstract:

#### **Objective**

To evaluate the current provision and outcome of community-based education (CBE) in UK medical schools.

#### **Design & Data Sources**

An online survey of UK medical school websites and course prospectuses and a systematic review of articles from PubMed and Web of Science were conducted. Articles in the systematic review were assessed using Rossi, Lipsey and Freeman's approach to programme evaluation.

#### **Study Selection**

Publications from November 1998 to 2013 containing information related to community teaching in undergraduate medical courses were included.

#### **Results**

Out of the 32 undergraduate UK medical schools, one was excluded due to the lack of course specifications available online. Analysis of the remaining 31 medical schools showed that a variety of CBE models are utilised in medical schools across the UK. 28 medical schools (90.3%) provide CBE in some form by the end of the first year of undergraduate training, and 29 medical schools (93.5%) by the end of the second year.

From the 1378 references identified, 29 papers met the inclusion criteria for assessment. It was found that CBE mostly provided advantages to students as well as other participants, including GP tutors and patients. However, there were a few concerns regarding the lack of GP tutors' knowledge in specialty areas, the negative impact that CBE may have on the delivery of health service in education settings and the cost of CBE.

#### **Conclusions**

Despite the wide variations in implementation, community teaching was found to be mostly beneficial. To ensure the relevance of CBE for "Tomorrow's Doctors", a national framework should be established, and solutions sought to reduce the impact of the challenges within CBE.

#### **Strengths and Limitations of this Study**

This is the first study to review how community-based education is currently provided throughout Medical Schools in the UK. The use of Rossi, Lipsey and Freeman's method of programme evaluation means that the literature was analysed in a consistent and comprehensive way. However, a weakness is that data from the online survey was obtained from online medical school prospectuses. This means the data may be incomplete or out of date. Data in the literature review may also be skewed by publication bias.

## The current provision of community-based teaching in UK medical schools: an online survey and systematic review

### Introduction

The context of healthcare in the UK is changing, with an increasingly aging population and a growing focus on the prevention and management of disease.<sup>1</sup> This has prompted the need to ensure that medical graduates are adequately prepared to address these evolving health care needs, rather than maintaining a reactive approach to illness in the UK. These needs include the prevention and management of chronic health conditions such as diabetes, heart disease, cancer and other long-term illnesses. The promotion of health as well as the delivery of care of conditions like these often occurs within the community, outside the context of University teaching hospitals - provided by professionals from several disciplines, including a significant input from social services. In the recently published UK government's white paper, *Equity and Excellence: Liberating the NHS*,<sup>2</sup> a need for a healthcare system focused on personalised care reflecting individuals' health and care needs was outlined. This would involve supporting carers and encouraging multidisciplinary care. These social demographic and political drivers require strong input from multi-professional healthcare providers in primary care and the recruitment of more General Practitioners (GPs) in order to fulfil the growing need for community-based care.

This concept also resonates globally and is considered important by health regulatory bodies that licence medical schools. In 1987, the World Health Organisation (WHO) recommended the reform of health professional curricula by incorporating methods to prepare students for providing care at all levels of health care settings,<sup>3</sup> which can be achieved by, among other things, aligning education with community needs. The UK General Medical Council's (GMC's) document "*Tomorrow's Doctors*" recommend that clinical placements should reflect the changing patterns of healthcare and that they

1  
2  
3 must provide experience in a variety of environments including hospitals, general practices and  
4  
5 community medical services.<sup>4</sup>  
6  
7

8 Curricula in the UK medical schools, therefore, currently offer community-based education (CBE) in  
9  
10 various forms and models of teaching.<sup>5</sup> CBE is defined as a medical education programme that may  
11  
12 employ any variety of teaching methods to promote an understanding of health concerns at a  
13  
14 community level. The programme is set within the community, and involves individuals within the  
15  
16 community.  
17  
18

19  
20 Previous publications have evaluated these models of medical teaching in the community, including  
21  
22 analyses of their advantages and drawbacks.<sup>6-28</sup> However, a thorough literature search (as  
23  
24 conducted in November 2013) found no existing systematic reviews on community-based teaching  
25  
26 across all existing UK medical schools. It remains unclear what the extent of community-based  
27  
28 teaching in UK medical schools is, the impact this had made to the standards of healthcare, and how  
29  
30 the effectiveness of community-based teaching programmes has been measured. Knowledge of this  
31  
32 is considered important, as it would guide the structuring of undergraduate medical curricula to  
33  
34 adapt to changing contexts in the UK, hence effectively developing a future generation of doctors  
35  
36 who are appropriately prepared for upcoming health care needs. The aim of this study, therefore,  
37  
38 was to conduct an online survey of the current provision of community-based teaching within UK  
39  
40 undergraduate medical schools to appreciate the extent of implementation. A systemic review was  
41  
42 also conducted to comprehensively evaluate community-based teaching in UK medical curricula on  
43  
44 the domains of programme needs, implementation, impact, and cost.  
45  
46  
47  
48  
49  
50  
51  
52  
53  
54  
55  
56  
57  
58  
59  
60



## Methods

### *Online Survey*

An online survey of the current provision of community-based teaching in UK medical curricula was completed by NC through accessing official online material of medical schools between 31st November 2013 and 8th December 2013. An up-to-date list of all the registered medical schools was obtained from the Medical Schools Council (MSC) website on 31st November 2013.<sup>29</sup> All graduate-entry courses were excluded. This was due to the wide variations of graduate-entry course structure, as well as the lack of literature on post-graduate community-based medical education. This was a prerequisite in order for the results of both the online survey and systematic review to be evaluated in parallel.

Online material of the undergraduate medical curriculum was sourced using the Google search engine, and included content from university websites or online course prospectuses for the 2014 intake. The information search was specific to descriptions of both mandatory and elective components of the curriculum relating to “primary care”, “general practice”, or “community medicine”.

### *Systematic Review: Data Sources*

A systematic literature review was conducted using the electronic databases PubMed and Web of Science to source for papers published on undergraduate community-based medical education. With the understanding that community-based education has evolved over the years, only publications published within the last 15 years, from November 1998 to 2013, were included in this study. The search criteria was (“community-based”, “community-oriented”, “community involvement”, or “primary health care”) and (“medical curriculum”, “medical students”, “undergraduate medical education” or “undergraduate medical school”).

## *Systematic Review: Selection criteria & Data Extraction*

The relevance of the articles was screened by the title and abstract, based on the inclusion and exclusion criteria. Articles were selected if they described undergraduate medical education within the UK. Papers that included healthcare professionals apart from medical students were excluded. Any articles that were duplicated, not available in full text, or not published in English were also regarded as unsuitable for the review. In total, 29 peer-reviewed articles were identified as relevant, and were selected for further qualitative content analysis by SL and NT (see figure 1). Data on the following were extracted from each article: (1) Format of CBE; (2) Type of evaluation used to assess the programme; (3) Findings of this evaluation; and (4) Method of data collection. Rossi, Lipsey and Freeman's (2004) approach to programme evaluation was adopted to systematically categorise the evaluation findings on CBE (see Table 1). The domains applicable to this study were the needs assessment, implementation assessment, impact assessment, and cost assessment. The impact assessment was further sub-categorised into the impact on students (target population of CBE), and the impact on others involved in CBE programmes.

Abstraction of data was performed independently by reviewers SL and NT. Themes were also independently drawn from data analysis of the impact assessments on students. Disagreements between the two reviewers were resolved by arriving at a consensus.

## **Results**

### *Current provision of community-based teaching in UK medical schools*

We were able to obtain information from the medical school websites about the provision of community-based teaching in all 32 undergraduate medical schools, and this is outlined in Table 2 and summarised in Table 3. All undergraduate medical schools provided some form of community-

1  
2  
3 based teaching or placement. There was, however, variation in the structure, duration and time in  
4  
5 the course when community teaching was delivered (see Table 2 and Table 3). CBE mainly took the  
6  
7 form of clinical placements, patient studies, and optional modules. The duration of community-  
8  
9 based teaching or placements varied from half day visits to various community settings (as  
10  
11 undertaken in schools such as Hull York, Newcastle, Nottingham and St George's) to a year-long  
12  
13 module on primary care and population medicine (as undertaken in Brighton & Sussex). Analysis of  
14  
15 the varying formats of CBE (with the exclusion of Norwich, due to the lack of year-by-year curriculum  
16  
17 details) revealed that most medical schools (a total of 31) provide early exposure to general practice  
18  
19 or community teaching. 28 medical schools (90.3%) provide community teaching from the first year  
20  
21 of undergraduate medical education. By the end of the second year of pre-clinical education,  
22  
23 students of 29 medical schools (93.5%) would have received some form of community-based  
24  
25 teaching.  
26  
27

28  
29  
30 The most popular form of community-based teaching within medical schools was GP placements  
31  
32 with 83.9% (26 schools from a total of 31) providing GP placements within the first two years of  
33  
34 study. Patient studies were the least common form of placements. These were defined as projects  
35  
36 where students visited patients within the community or at home. Only 38.7% (12 schools) provided  
37  
38 this format of community education at some point in their courses.  
39

40  
41 Fourteen (45.2%) medical schools provided regular exposure to community teaching in every year or  
42  
43 phase of the course.  
44

45  
46 With regards to optional modules offered to students, only three of the medical schools offered  
47  
48 them – 9.7%. This implies that, if students are particularly interested in community care, they may  
49  
50 find it difficult to achieve extra studies in this area.  
51

52  
53  
54 *Literature review of studies evaluating community-based teaching*  
55  
56  
57  
58  
59  
60

1  
2  
3 A summary of the studies evaluated in the systematic literature review are outlined in Table 4. The  
4  
5 main methods of evaluation employed in the studies were questionnaires, interviews, and focus  
6  
7 groups of the key stakeholders in CBE - students, patients, tutors and other staff in the community  
8  
9 setting.  
10

### 11 *Needs Assessment of CBE*

12  
13  
14  
15  
16 Studies of student expectations of CBE highlighted that students valued experiential patient-centred  
17  
18 learning and tutor supervision in the community setting.<sup>14, 30</sup> In a Sheffield study,<sup>14</sup> students also  
19  
20 recognised that CBE was a powerful vehicle for changing their approach to medicine and illness,  
21  
22 where the patient as a person is given emphasis over the disease.  
23

### 24 *Implementation Assessment of CBE*

25  
26  
27  
28 All forms of community-based teaching were generally well-received by medical students, patients,  
29  
30 and participating health care professionals, supporting the continuation of existing community-  
31  
32 based teaching programmes in the future. This included community-based teaching which was  
33  
34 incorporated into specialty modules such as Obstetrics and Gynaecology<sup>31</sup>, Psychiatry<sup>22</sup> and  
35  
36 Surgery<sup>27</sup>. The unique approach of incorporating primary healthcare in an intercalated Bachelor of  
37  
38 Science medical research year also received positive feedback<sup>23</sup>.  
39

40  
41  
42 Three studies found that students preferred the implementation of practice-based teaching over  
43  
44 hospital-based teaching. Hastings *et al.* found that students in Leicester preferred practice-based  
45  
46 teaching on the grounds of both teaching method and content.<sup>11</sup> O'Sullivan *et al.* had similar findings  
47  
48 among students from University College London, where practice-based teaching bore qualities of  
49  
50 better teaching attitudes, teaching methods, and course organisation.<sup>12</sup> Interestingly, these findings  
51  
52 were consistent with Powell and Easton's investigation on Imperial College students undertaking  
53  
54 their surgery module.<sup>27</sup> These students preferred surgical teaching within general practices due to  
55  
56  
57  
58  
59  
60

1  
2  
3 the learner-centred approach in teaching, more protected teaching time, and regular access to  
4  
5 suitable patients for acquiring clinical skills.  
6

7  
8 The success of community teaching in Leicester was analysed by Hastings *et al.*<sup>11</sup> It was found that  
9  
10 the improved quality of teaching by GP tutors was attributed to a higher proportion of GP tutors  
11  
12 attending teacher-training courses. General practices were also found to have greater resource  
13  
14 availability and NHS funding specifically allocated to support the teaching of medical  
15  
16 undergraduates. All these factors placed hospital doctors at a disadvantage in preparing good-  
17  
18 quality clinical teaching sessions in comparison to General Practitioners.  
19

### 20 21 *Impact Assessment of CBE*

22  
23  
24  
25 *Studies of CBE impact on students bore the following themes: (1) Learning Outcomes, (2) Behavioural*  
26  
27 *Changes to Primary Care, and (3) Traits of Future Doctors.* These are summarised in Figure 2.  
28

29  
30 CBE also had an impact on participating doctors, staff, patients and medical schools. A summary of  
31  
32 this is shown in Figure 3.  
33

### 34 35 *Impact on Students: Learning Outcomes*

36  
37  
38 Implementation of CBE in medical schools had a significant positive impact on medical students'  
39  
40 learning outcomes. The following results provide evidence of the strong educational value among  
41  
42 students: Eleven studies showed that medical students gained insight into patient-centred medicine  
43  
44 and continuity of care, which were learning outcomes that students viewed as important in their  
45  
46 education.<sup>10, 13, 17, 19-21, 23, 25-26, 28, 32</sup> This was measured quantitatively through questionnaires that  
47  
48 were administered to students, supplemented by quantitative feedback gathered from focus groups  
49  
50 and interviews.  
51

52  
53  
54 Students' appreciation and understanding of the role of primary care was found in four studies.<sup>20-21,</sup>  
55  
56<sup>28, 32</sup> This was revealed through questionnaires, where students rated the extent of their  
57  
58  
59  
60

1  
2  
3 understanding of primary care and its relationship with other levels of care. Two studies reported  
4  
5 the benefit of community placements in broadening the student's awareness of teamwork in multi-  
6  
7 disciplinary teams.<sup>19, 30</sup> Another study reported the positive finding of successfully exposing students  
8  
9 to a broad and varied range of clinical problems in a community setting.<sup>33</sup>  
10

11  
12 In comparison to hospital-based teaching, improved confidence in clinical skills and competencies  
13  
14 was found to be a favourable outcome of CBE in four studies.<sup>10, 12, 19, 20</sup> This finding was derived from  
15  
16 questionnaires and focus group interviews from students who had experienced CBE.  
17

18  
19 Two studies found no difference in academic performance between students under CBE and  
20  
21 'traditional' hospital-based teaching.<sup>17, 20</sup> One study of students who undertook a specialty  
22  
23 placement in Obstetrics and Gynaecology also found that there was no difference in clinical  
24  
25 performance as rated by their tutors, and no statistically significant difference in student final  
26  
27 clerkship grades.<sup>34</sup>  
28

29  
30 Although most evaluations produced consistent evidence on the benefits of community teaching,  
31  
32 two studies highlighted the lack of in-depth knowledge of specialist teaching when conducted by GP  
33  
34 tutors: the significance of this finding was measured qualitatively through student interviews,<sup>27</sup> and  
35  
36 quantitatively through academic scores for the respective specialty modules.<sup>34</sup>  
37  
38

### 39 40 *Impact on Students: Behavioural Changes to Primary Care*

41

42  
43 Two studies found that the implementation of CBE resulted in a reversal of negative attitudes  
44  
45 towards primary care, and an increase of interest in General Practice as a career option among  
46  
47 students.<sup>23, 32</sup>  
48

### 49 50 *Impact on Students: Traits of Future Doctors*

51

52  
53 Studies also showed that medical graduates from curricula with increased emphasis on community-  
54  
55 based teaching were at no disadvantage to graduates from the traditional hospital-based teaching.  
56  
57  
58  
59  
60

1  
2  
3 17, 33 Academically, graduates from a community-based curriculum performed as well as their  
4  
5 counterparts on their final formative assessments. Moreover, graduates from curricula where  
6  
7 community-based teaching had been offered had the advantage of increased confidence in  
8  
9 communication skills and clinical skill competencies. This outcome of CBE was evaluated in three  
10  
11 studies.<sup>17, 20, 28</sup> Two of these three studies additionally reported that graduates felt less confident in  
12  
13 their medical knowledge on disease processes.<sup>20, 28</sup> However, there was no evident difference found  
14  
15 in comparison to graduates of 'traditional' programmes of old medical curricula which had no CBE  
16  
17 component when measured by academic results and feedback from educational supervisors.<sup>20, 28</sup>  
18  
19

### 20 21 *Impact on Others Involved in CBE Programmes*

22  
23  
24 In three studies, it was found that GP tutors and participating staff had both role satisfaction and  
25  
26 development of professional and personal ethics.<sup>7, 13, 24</sup> Grant and Robling also found strengthened  
27  
28 team ethics between members of the primary health care team.<sup>24</sup>  
29

30  
31 Doctors and staff, however, were found to have organisational issues in juggling community teaching  
32  
33 with practice commitments. The expense of one over the other was described in CBE implemented  
34  
35 by the University of Birmingham.<sup>7</sup> The unfavourable outcome of blurred boundaries in the doctor-  
36  
37 patient relationship was also reported as a concern in two studies.<sup>18, 22</sup>  
38  
39

40  
41 Five studies evaluated the positive patient outcomes of CBE: Four of these studies reported the  
42  
43 beneficial sense of empowerment that patients gained from participating in community teaching.<sup>9,</sup>  
44  
45 <sup>21-22, 24</sup> The remaining study reported that patients developed feelings of altruism from helping  
46  
47 medical students in their education.<sup>18</sup>  
48

49  
50 Apart from gaining a sense of empowerment, Walters *et al.* also reported the development of a  
51  
52 more balanced doctor-patient relationship, and a therapeutic benefit for the patients as a result of  
53  
54 talking to students about their medical condition.<sup>22</sup>  
55  
56  
57  
58  
59  
60

1  
2  
3 Among these five studies on patient outcomes, two studies included further evaluations on the  
4 negative impact that resulted from patient participation. The negative outcomes comprised,  
5 reinforced feelings of ill-health which may be distressing or anxiety-provoking, and concerns of  
6 breaching patient confidentiality.<sup>18, 22</sup>  
7  
8  
9  
10

11 Powel *et al.*'s evaluation also shed light on the benefits that medical schools gained from tapping  
12 into teaching within the community. By doing so, medical schools were able to increase the  
13 availability of learning opportunities to medical students.<sup>27</sup>  
14  
15  
16  
17

18 Two studies raised the possibility of the negative impact that CBE would have on hospital tutors.<sup>7, 13</sup>  
19 The concern raised in these studies was with regards to a shift of focus away from teaching  
20 conducted by hospital-based tutors, and towards an emphasis on teaching in the community.  
21  
22  
23  
24

### 25 *Cost Assessment of CBE*

26  
27  
28  
29

30 Only one study evaluated the costs of running a community-based course. An evaluation of CBE in  
31 Cambridge revealed that the programme was cost-feasible as the total expenditure on one student-  
32 year of community-based teaching was within the cost estimates of Service Increment for Teaching  
33 (SIFT) funding.<sup>17</sup> The study also noted that the balance between placement costs and facilities costs  
34 stood at a ratio of approximately 2:1, which is a reverse of the traditionally allocated 1:4 ratio in SIFT  
35 funds. This finding implied that the traditional allocations for SIFT funds would be inappropriate  
36 when applied to community-based teaching.  
37  
38  
39  
40  
41  
42  
43  
44  
45  
46  
47

### 48 **Discussion**

49

50 This study was conducted to analyse the current provision of community-based education across  
51 undergraduate medical schools in the UK. All medical schools were found to offer some community-  
52 based teaching in their curricula, which falls in line with the recommendations of the WHO and the  
53 GMC which also follows the social demographic and political changes within the UK. Furthermore, a  
54  
55  
56  
57  
58  
59  
60



1  
2  
3 significant proportion of medical schools offered community-based teaching early in the medical  
4  
5 course. The benefits of this early exposure is explored by Dornan *et al.*, where the opportunity to  
6  
7 learn in context of clinical settings enabled students to develop an awareness of their interpersonal  
8  
9 skills, attitudes and abilities.<sup>35,36</sup>  
10

11  
12 In general, community-based teaching was well-received by medical students due to its good  
13  
14 educational value on many levels of learning outcomes. It also gave students insight into the option  
15  
16 of General Practice as a future career. This is consistent with the direction of travel the UK  
17  
18 healthcare workforce needs to address due to the changing demographics and the emphasis  
19  
20 changing in health care delivery from management to prevention. Not only was community-based  
21  
22 teaching of value to students, but it was also found to produce medical graduates of equal clinical  
23  
24 skills and competencies to their counterparts who were taught under the 'traditional' hospital-based  
25  
26 medical programme.<sup>17,33</sup> This outcome is consistent with findings in Australian medical schools  
27  
28 which showed that students generally did as well as or, in some areas of clinical competencies, even  
29  
30 better than their counterparts who received hospital-based teaching<sup>7</sup>. Community-based teaching  
31  
32 in medicine was also beneficial to medical schools in maximising the sources of available learning  
33  
34 opportunities for medical students.<sup>27</sup> Moreover, community-based teaching in medicine was found  
35  
36 to offer a unique opportunity to foster inter-professional learning – an outcome that is consistent  
37  
38 with the political drivers for better patient care.<sup>37</sup>  
39  
40  
41

42 Although it was evident that community-based teaching has a vast array of benefits, several  
43  
44 drawbacks were identified and underscored as challenges to the implementation of CBE. Studies  
45  
46 reflected the challenges of general practice tutors lacking adequate knowledge in specialty areas,<sup>27</sup>  
47  
48 and community teaching having a negative impact on the delivery of health service in some general  
49  
50 practices.<sup>7</sup> Murray and Modell discuss possible solutions to these issues, such as the development of  
51  
52 university-linked practices that would scrutinise the effectiveness of teaching.<sup>38</sup> It is imperative that  
53  
54 these solutions are explored and tested in current CBE programmes so that the impact of  
55  
56  
57  
58  
59  
60

1  
2  
3 programme drawbacks may be reduced. This would be the way-forward to strengthening the  
4  
5 implementation of CBE in medical curricula.  
6  
7

8 An assortment of models were seen to be used for community-based teaching in the UK, where  
9  
10 programmes varied in their methods of delivery, durations of exposure and points of undergraduate  
11  
12 education at which the teaching was delivered. This is congruous with guidance from the GMC  
13  
14 publication “Tomorrow’s Doctors”, which states that it was for each medical school to design its own  
15  
16 curriculum to suit its own circumstance. It should be noted that community-based education broadly  
17  
18 encompasses varied delivery formats, including both clinical and non-clinical experiences.  
19  
20 Unfortunately, the diversification of CBE poses a challenge for developing a standardised set of  
21  
22 criteria for evaluating the outcomes of CBE. Consequently, it becomes difficult to establish a national  
23  
24 framework for quality assurance of medical curricula, and to make recommendations for improving  
25  
26 the implementation of CBE.  
27  
28

29  
30 In order to achieve the expectations laid out for “Tomorrow’s Doctors”,<sup>4</sup> there is a principal need to  
31  
32 define the competencies that are required to prevent illness and promote health in the primary care  
33  
34 or community-based setting. Ladhani *et al.*, for example, categorised six themes of community-  
35  
36 based education competencies within nursing and medicine: public health; cultural diversity;  
37  
38 leadership and management; community development and advocacy; research and evidence-based  
39  
40 practice; and generic competencies.<sup>38</sup> Subsequently, a national framework may be derived from  
41  
42 these key competencies so as to measure the effectiveness of community-based teaching in  
43  
44 achieving these targeted goals.  
45  
46

47 The development of a national framework was explored and suggested by Cotton *et al.*,<sup>39</sup> where a  
48  
49 list of criteria for quality practice-based teaching in the UK was consensually derived from views of  
50  
51 medical educators and students at a national conference. However, since its development, there has  
52  
53 been no literature found on the use of these criteria to objectively evaluate community-based  
54  
55 education at a local, regional or national level. More work in this area should be encouraged to  
56  
57 achieve a national standard for community-based education in the UK.  
58  
59  
60

1  
2  
3 Little data was found on the cost implications of community-based teaching. Given the wide  
4  
5 variations in the format of CBE programmes conducted across the UK, it is difficult to make general  
6  
7 conclusions about the cost impact of community-based teaching. Nonetheless the findings from  
8  
9 Oswald *et al.*'s study sets a benchmark for other similar community teaching within the UK.<sup>17</sup> Oswald  
10  
11 *et al.* found that the absolute costs per student session of community teaching was within the  
12  
13 budgets of SIFT funding. The cost-feasibility implied in this study is consistent with Murray *et al.*'s  
14  
15 1993 study of the University College London teaching programme,<sup>40</sup> where community teaching cost  
16  
17 £60 per student session, comparing well with the SIFT provision of £64 per student session.  
18  
19 However, Oswald *et al.* discusses that the national formula for SIFT funds is inappropriate for  
20  
21 community teaching due to a mismatch in the 2:1 ratio of placement costs and facilities costs in  
22  
23 community teaching, versus the traditionally allotted 1:4 SIFT ratio between placement costs and  
24  
25 facilities costs. SIFT funding to medical education institutions is traditionally divided to cater for the  
26  
27 costs of clinical placements (about 20%) and the costs of facilities (80%). The 1995 Winyard Report  
28  
29 specified that the use of SIFT funding would support teaching conducted in settings other than the  
30  
31 main university hospital, such as in general practices and community settings.<sup>41</sup> This report  
32  
33 unfortunately failed to realise the inappropriateness of applying the 1:4 formula (for facilities and  
34  
35 placement costs) in the context of primary care. The allocation of 80% SIFT funding to facilities  
36  
37 would be disadvantageous to community-based teaching since this money will be retained for usage  
38  
39 within the hospital setting. It is important that the provision of SIFT funding is reconsidered so that it  
40  
41 suits a growing emphasis of community-based education in the medical curriculum and therefore  
42  
43 help develop these settings as centres of education.  
44  
45  
46  
47

48 The strengths of our study are that it provides the most up-to-date picture of the UK landscape of  
49  
50 community-based teaching in medical schools and the fact that the literature review was conducted  
51  
52 in a systematic way. The use of Rossi, Lipsey and Freeman's widely accepted approach to  
53  
54 programme evaluation also ensured that programme evaluations in the literature were analysed  
55  
56 comprehensively.  
57  
58  
59  
60

1  
2  
3 The weaknesses of the online survey are that it relied on data provided on the websites of medical  
4 schools which can occasionally be out of date and incomplete. The online survey also had the  
5 disadvantage of inconsistency in the extent of details provided online. For example, the online  
6 sources may not have mentioned details on clinical placements which are primarily hospital-based,  
7 but also provide supplementary clinical teaching within the community setting, (e.g. shadowing of a  
8 community midwife in an Obstetrics & Gynaecology placement). To address these weaknesses, the  
9 method of information collection may be improved by contacting course administrators to obtain  
10 detailed and focused information on any community-based teaching that is offered to students in all  
11 the course modules. The weaknesses of the literature review include that of publication bias. The  
12 majority of the papers included in the review were written in support of CBE, and there are very few  
13 publications which focused on the disadvantages of CBE. This imbalance may have skewed our data  
14 in favour of CBE.  
15  
16  
17  
18  
19  
20  
21  
22  
23  
24  
25  
26  
27  
28  
29  
30  
31

## 32 Conclusion

33  
34  
35 In this study, all undergraduate medical schools in the UK were found to offer some form of  
36 community-based teaching in their medical curriculum. The delivery of CBE varied broadly, but all  
37 forms of community teaching were generally found to be beneficial and was therefore well-received  
38 by students, patients, participating staff, and medical schools. The challenges and cost issues of  
39 community teaching should also not be overlooked, and solutions to address these need to be  
40 explored such that the delivery of CBE may be improved.  
41  
42  
43  
44  
45  
46  
47  
48

49 Under the pressures of social demographics and political drivers to incorporate more community-  
50 based teaching in medical education, there is a need to ensure that CBE is delivered at acceptable  
51 quality standards for it to achieve its anticipated benefits. A national framework would need to be  
52 established to ensure these standards are met. This would then succeed to act as a standardised  
53  
54  
55  
56  
57  
58  
59  
60

1  
2  
3 national guideline for evaluating the effectiveness of CBE programmes in developing professional  
4  
5 competencies that are expected of “Tomorrow’s Doctors”.  
6  
7

### 8 **Competing Interests**

9  
10  
11 We have read and understood BMJ policy on declaration of interests and declare that we have no  
12 competing interests.  
13

### 14 **Authors’ Contributions**

15  
16  
17 WA came up with the concept of the study, NC performed the Medical School online survey and SL  
18 and NT the Literature Review. SL, NC and NT wrote the draft of the manuscript and editing was  
19 performed by SL, NC, NT and WA.  
20  
21

### 22 **Data sharing**

23  
24  
25  
26  
27 No further data from this study is available.  
28  
29  
30  
31  
32  
33  
34  
35  
36  
37  
38  
39  
40  
41  
42  
43  
44  
45  
46  
47  
48  
49  
50  
51  
52  
53  
54  
55  
56  
57  
58  
59  
60

## References

- <sup>1</sup> *Our Priorities for 2013/14* [Internet]. London: Public Health England; [Updated 26 April 2013, Accessed January 2014]. Available from: <https://www.gov.uk/government/publications/public-health-englands-priorities-for-2013-to-2014>
- <sup>2</sup> *Equity and Excellence: Liberating the NHS* [Internet]. London: Department of Health; [Updated July 2010, Accessed January 2014]. Available from: <https://www.gov.uk/government/publications/liberating-the-nhs-white-paper>
- <sup>3</sup> *Community-based Education of Health Personnel: Report of a WHO Study Group* [Internet]. Geneva: World Health Organisation; [Updated November 1987. Accessed January 2014]. Available from: <http://apps.who.int/iris/handle/10665/41714>
- <sup>4</sup> *Tomorrow's Doctors* [Internet]. London: General Medical Council; [Updated 2009, Accessed January 2014]. Available from: [http://www.gmc-uk.org/education/undergraduate/tomorrows\\_doctors\\_2009.asp](http://www.gmc-uk.org/education/undergraduate/tomorrows_doctors_2009.asp)
- <sup>5</sup> Major SC, Booton P. Involvement of general practice (family medicine) in undergraduate medical education in the United Kingdom. *J Ambul Care Manage* 2008 September;31(3):269-75.
- <sup>6</sup> Davison H, Capewell S, Macnaughton J, Murray S, Hanlon P, McEwen J. Community-oriented medical education in Glasgow: developing a community diagnosis exercise. *Med Educ* 1999 January;33(2):55-62.
- <sup>7</sup> Parle J, Greenfield S, Thomas C, Ross N, Lester H, Skelton J, *et al*. Community-based clinical education at the University of Birmingham Medical School. *Acad Med* 1999 March;74(3):248-53.
- <sup>8</sup> Seabrook MA, Lempp H, Woodfield SJ. Extending community involvement in the medical curriculum: lessons from a case study. *Med Educ* 1999 November;33(11):838-45.
- <sup>9</sup> Stacy R, Spencer J. Patients as teachers: a qualitative study of patients' views on their role in a community-based undergraduate project. *Med Educ* 1999 September; 33(9):688-94.
- <sup>10</sup> Thistlethwaite JE, Jordan JJ. Patient-centred consultations: a comparison of student experience and understanding in two clinical environments. *Med Educ* 1999 September;33(9):678-85.
- <sup>11</sup> Hastings AM, Fraser RC, McKinley RK. Student perceptions of a new integrated course in clinical methods for medical undergraduates. *Med Educ* 2000 February;34(2):101-7.

- 1  
2  
3 12 O'Sullivan M, Martin J, Murray E. Students' perceptions of the relative advantages and  
4 disadvantages of community-based and hospital-based teaching: a qualitative study. *Med Educ* 2000  
5 August;34(8):648-55.  
6  
7  
8  
9 13 Thistlethwaite JE. Introducing community-based teaching of third year medical students: outcomes  
10 of a pilot project one year later and implications for managing change. *Educ Health* 2000;13(1):53-  
11 62.  
12  
13  
14 14 Howe A. Patient-centred medicine through student-centred teaching: a student perspective on the  
15 key impacts of community-based learning in undergraduate medical education. *Med Educ* 2001  
16 July;35(7):666-72.  
17  
18  
19  
20 15 Howe A, Ives G. Does community-based experience alter career preference? New evidence from a  
21 prospective longitudinal cohort study of undergraduate medical students. *Med Educ* 2001  
22 April;35(4):391-7.  
23  
24  
25  
26 16 Murray E, Alderman P, Coppola W, Grol R, Bouhuijs P, van der Vleuten C. What do students  
27 actually do on an internal medicine clerkship? A log diary study. *Med Educ* 2001  
28 December;35(12):1101-7.  
29  
30  
31  
32 17 Oswald N, Alderson T, Jones S. Evaluating primary care as a base for medical education: the report  
33 of the Cambridge Community-based Clinical Course. *Med Educ* 2001 August;35(8):782-8.  
34  
35  
36 18 Coleman K, Murray E. Patients' views and feelings on the community-based teaching of  
37 undergraduate medical students: a qualitative study. *Fam Pract* 2002 April;19(2):183-8.  
38  
39  
40 19 Gavin J, Lempp H, Elliman A, Grogan C. Teaching in partnership: linking a medical school and a  
41 community trust. *Br J Community Nurs* 2002 January;7(1):32-6.  
42  
43  
44 20 Jones A, McArdle PJ, O'Neill PA. Perceptions of how well graduates are prepared for the role of  
45 pre-registration house officer: a comparison of outcomes from a traditional and an integrated PBL  
46 curriculum. *Med Educ* 2002 January;36(1):16-25.  
47  
48  
49 21 Anderson ES, Lennox AI, Petersen SA. Learning from lives: a model for health and social care  
50 education in the wider community context. *Med Educ* 2003 January;37(1):59-68.  
51  
52  
53 22 Walters K, Buszewicz M, Russell J, Humphrey C. Teaching as therapy: cross sectional and  
54 qualitative evaluation of patients' experiences of undergraduate psychiatry teaching in the  
55 community. *BMJ* 2003 April;326(7392):740.  
56  
57  
58  
59  
60

- 1  
2  
3  
4  
5  
6  
7  
8  
9  
10  
11  
12  
13  
14  
15  
16  
17  
18  
19  
20  
21  
22  
23  
24  
25  
26  
27  
28  
29  
30  
31  
32  
33  
34  
35  
36  
37  
38  
39  
40  
41  
42  
43  
44  
45  
46  
47  
48  
49  
50  
51  
52  
53  
54  
55  
56  
57  
58  
59  
60
- <sup>23</sup> Jones M, Singh S, Lloyd M. "It isn't just consultants that need a BSc": student experiences of an Intercolated BSc in primary health care. *Med Teach* 2005 March;27(2):164-8.
- <sup>24</sup> Grant A, Robling M. Introducing undergraduate medical teaching into general practice: an action research study. *Med Teach* 2006 November;28(7):192-7.
- <sup>25</sup> Muir F. Placing the patient at the core of teaching. *Medical Teacher* 2007 March;29(2-3):258-260.
- <sup>26</sup> Mullen K, Nicolson M, Cotton P. Improving medical students' attitudes towards the chronic sick: a role for social science research. *BMC Med Educ* 2010 November;10:84.
- <sup>27</sup> Powell S, Easton G. Student perceptions of GP teachers' role in community-based undergraduate surgical education: a qualitative study. *JRSM Short Rep* 2012 August;3(8):51.
- <sup>28</sup> Watmough S. An evaluation of the impact of an increase in community-based medical undergraduate education in a UK medical school. *Educ Prim Care* 2012 November;23(6):385-90.
- <sup>29</sup> UK medical schools A-Z [Internet]. London: Medical Schools Council; [Accessed November 2013]. Available from: <http://www.medschools.ac.uk/Students/UKMedicalSchools/Pages/UK-Medical-Schools-A-Z.aspx>
- <sup>30</sup> Lennox A, Petersen S. Development and evaluation of a community-based, multiagency course for medical students: descriptive survey. *BMJ* 1998 February;316:596-599.
- <sup>31</sup> Nicholson S, Osonnaya C, Carter Yh, Savage W, Hennessy E, Collinson S. Designing a community-based fourth-year obstetrics and gynaecology module: an example of innovative curriculum development. *Med Educ* 2001 April;35(4):398-403.
- <sup>32</sup> Sinclair HK, Ritchie LD, Lee AJ. A future career in general practice? A longitudinal study of medical students and pre-registration house officers. *Eur J Gen Pract* 2006 April;12(3):120-7.
- <sup>33</sup> Alderson TS, Oswald NT. Clinical experience of medical students in primary care: use of an electronic log in monitoring experience and in guiding education in the Cambridge Community-based Clinical Course. *Med Educ* 1999 June;33(6):429-33.
- <sup>34</sup> Frattarelli LC, Kamemoto LE. Obstetrics and gynecology medical student outcomes: Longitudinal multispecialty clerkship versus traditional block rotations. *Am J Obstet Gynecol* 2004 November;191(5):1800-1804.
- <sup>35</sup> Dornan T, Bundy C. What can experience add to early medical education? Consensus Survey, *British Medical Journal* 2004; 32:834-840.



1  
2  
3  
4  
5  
6  
7  
8  
9  
10  
11  
12  
13  
14  
15  
16  
17  
18  
19  
20  
21  
22  
23  
24  
25  
26  
27  
28  
29  
30  
31  
32  
33  
34  
35  
36  
37  
38  
39  
40  
41  
42  
43  
44  
45  
46  
47  
48  
49  
50  
51  
52  
53  
54  
55  
56  
57  
58  
59  
60

<sup>36</sup>Dornan T, Littlewood S, Margolis SA, Scherpbier A, Spencer J, Ypinazar V. How can experience in clinical and community settings contribute to early medical education? A BEME systematic review. *Medical Teacher* 2006;28(1):3–18.

<sup>37</sup>Hosny S, Kamel MH, El-Wazir Y, Gilbert J. Integrating interprofessional education in community-based learning activities: case study. *Med Teach* 2013;35:S68-73

<sup>38</sup>Ladhani Z, Scherpbier AJ, Stevens FC. Competencies for undergraduate community-based education for the health professions--a systematic review. *Med Teach* 2012;34(9):733-43.

<sup>39</sup>Cotton P, Sharp D, Howe A, Starkey C, Laue B, Hibble A, *et al.* Developing a set of quality criteria for community-based medical education in the UK. *Educ Prim Care*. 2009 May;20(3):143–51.

<sup>40</sup>Murray E, Jinks V, Modell M. Community-based medical education: feasibility and cost. *Med Educ* 1995 January;29(1):66-71.

<sup>41</sup>NHS Executive. SIFT into the Future. Leeds: NHS Executive, 1995 (The Winyard Report).

#### Legend of figures and tables.

Figure 1. Flow chart of search strategy used in systematic review

Figure 2. Key Points: Impact of CBE on Students

Figure 3. Key Points: Impact of CBE on Other Participants in CBE

Table 1. Domains in Rossi, Lipsey and Freeman's approach to Programme Evaluation

Table 2. Community-based Teaching in Medical Schools in the UK

Table 3. Summary of Findings from Online Survey

Table 4. Summary of Systematic Review

**Table 1: Domains in Rossi, Lipsey and Freeman's Approach to Programme Evaluation**

| Domains of Programme Evaluation                                      |                                                                                                         |
|----------------------------------------------------------------------|---------------------------------------------------------------------------------------------------------|
| Needs Assessment                                                     | Examining the need in the population that the programme intends to target.                              |
| "Logic Model" Assessment (of programme conceptualisation and design) | Examining the plausibility of how the programme is supposed to achieve its aims.                        |
| Implementation Assessment                                            | Evaluation determines whether the programme addresses its target population with the intended services. |
| Impact Assessment                                                    | Determines the effectiveness of the programme in achieving its intended outcomes.                       |
| Efficiency assessment                                                | Analyses the cost-benefit or cost-effectiveness of the programme by comparing its benefits and costs.   |

1  
2  
3  
4  
5  
6  
7  
8  
9  
10  
11  
12  
13  
14  
15  
16  
17  
18  
19  
20  
21  
22  
23  
24  
25  
26  
27  
28  
29  
30  
31  
32  
33  
34  
35  
36  
37  
38  
39  
40  
41  
42  
43  
44  
45  
46  
47  
48  
49  
50  
51  
52  
53  
54  
55  
56  
57  
58  
59  
60

For peer review only

TABLE 2: An Outline Of Community-Based Teaching In Undergraduate Medical Courses Within The UK

|   |                                                                                                |                                                                                                                                                                                                                                                                                                                                                                                                                                                                                                                                                                                              |
|---|------------------------------------------------------------------------------------------------|----------------------------------------------------------------------------------------------------------------------------------------------------------------------------------------------------------------------------------------------------------------------------------------------------------------------------------------------------------------------------------------------------------------------------------------------------------------------------------------------------------------------------------------------------------------------------------------------|
| 1 | <b>Aberdeen (University of)</b>                                                                | <p><b>Year 1</b> –The "Community Course": including GP, Public Health, Mental Health, Environmental &amp; Occupational Medicine, HCE and Paediatrics; allowing learning about the social, economic and environmental impacts on health.</p> <p><b>Year 2</b> - The Community Course continues.</p> <p><b>Year 3</b> – The Community Course is completed.</p> <p><b>Year 4</b> - 5 week GP placement</p> <p><b>Year 5</b> – 8-week blocks of: (1) a medical speciality, (2) a surgical speciality, (3) a GP or psychiatry course, (4) an elective, and (5) a Professional Practice Block.</p> |
| 2 | <b>Barts and The London School of Medicine and Dentistry, Queen Mary, University of London</b> | <p><b>Years 1 &amp; 2</b> - regular GP placements</p> <p><b>Years 3 &amp; 4</b> – work with clinical teams both in the hospital and also within community placements.</p> <p><b>Year 5</b> - clinical and community placements, including GP surgeries.</p>                                                                                                                                                                                                                                                                                                                                  |
| 3 | <b>Birmingham (University of)</b>                                                              | <p><b>Years 1 &amp; 2</b> - 10 days per year spent in GP.</p> <p><b>Year 3</b> –Community Based Medicine module</p> <p><b>Years 4 &amp; 5</b> -- One GP attachment within these 2 years.</p>                                                                                                                                                                                                                                                                                                                                                                                                 |

|    |                                     |                                                                                                                                                                                                                                                                                                                                                                                                                                                                                                                                                                                                                                                                                                                                   |
|----|-------------------------------------|-----------------------------------------------------------------------------------------------------------------------------------------------------------------------------------------------------------------------------------------------------------------------------------------------------------------------------------------------------------------------------------------------------------------------------------------------------------------------------------------------------------------------------------------------------------------------------------------------------------------------------------------------------------------------------------------------------------------------------------|
| 4  | Brighton and Sussex Medical School  | <p><b>Years 1 &amp; 2</b> - 25% of learning is clinically based including experience in primary care, community medicine and out-patient settings. Patients do two family studies: One in year 1 ("family with a new baby"), and one in year 2 ("the chronic illness patient").</p> <p><b>Years 3 &amp; 4</b> - A year-long module on primary care and population medicine, alongside clinical placements both in hospital trusts and primary care.</p>                                                                                                                                                                                                                                                                           |
| 5  | Bristol (University of)             | <p><b>Year 1</b> - GP and patient home visits.</p> <p><b>Year 2</b> - clinical skills teaching in the primary care setting.</p> <p><b>Year 3</b> - teaching in both hospitals and in general practice.</p> <p><b>Year 4</b> - Two "Community Orientated Medical Practice" modules.</p> <p><b>Year 5</b> - 2 weeks in a GP placement (within preparation for Professional Practice)</p>                                                                                                                                                                                                                                                                                                                                            |
| 6  | Cambridge (University of)           | <p><b>Years 1</b> - meet patients in the GP.</p> <p><b>Years 2 &amp; 3</b> - Students meet patients through visiting community-based health-related agencies, as well as following a pregnant woman and her family throughout pregnancy (Year 3 project). Students also have primary care teaching in the following:</p> <ul style="list-style-type: none"> <li>- Module on the "Clinical Method" involves time spent in primary care, including teaching</li> <li>- Module on "The Life Course" involves time spent in primary and community care. Learning is focused on how diseases present, are managed and the patients' perspective.</li> <li>- Module on "Preparation for Practice" involves one GP attachment</li> </ul> |
| 7  | Cardiff University                  | <p><b>Year 1</b> - 12 week introductory programme involving short clinical experience days in GP .</p> <p><b>Years 1 &amp; 2</b> - one day a week seeing patients in hospitals, GP or other community based services.</p> <p><b>Year 5</b> - 8 week placement in the community.</p>                                                                                                                                                                                                                                                                                                                                                                                                                                               |
| 8  | Dundee (University of)              | <p>"Doctors, Patients and Communities" course runs throughout the undergraduate medical programme, allowing early patient contact. This course includes public health and primary care. Students submit a record of clinical experience.</p> <p><b>Years 4 &amp; 5</b> - Primary care attachments, with an option to extend the 5<sup>th</sup> year primary care attachment to 2 or 3 months.</p>                                                                                                                                                                                                                                                                                                                                 |
| 9  | Durham (University of)              | <p><b>Years 1 &amp; 2</b> - Community-based teaching in:</p> <ul style="list-style-type: none"> <li>- The "Patient Study" module involves observing the effect of a chronic condition on a person and their immediate family in primary care and the community.</li> <li>- The "Family Project" follows a pregnant woman and then the effect of having a new baby in a family.</li> <li>- The "Community Placement" with a variety of health and social care agencies, observing inter-professional and inter-agency working within the community. It may involve visiting patients at home and within primary care</li> </ul> <p><b>Years 3-5</b> - Medical programme completed at Newcastle University</p>                      |
| 10 | Edinburgh (The University of)       | <p><b>Years 1 &amp; 2</b> - Student have community projects, GP-based teaching and three student selected projects on a range of topics (can be clinical and non-medical)</p> <p><b>Years 3 &amp; 4</b> - "Further clinical experience" (<i>clinical setting not specified</i>)</p> <p><b>Year 5</b> - One placement in general practice</p>                                                                                                                                                                                                                                                                                                                                                                                      |
| 11 | Exeter (University of)              | <p><b>Years 1 &amp; 2</b> - Community placements</p> <p><b>Years 3 &amp; 4</b> - meet patients at home, in GP's, in acute and community hospitals.</p> <p><b>Year 5</b> - One community placement.</p>                                                                                                                                                                                                                                                                                                                                                                                                                                                                                                                            |
| 12 | Glasgow (University of)             | <p><b>First 15 weeks of Year 3</b> - Students develop clinical skills in the hospital and GP environment.</p> <p><b>Second half of Year 3, years 4 &amp; 5</b> - One GP placement</p>                                                                                                                                                                                                                                                                                                                                                                                                                                                                                                                                             |
| 13 | Hull York Medical School            | <p>Students alternate between a hospital and primary care setting in all clinical placements.</p> <p><b>Year 1</b> - Half a day each week on clinical placement.</p> <p><b>Year 2</b> - One day each week on clinical placement.</p> <p><b>Years 3 &amp; 4</b> - Clinical placements in both GP and hospitals.</p> <p><b>Year 5</b> - Medical student is treated as a junior member of the medical team. Students have a general practice rotation, in which they see patients and perform routine medical procedures under the supervision of the GP.</p>                                                                                                                                                                        |
| 14 | Imperial College School of Medicine | <p><b>Years 1 &amp; 2</b> - "The Patient Contact Course" (for chronic illnesses) involve students getting attached to one patient/family and visiting them at their homes and in the clinical setting. Learning is supplemented by GP and hospital visits.</p> <p><b>Year 3</b> - Learning basic clinical skills and methods in general practice.</p> <p><b>Year 5</b> - One GP &amp; Primary Health Care placement.</p> <p><b>Year 6</b> - 3 week "General Practice Student Assistantship" placement.</p>                                                                                                                                                                                                                        |
| 15 | Keele University                    | <p><b>Year 1</b> - Placements in GP setting.</p>                                                                                                                                                                                                                                                                                                                                                                                                                                                                                                                                                                                                                                                                                  |

|    |                                                                                             |                                                                                                                                                                                                                                                                                                                                                                                                                                                                                                                                                                                                                                                                                                                                                                                                                 |
|----|---------------------------------------------------------------------------------------------|-----------------------------------------------------------------------------------------------------------------------------------------------------------------------------------------------------------------------------------------------------------------------------------------------------------------------------------------------------------------------------------------------------------------------------------------------------------------------------------------------------------------------------------------------------------------------------------------------------------------------------------------------------------------------------------------------------------------------------------------------------------------------------------------------------------------|
|    |                                                                                             | <p><b>Year 2</b> - Students select a "third sector" placement from a range of community organisations.</p> <p><b>Year 3</b> - 4 weeks spent consolidating clinical skills in GP surgery.</p> <p><b>Year 4</b> - 4 weeks in general practice, as well as an option of a Special Study Component in GP.</p> <p><b>Year 5</b> - Longer GP placement. Students also work in small groups to identify community needs.</p>                                                                                                                                                                                                                                                                                                                                                                                           |
| 16 | King's College London School of Medicine (at Guy's, King's College and St Thomas' Hospital) | <p>Inter-professional education is embedded in the medical curriculum throughout the duration of the course.</p> <p><b>Year 1 (term 1)</b> – Students have their first experiences of primary care (visiting GP and interviewing patients) &amp; hospital.</p> <p><b>Phase 2 (3 terms)</b> - Continuing clinical contact in primary care attachments and GP visits</p> <p><b>Phase 3 (3 terms)</b> – Students study basic skills with a GP teacher. Each of the three placements involve community attachments.</p> <p><b>Phase 4 (3 13-weeks rotations)</b> - A "Community and Applied-Health Promotion Study" is done following a pregnant women and her family. Students also continue Multi-Disciplinary Team learning.</p> <p><b>Phase 5 (final year)</b> - One 8 week attachment in GP and community.</p> |
| 17 | Lancaster University                                                                        | <p><b>Year 1</b> – Students have a community attachment in the second term with health visitors</p> <p><b>Year 2</b> - One day per week on community attachment e.g. GP, community clinical teaching or community-related assessment.</p> <p><b>Year 3</b> – One GP placement with a focus on disability.</p> <p><b>Year 4</b> - One day per week in GP</p> <p><b>Year 5</b> – One community attachment.</p>                                                                                                                                                                                                                                                                                                                                                                                                    |
| 18 | Leeds (University of)                                                                       | <p><b>Year 1</b> – "Campus to Clinic" module (lasting half the academic year): students work in a healthcare team for 1 day per week, rotating between primary and secondary care. Medical students also arrange a community visit to a healthcare voluntary group close to their practice.</p> <p><b>Year 2</b> – "Campus to Clinic" module (lasting half the academic year).</p> <p><b>Year 3</b> - 5 week primary care placement.</p> <p><b>Year 5</b> - One placement (8 weeks) involves integrating teaching between primary and secondary care.</p>                                                                                                                                                                                                                                                       |
| 19 | Leicester (University of)                                                                   | <p><b>Phase 1 (First 5 Terms)</b> – Community attachments are undertaken to gain experience of the social implications of medicine. Study of social and behavioural sciences supplements these placements.</p> <p><b>Phase 2</b> – Time is spent in "innovative community attachments" to allow learning of the Multi-Disciplinary Team.</p>                                                                                                                                                                                                                                                                                                                                                                                                                                                                    |
| 20 | Liverpool (University of)                                                                   | <b>Years 2-5</b> – Hospital and community-based clinical experiences.                                                                                                                                                                                                                                                                                                                                                                                                                                                                                                                                                                                                                                                                                                                                           |
| 21 | Manchester (University of)                                                                  | <p><b>Year 1</b> - Community visits</p> <p><b>Year 3</b> - Community placements related to certain modules.</p> <p><b>Year 4</b> - Community and primary care teaching on further modules.</p> <p><b>Year 5</b> - Students work as part of the team in GP, community paediatrics or community psychiatry, running their own consultations and seeing patients independently.</p>                                                                                                                                                                                                                                                                                                                                                                                                                                |
| 22 | Newcastle University Medical School                                                         | <p><b>Year 1 &amp; 2</b> – Early clinical experience with full and half-days spent in GP practices and hospital visits. Students also do 2 patient studies: One "family study project" and one in-depth study of a patient with chronic illness.</p> <p><b>Year 3</b> – Half a day each week spent in General Practice.</p> <p><b>Year 5</b> – Primary Care clinical rotation including out-of-hours calls with GPs.</p>                                                                                                                                                                                                                                                                                                                                                                                        |
| 23 | Norwich Medical School, University of East Anglia                                           | <p><i>NB: No year-by-year information given.</i></p> <p>"Regular placements in both hospital and General Practice allow students to observe the full range of patient care"</p>                                                                                                                                                                                                                                                                                                                                                                                                                                                                                                                                                                                                                                 |
| 24 | Nottingham (The University of)                                                              | <p><b>Year 1 &amp; 2</b> – One morning every month spent with GP.</p> <p><b>Year 3</b> - "Community Follow Up Project" (starting in Year 2) is completed. Projects involves following an assigned patient for 18 months, and learning about the effects of the patients care on the patient and their family.</p> <p><b>Year 4</b> – One week Community Attachment during Obstetrics and Gynaecology placement and one day spent with a community midwife. Regular community visits during Paediatrics attachment (GP, Community Paediatrician, Health Visitor, and School Nurse). Students are also given an option of a Special Study Module in primary care.</p> <p><b>Year 5</b> - One 5 week GP placement.</p>                                                                                             |
| 25 | Oxford (University of)                                                                      | <p><b>Years 1 &amp; 2</b> – meeting patients in GP</p> <p><b>Year 4</b> – meeting patients in GP (2 weeks) and a GP Residential Attachment (1 week).</p> <p><b>Year 5</b> – One community placement (in clinical geratology, dermatology, palliative care, primary health care or public/ population health)</p> <p><b>Year 6</b> – optional 12-week special study module in primary care.</p>                                                                                                                                                                                                                                                                                                                                                                                                                  |
| 26 | Plymouth University,                                                                        | <b>Year 1</b> – Weekly practical community based work throughout the course, inclusive of "Sure Start" or                                                                                                                                                                                                                                                                                                                                                                                                                                                                                                                                                                                                                                                                                                       |

|    |                                             |                                                                                                                                                                                                                                                                                                                                                                                                                                                                                                                                       |
|----|---------------------------------------------|---------------------------------------------------------------------------------------------------------------------------------------------------------------------------------------------------------------------------------------------------------------------------------------------------------------------------------------------------------------------------------------------------------------------------------------------------------------------------------------------------------------------------------------|
|    | Peninsula Schools of Medicine and Dentistry | <p>drug clinic visits.</p> <p><b>Year 2</b> – GP practice visits on 6 separate days.</p> <p><b>Year 3 &amp; 4</b> – Students can see patients themselves in supervised settings in a General Practice during a week-long placement, three times in each year.</p> <p><b>Year 5</b> – 6 week long GP placement.</p>                                                                                                                                                                                                                    |
| 27 | Queen's University Belfast                  | <p><i>NB: Little information on course structure is available online</i></p> <p><b>Years 4 &amp; 5</b> - Teachings in GP</p>                                                                                                                                                                                                                                                                                                                                                                                                          |
| 28 | Sheffield (The University of)               | <p><b>Years 1 &amp; 2</b> - Community attachments within GPs &amp; some social services locations.</p> <p><b>Two years including second half of Year 3, Year 4 &amp; first half of Year 5</b> – One community health placement at GP.</p>                                                                                                                                                                                                                                                                                             |
| 29 | Southampton (University of)                 | <p><b>Years 1 &amp; 2</b> - Contact with patients in a variety of clinical settings, including a community engagement project.</p> <p><b>Year 3</b> – Students undertake a research study which may involve work with general practices or in the community. Students also undertake a GP clinical placement, focusing on the effects of clinical disorders on patients and their families.</p> <p><b>Year 4</b> - Range of clinical placements (<i>clinical setting not specified</i>).</p> <p><b>Year 5</b> – One GP placement.</p> |
| 30 | St Andrews (University of)                  | <p><b>Years 1 &amp; 2</b> - Regular primary care attachments in local hospitals.</p> <p><b>Between 2<sup>nd</sup> &amp; 3<sup>rd</sup> Year</b> - Optional residential week in a range of primary clinical care placements.</p> <p><b>Years 4 &amp; 5</b> – Medical programme completed at a "Partner Medical School" in Aberdeen, Dundee, Edinburgh, Glasgow or Manchester.</p>                                                                                                                                                      |
| 31 | St George's, University of London           | <p><b>Year 1</b> - Half days of GP and community visits.</p> <p><b>Year 3</b> - 3 week GP/primary care placement.</p> <p><b>Year 5</b> - 5 week placement in GP, 2 weeks in public health.</p>                                                                                                                                                                                                                                                                                                                                        |
| 32 | University College London                   | <p><b>Years 1 &amp; 2</b> - "Opportunities for early patient contact and for meeting health professionals".</p> <p><b>Year 4</b> - "Three long attachments in hospitals and associated community and GP settings" concentrating on community based care, ward based care and emergency care.</p> <p><b>Years 6</b> – 4-week GP placement</p>                                                                                                                                                                                          |

**Table 3 - Summary of Findings from Online Survey**

|    | Medical School                                   | Year of Study                                                     |                 |                 |                 |                 |                 |
|----|--------------------------------------------------|-------------------------------------------------------------------|-----------------|-----------------|-----------------|-----------------|-----------------|
|    |                                                  | 1st                                                               | 2 <sup>nd</sup> | 3 <sup>rd</sup> | 4 <sup>th</sup> | 5 <sup>th</sup> | 6 <sup>th</sup> |
| 1  | Aberdeen                                         | ●, 8                                                              | ●, 8            | ●, 8            | ●               | ●               | n/a             |
| 2  | Barts and Queen Mary                             | ●                                                                 | ●               | ●, 8            | ●, 8            | ●, 8            | n/a             |
| 3  | Birmingham                                       | ●                                                                 | ●               | 8               | ●               | ●               | n/a             |
| 4  | Brighton and Sussex                              | ●, 8,P                                                            | ●, 8,P          | ●, 8            | ●, 8            |                 | n/a             |
| 5  | Bristol                                          | ●, P                                                              | 8               | ●               | 8               | ●               | n/a             |
| 6  | Cambridge                                        | ●                                                                 | ●, 8,P          | ●, 8,P          |                 |                 |                 |
| 7  | Cardiff                                          | ●                                                                 | ●, 8            |                 |                 | 8               | n/a             |
| 8  | Dundee                                           | ●, 8                                                              | ●, 8            | ●, 8            | ●, 8            | ●, 8            | n/a             |
| 9  | Durham<br>(Year 3-5 completed in Newcastle)      | ●, 8,P                                                            | ●, 8,P          | n/a             | n/a             | n/a             | n/a             |
| 10 | Edinburgh                                        | ●, P                                                              | ●, P            |                 |                 | ●               | n/a             |
| 11 | Exeter                                           | ●, 8                                                              | ●, 8            | ●, 8,P          | ●, 8,P          | 8               | n/a             |
| 12 | Glasgow                                          |                                                                   |                 | ●               | ●               | ●               | n/a             |
| 13 | Hull York                                        | ●, 8                                                              | ●, 8            | ●               | ●               | ●               | n/a             |
| 14 | Imperial College                                 | ●, 8,P                                                            | ●, 8,P          | ●               |                 | ●, 8            | ●               |
| 15 | Keele                                            | ●                                                                 | 8               | ●               | ●, x            | ●               | n/a             |
| 16 | King's College London                            | ●, 8,P                                                            | ●, 8            | ●, 8            | P               | ●, 8            | n/a             |
| 17 | Lancaster                                        | 8                                                                 | ●, 8            | ●               | ●               | 8               | n/a             |
| 18 | Leeds                                            | ●, 8                                                              | ●, 8            | ●, 8            | ●, 8            | ●, 8            | n/a             |
| 19 | Leicester                                        | ●, 8                                                              | ●, 8            | ●, 8            | ●, 8            | ●, 8            | n/a             |
| 20 | Liverpool                                        |                                                                   | 8               | 8               | 8               | 8               | n/a             |
| 21 | Manchester                                       | 8                                                                 |                 | 8               | ●, 8            | ●, 8            | n/a             |
| 22 | Newcastle                                        | ●, P                                                              | ●, P            | ●               |                 | ●               | n/a             |
| 23 | Norwich                                          | <i>no year by year breakdown - regular GP placements reported</i> |                 |                 |                 |                 |                 |
| 24 | Nottingham                                       | ●                                                                 | ●, P            | P               | ●, 8            | ●               | n/a             |
| 25 | Oxford                                           | ●, P                                                              | ●, P            |                 | ●, P            | 8               | x               |
| 26 | Plymouth                                         | 8                                                                 | ●               | ●               | ●               | ●               | n/a             |
| 27 | Queen's University Belfast                       |                                                                   |                 |                 | ●               | ●               | n/a             |
| 28 | Sheffield                                        | ●, 8                                                              | ●, 8            |                 | ●               | ●               | n/a             |
| 29 | Southampton                                      | ●, 8, P                                                           | ●, 8, P         | ●, 8, P         |                 | ●               | n/a             |
| 30 | St Andrews<br>(Year 4-5 completed in Manchester) | 8                                                                 | 8, x            |                 | n/a             | n/a             | n/a             |
| 31 | St George's, University of London                | ●, 8                                                              |                 | ●, 8            |                 | ●, 8            | n/a             |
| 32 | University College London                        | ●, 8                                                              |                 |                 | ●, 8            | ●               | n/a             |

●: GP Placement within curriculum

8: Community-Based Education - other than GP Placement - within the curriculum

P: Patient Studies within the community involving visiting the patient within the community or at home

x: Optional community-based module offered

TABLE 4: Summary of Systematic Review

|     | University                                            | Author (Year)              | Description of CBE                                                                                                                                              | Type of Evaluation                                                | Evaluation findings                                                                                                                                                                                                                                                                                                                                                                   | Evaluation method                                                            |
|-----|-------------------------------------------------------|----------------------------|-----------------------------------------------------------------------------------------------------------------------------------------------------------------|-------------------------------------------------------------------|---------------------------------------------------------------------------------------------------------------------------------------------------------------------------------------------------------------------------------------------------------------------------------------------------------------------------------------------------------------------------------------|------------------------------------------------------------------------------|
| 1.  | Aberdeen (University of)                              | Sinclair et al. (2006)     | Years 1-3: GP-led patient-centred tutorials and clinical sessions<br>Year 4: 5-week community-themed clinical rotation<br>Year 5: optional 7-week GP attachment | Impact Assessment                                                 | Increase in students interested in pursuing a career in GP as curriculum progressed<br><br>Exposure to community settings had positive effect on students' attitudes towards a career in general practice                                                                                                                                                                             | Questionnaire – Student Survey                                               |
| 2.  | Barts and The London School of Medicine and Dentistry | Nicholson et al. (2001)    | Year 4: Community-based Module prior to Obstetrics and Gynaecology hospital placement                                                                           | Implementation Assessment<br>Impact Assessment                    | Adequate clinical exposure within the community<br>Variation in opportunities to gain relevant experience in clinical exposure<br>Students found small-group learning and GP attitudes to be beneficial to their learning<br>Multi-disciplinary interaction enhanced their clinical experience<br>Successfully Incorporated specialty with community environment                      | Questionnaire – Student Feedback                                             |
| 3.  | Birmingham (University of)                            | Parle et al. (1999)        | Years 1-4: GP practice visits                                                                                                                                   | Implementation Assessment<br>Impact Assessment                    | Students found GP tutors to be encouraging<br>GP Tutors reported:<br>-Enhanced development of both students and GPs<br>-Organizational drawbacks                                                                                                                                                                                                                                      | Questionnaire – Student Feedback                                             |
| 4.  | Cambridge (University of)                             | Alderson and Oswald (1999) | 15-month attachment to GP practice                                                                                                                              | Implementation Assessment                                         | Adequate exposure of all clinical specialities was achieved<br>Individual experiences may vary due to variation in opportunities                                                                                                                                                                                                                                                      | Student Log Diary                                                            |
| 5.  | Cambridge (University of)                             | Oswald et al. (2001)       | 15-month attachment to GP practice                                                                                                                              | Implementation Assessment<br>Impact Assessment<br>Cost Assessment | Course was feasible in terms of organization and student logistics<br>Extended relationships with patients enriched students' clinical experience<br>No difference in academic performance on formative assessments between students undertaking community-based versus hospital-based teaching<br>Reported costs were less than the average <i>SIFT into the Future</i> student-year | Debriefing Sessions – Student Feedback                                       |
| 6.  | Cardiff University                                    | Grant and Robling (2006)   | Year 5: GP attachment                                                                                                                                           | Needs assessment<br>Impact assessment                             | All parties found the attachment to be positive<br>GPs felt more confident clinically through teaching students<br>Primary care team felt team ethic was strengthened                                                                                                                                                                                                                 | Discussion Meetings – Primary Care Team Feedback<br>Interviews – GP Feedback |
| 7.  | Dundee (University of)                                | Muir (2007)                | Year 1-3: Patient Follow-up in the community                                                                                                                    | Impact Assessment                                                 | Students were able to gain a better insight into patient-centred medicine as a result of the attachment<br>Early exposure to patients evoked student enthusiasm                                                                                                                                                                                                                       | Focus Group – Student Interview                                              |
| 8.  | Glasgow (University of)                               | Davison et al. (1999)      | Year 1: Educational exercise of three teaching sessions                                                                                                         | Needs Assessment                                                  | Students found that learning objectives were met through community-themed educational exercises                                                                                                                                                                                                                                                                                       | Questionnaire – Student Evaluation                                           |
| 9.  | Glasgow (University of)                               | Mullen et al. (2010)       | Year 1: Patient interviews in the community                                                                                                                     | Impact Assessment                                                 | Integration of community-based exercise positively influenced students' attitudes in regards to:<br>-understanding of psycho-social model of illness<br>-development of empathy                                                                                                                                                                                                       | Questionnaire – Student Evaluation                                           |
| 10. | Imperial College                                      | Powell and Easton (2012)   | Year 3: 3-session surgical module conducted by GP teachers                                                                                                      | Implementation Assessment                                         | Surgical teaching delivered by GPs was favourable based on the following benefits:<br>- protected time for learning<br>- regular access to suitable patients<br>- learner-centred teaching<br>GPs lacked specialist knowledge, and                                                                                                                                                    | Focus group – Student Interview                                              |



|     |                                                                               |                                  |                                                                |                                                                            |                                                                                                                                                                                                                                                                                                                                                                                                              |                                                                                                                      |
|-----|-------------------------------------------------------------------------------|----------------------------------|----------------------------------------------------------------|----------------------------------------------------------------------------|--------------------------------------------------------------------------------------------------------------------------------------------------------------------------------------------------------------------------------------------------------------------------------------------------------------------------------------------------------------------------------------------------------------|----------------------------------------------------------------------------------------------------------------------|
|     |                                                                               |                                  |                                                                |                                                                            | teaching was not directed by syllabus                                                                                                                                                                                                                                                                                                                                                                        |                                                                                                                      |
| 11. | King's College London                                                         | Seabrook et al. (1999)           | Year 1: Healthcare Team Module<br>Year 2: Special Study Module | Implementation Assessment<br><br>Impact Assessment                         | Community-based courses are feasible and well-received by students<br>Multi-disciplinary teamwork is encouraged positively                                                                                                                                                                                                                                                                                   | Questionnaires – Student feedback<br>Small-group discussions – Student feedback<br><br>Focus groups – Tutor Feedback |
| 12. | King's College London                                                         | Gavin et al. (2002)              | Year 2 – Community-based Special Study Module                  | Impact Assessment                                                          | Student appreciation of:<br>- psychosocial needs of patients<br>- inter-professional teamwork                                                                                                                                                                                                                                                                                                                | Questionnaire survey: students and teaching professionals                                                            |
| 13. | Leeds (University of)                                                         | Thistlethwaite and Jordan (1999) | Year 3: GP-led days in community setting                       | Impact Assessment                                                          | Early community exposure to patient-centred consultations allowed students to:<br>-Appreciate importance of patient-centred communication<br>-Gain more confidence in their abilities<br>Direct observation and feedback from clinician was beneficial to student learning                                                                                                                                   | Focus Groups – Student Interviews                                                                                    |
| 14. | Leeds (University of)                                                         | Thistlethwaite (2000)            | Year 3: GP-led days in community setting                       | Implementation Assessment<br><br>Impact Assessment                         | Positive feedback from students:<br>-community environment allowed ease of patient-centre approach<br>-students now routinely ask about patient concerns<br>Positive feedback from GPs:<br>-teaching was motivating and gratifying                                                                                                                                                                           | Questionnaire – Student Feedback                                                                                     |
| 15. | Leeds (University of), Sheffield (University of) and Hull York Medical School | Macallan and Pearson (2013)      | Year 3-4: GP attachment                                        | Implementation Assessment                                                  | GP enthusiasm and engagement crucial to determining the quality of the placement<br>Well-organized GP practices were valued by students<br><br>Students felt that GPs needed to be better informed of placement outcomes                                                                                                                                                                                     | Focus Groups – Student Interviews                                                                                    |
| 16. | Leicester (University of)                                                     | Lennox and Petersen (1998)       | Year 3: Patient Study                                          | Needs Assessment<br><br>Implementation Assessment<br><br>Impact assessment | Pre-course Needs Assessment of CBE programme based on students' opinions of:<br>- Structure of course<br>- Method of implementation<br>- Assessment format<br>End-course impact assessment revealed that:<br>Course effectively achieves GMC recommendations for "Tomorrow's Doctors"<br>End-Course Implementation assessment revealed that:<br>Continuation of the course was supported by all participants | Questionnaire – Student, Patient and Agency Feedback                                                                 |

|     |                                                   |                           |                                                                      |                                                |                                                                                                                                                                                                                                                                                                                                                    |                                                                                         |
|-----|---------------------------------------------------|---------------------------|----------------------------------------------------------------------|------------------------------------------------|----------------------------------------------------------------------------------------------------------------------------------------------------------------------------------------------------------------------------------------------------------------------------------------------------------------------------------------------------|-----------------------------------------------------------------------------------------|
|     |                                                   |                           |                                                                      |                                                | (students, patients and agencies)                                                                                                                                                                                                                                                                                                                  |                                                                                         |
| 17. | Leicester (University of)                         | Hastings et al. (2000)    | Year 3 or 4: GP practice-based teaching                              | Implementation assessment                      | Comparison of practice-based & hospital-based teaching with respect to the 'teaching content' and the 'teaching processes revealed students favouring practice-teaching in both respects.                                                                                                                                                          | Questionnaire – Student Feedback                                                        |
| 18. | Leicester (University of)                         | Anderson et al. (2003)    | Year 3: Community placement and Patient study                        | Implementation assessment<br>Impact assessment | Implementation assessment:<br>- Continuation of course was well-supported by students, patients and staff<br>Impact Assessment:<br>- Course effectively achieved students' learning objectives in community education.<br>- Positive patient and staff experience in their involvement in medical education.                                       | Questionnaires – Student and Patient Feedback<br>Focus Groups – Staff Interviews        |
| 19. | Liverpool (University of)                         | Watmough (2012)           | Year 1-4: Community-based teaching<br>Year 5: Community placement    | Implementation Assessment<br>Impact Assessment | Implementation Assessment:<br>- Increased curriculum time on community-based teaching was appreciated in terms of clinical skills practice, and understanding the role of primary care.<br>Impact Assessment:<br>- Reformed course achieved significantly better understanding on the relationship between primary, social care and hospital care. | Questionnaires and Interviews – Student Feedback                                        |
| 20. | Liverpool (University of)                         | Watmough et al. (2012)    | Year 1-4: Community-based teaching<br>Year 5: Community placement    | Impact Assessment                              | Impact Assessment:<br>- Graduates from reformed curriculum had more confidence in clinical skills & communication skills, but felt less well prepared with their medical knowledge.                                                                                                                                                                | Questionnaires – Student Feedback                                                       |
| 21. | Manchester (University of)                        | Jones et al. (2002)       | Year 3-4: GP teaching in core modules<br>Year 5: Community placement | Impact Assessment                              | Overall positive impact on students' perception of preparedness in competencies and skills for entering professional practice. This includes a significantly improved understanding of the role of primary care.<br>Students also had no disadvantage to graduates of traditional programme in terms of basic science and clinical knowledge.      | Questionnaires – Student and Supervisor Feedback                                        |
| 22. | Newcastle University Medical School               | Stacy and Spencer (1999)  | Year 2: Patient study projects                                       | Impact Assessment                              | Patients have a positive perception of their role in community-based teaching. They also feel that they benefited from participation.                                                                                                                                                                                                              | Interviews                                                                              |
| 23. | Royal Free and University College Medical Schools | Walters et al. (2003)     | Year 4: Community education integrated in the psychiatry attachment  | Impact Assessment                              | Impact of participation in teaching on patients:<br>- Mainly positive experience (more balanced doctor-patient relationship, and some had therapeutic benefit)<br>- However a few patients found the teaching encounter distressing                                                                                                                | Questionnaire – Patient Survey<br>Interviews - Patients, Students and GP tutor Feedback |
| 24. | Royal Free and University College Medical Schools | Jones et al. (2005)       | Intercalated BSc in Primary Health Care                              | Impact Assessment                              | Students saw benefit in:<br>- development of critical approach and skills relevant to medicine<br>- adding depth to views on GP and primary care                                                                                                                                                                                                   | Interviews – Student Feedback                                                           |
| 25. | Sheffield (University of)                         | Howe and Ives (2001)      | Year 4: GP placement                                                 | Impact Assessment                              | Increased exposure to primary and community care alters career intention, and enhances the view of the role of primary care.                                                                                                                                                                                                                       | Questionnaires – Student Feedback                                                       |
| 26. | Sheffield (University of)                         | Howe (2001)               | Year 4: GP placement                                                 | Needs Assessment                               | Students value community-based learning which have the qualities of:<br>- person-centred clinical methods and learning contexts<br>- positive attitude and committed GP tutors and primary care teams                                                                                                                                              | Questionnaire – Student feedback                                                        |
| 27. | University College London                         | Coleman and Murray (2002) | GP placement                                                         | Impact Assessment                              | Patients mainly felt positive about participating in community-based teaching.<br>However there were also negative                                                                                                                                                                                                                                 | Interviews – Students and GP tutor Feedback                                             |

|     |                           |                          |                                                         |                                                |                                                                                                                                                                                                                                                                                                                                                                                                                     |                                                                  |
|-----|---------------------------|--------------------------|---------------------------------------------------------|------------------------------------------------|---------------------------------------------------------------------------------------------------------------------------------------------------------------------------------------------------------------------------------------------------------------------------------------------------------------------------------------------------------------------------------------------------------------------|------------------------------------------------------------------|
|     |                           |                          |                                                         |                                                | aspects that may concern patients. There may also be shifts in the doctor-patient relationship.                                                                                                                                                                                                                                                                                                                     |                                                                  |
| 28. | University College London | Murray et al. (2001)     | GP placement as part of the internal medicine clerkship | Implementation Assessment                      | -Time spent on teaching and learning activities were similar in both settings<br>- Supervised interaction with patients (which was experienced mainly with the GP) is perceived by students as the most educationally valuable and enjoyable activity<br>- Patient-based learning was highly valued                                                                                                                 | Student Log Diary                                                |
| 29. | University College London | O'Sullivan et al. (2000) | Year 3: Community Medicine placement                    | Implementation Assessment<br>Impact Assessment | Implementation Assessment<br>- basic clinical skills could be learnt in both settings, but GP was better for learning of communication skills & psychosocial issues<br>- GP teaching was advantageous in terms of: quality of teaching, tutors' teaching attitude, teaching methods, course organisation.<br><br>Impact Assessment revealed that:<br>- GP enabled students to increase in confidence and competence | Interviews – Student Feedback<br>Focus Groups – Student Feedback |

1  
2  
3  
4  
5  
6  
7 **Community based teaching in UK medical schools: Current provision and a**  
8  
9 **systematic review of studies evaluating their outcomes.**  
10

11  
12 **The current provision of community-based teaching in UK medical schools:**  
13 **an online survey and systematic review**  
14

15  
16  
17 Sandra WW Lee<sup>1</sup>, Naomi Clement (BMedSci)<sup>1</sup>, Natalie Tang (BMedSci)<sup>1</sup>, William Atiomo (DM FRCOG)<sup>2</sup>  
18

19  
20 <sup>1</sup>School of Medicine, University of Nottingham, Queen's Medical Centre, NG7 2UH, United Kingdom.  
21

22 <sup>2</sup>Clinical Sub-Dean, School of Medicine, University of Nottingham, NG7 2UH United Kingdom.  
23

24 *The lead author affirms that this manuscript is an honest, accurate, and transparent account of the study being*  
25 *reported; that no important aspects of the study have been omitted; and that any discrepancies from the study*  
26 *as planned (and, if relevant, registered) have been explained*  
27

28  
29  
30 Correspondence to:

31 Naomi Clement

32 Email: [msxnc@nottingham.ac.uk](mailto:msxnc@nottingham.ac.uk)

33 Telephone: 0115 978 5800

34 Fax: 0115 8230759

35 For extra data please contact the above  
36

37  
38 *The Corresponding Author has the right to grant on behalf of all authors and does grant on behalf of all*  
39 *authors, a worldwide licence to the Publishers and its licensees in perpetuity, in all forms, formats and media*  
40 *(whether known now or created in the future), to i) publish, reproduce, distribute, display and store the*  
41 *Contribution, ii) translate the Contribution into other languages, create adaptations, reprints, include within*  
42 *collections and create summaries, extracts and/or, abstracts of the Contribution, iii) create any other derivative*  
43 *work(s) based on the Contribution, iv) to exploit all subsidiary rights in the Contribution, v) the inclusion of*  
44 *electronic links from the Contribution to third party material where-ever it may be located; and, vi) licence any*  
45 *third party to do any or all of the above.*  
46  
47  
48  
49  
50  
51  
52  
53  
54  
55  
56  
57  
58  
59  
60

1  
2  
3  
4  
5  
6  
7  
8  
9  
10  
11 **Community based teaching in UK medical schools: Current provision and a**  
12 **systematic review of studies evaluating their outcomes.**  
13 **The current provision of community-based teaching in UK medical schools:**  
14 **an online survey and systematic review**  
15

16 Authors: Sandra WW Lee, Naomi Clement (BMedSci), Natalie Tang (BMedSci), William Atiomo (DM FRCOG)

17  
18 **Abstract:**

19 **Objective**

20 To evaluate the current provision and outcome of ~~community-based~~community-based education (CBE) in UK  
21 medical schools.

22 **Design & Data Sources**

23 An online survey of UK medical school websites and course prospectuses and a systematic review of articles  
24 from PubMed and Web of Science were conducted. Articles in the systematic review were assessed using  
25 Rossi, Lipsey and Freeman's approach to programme evaluation.

26  
27 **Study Selection**

28 Publications from November 1998 to 2013 containing information related to community teaching in  
29 undergraduate medical courses were included.

30 **Results**

31 Out of the 32 undergraduate UK medical schools, one was excluded due to the lack of course specifications  
32 available online. Analysis of the remaining 31 medical schools showed that a variety of CBE models are utilised  
33 in medical schools across the UK. 28 medical schools (90.3%) provide CBE in some form by the end of the first  
34 year of undergraduate training, and 29 medical schools (93.5%) by the end of the second year.

35 From the 1378 references identified, 29 papers met the inclusion criteria for assessment. It was found that CBE  
36 mostly provided advantages to students as well as other participants, including GP tutors and patients.  
37 However, there were a few concerns regarding the lack of GP tutor-s' knowledge in specialty areas, the  
38 negative impact that CBE may have on the delivery of health service in education settings and the cost of CBE.

39 **Conclusions**

40 Despite the wide variations in implementation, community teaching was found to be mostly beneficial. To  
41 ensure the relevance of CBE for "Tomorrow's Doctors", a national framework should be established, and  
42 solutions sought to reduce the impact of the challenges within CBE.  
43  
44  
45  
46  
47  
48  
49  
50  
51  
52  
53  
54  
55  
56  
57  
58  
59  
60

1  
2  
3  
4  
5  
6  
7  
8  
9  
10  
11  
12  
13  
14  
15  
16  
17  
18  
19  
20  
21  
22  
23  
24  
25  
26  
27  
28  
29  
30  
31  
32  
33  
34  
35  
36  
37  
38  
39  
40  
41  
42  
43  
44  
45  
46  
47  
48  
49  
50  
51  
52  
53  
54  
55  
56  
57  
58  
59  
60

**Strengths and Limitations of this Study**

- This is the first study to review how community-based education is currently provided throughout Medical Schools in the UK. The use of Rossi, Lipsey and Freeman’s method of programme evaluation means that the literature was analysed in a consistent and comprehensive way. However, a weakness is that data from the online survey was obtained from online medical school prospectuses. This means the data may be incomplete or out of date. Data in the literature review may also be skewed by publication bias. This is the first study to review how community based community-based education is currently provided throughout Medical Schools in the UK
- ~~However, a weakness is that this information was obtained online from medical schools online prospectuses. This means the data may be incomplete or out of date~~
- ~~The use of Rossi, Lipsey and Freeman’s method of programme evaluation means that the literature was analysed in a consistent and comprehensive way~~

**Formatted:** Font: 10 pt, Not Italic, Font color: Auto

**Formatted:** Line spacing: single

**Formatted:** Font color: Auto

**Formatted:** Left, Line spacing: single

For peer review only

~~Community-based teaching in UK medical schools: Current provision and a  
systematic review of studies evaluating their outcomes~~

The current provision of community-based teaching in UK medical schools:  
an online survey and systematic review

Formatted: Space After: 0 pt, Line spacing: single

## Introduction

The context of healthcare in the UK is changing, with an increasingly aging population and a growing focus on the prevention and management of disease.<sup>1</sup> This has prompted the need to ensure that medical graduates are adequately prepared to address these evolving health care needs, rather than maintaining a reactive approach to illness in the UK. These needs include the prevention and management of chronic health conditions such as diabetes, heart disease, cancer and other long-term illnesses. The promotion of health as well as the delivery of care of conditions like these often occurs within the community, outside the context of University teaching hospitals - provided by professionals from several ~~disciples~~disciplines, including a significant input from social services. In the recently published UK government's white paper, *Equity and Excellence: Liberating the NHS*,<sup>2</sup> a need for a healthcare system focused on personalised care reflecting individuals' health and care needs was outlined. This would involve supporting carers and encouraging multidisciplinary care. These social demographic and political drivers require strong input from multi-professional healthcare providers in primary care and the recruitment of more General Practitioners (GPs) in order to fulfil the growing need for community-based care.

This concept also resonates globally and is considered important by health regulatory bodies that licence medical schools. In 1987, the World Health Organisation (WHO) recommended the reform of health professional curricula by incorporating methods to prepare students for providing care at

1  
2  
3  
4  
5  
6  
7 all levels of health care settings,<sup>3</sup> which can be achieved by, among other things, aligning education  
8 with community needs. The UK General Medical Council's (GMC's) document "*Tomorrow's Doctors*"  
9 recommend that clinical placements should reflect the changing patterns of healthcare and that they  
10 must provide experience in a variety of environments including hospitals, general practices and  
11 community medical services.<sup>4</sup>

12  
13  
14  
15  
16  
17 Curricula in the UK medical schools, therefore, currently offer ~~community-based~~community-based  
18 education (CBE) in various forms and models of teaching.<sup>5</sup> CBE is defined as a medical education  
19 programme that may employ any variety of teaching methods to promote an understanding of  
20 health concerns at a community level. The programme is set within the community, and involves  
21 individuals within the community.

22  
23  
24  
25  
26  
27 Previous publications have evaluated these models of medical teaching in the community, including  
28 ~~an~~ analysis of their advantages and drawbacks.<sup>6-28</sup> However, a thorough literature search (as  
29 conducted in November 2013) found no existing systematic reviews on community-based teaching  
30 across all existing UK medical schools. It remains unclear what the extent of ~~community~~  
31 ~~based~~community-based teaching in UK medical schools is, the impact this had made to the  
32 standards of healthcare, and how the effectiveness of community-based teaching programmes has  
33 been measured. Knowledge of this is considered important, as it would guide the structuring of  
34 undergraduate medical curricula to adapt to changing contexts in the UK, hence effectively  
35 developing a future generation of doctors who are appropriately prepared for upcoming health care  
36 needs. The aim of this study, therefore, was to conduct an online survey of the current provision of  
37 ~~community-based~~community-based teaching within UK undergraduate medical schools to  
38 appreciate the extent of implementation. ~~A systematic review was also conducted to evaluate the~~  
39 ~~outcomes of community based teaching in UK medical curricula. A systemic review was also~~  
40 ~~conducted to comprehensively evaluate community-based teaching in UK medical curricula on the~~  
41 ~~domains of programme needs, implementation, impact, and cost.~~



## Methods

### *Online Survey*

An online survey of the current provision of community-based teaching in UK ~~m~~Medical ~~c~~Curricula was completed by NC through accessing official online material of medical schools between 31st November 2013 and 8th December 2013. An up-to-date list of all the registered medical schools was obtained from the Medical Schools Council (MSC) website on 31st November 2013.<sup>29</sup> All graduate-entry courses were excluded. This was due to the wide variations of graduate-entry course structure, as well as the lack of literature on post-graduate ~~community-based~~community-based medical education. This was a prerequisite in order for the results of both the online survey and systematic review to be evaluated in parallel.

Online material of the undergraduate medical curriculum was sourced using the Google search engine, and included content from university websites or online course prospectuses for the 2014 intake. The information search was specific to descriptions of both mandatory and elective components of the curriculum relating to “primary care”, “general practice”, or “community medicine”.

### *Systematic Review: Data Sources*

A systematic literature review was conducted using the electronic databases PubMed and Web of Science to source for papers published on undergraduate community-based medical education. With the understanding that community-based education has evolved over the years, only publications published within the last 15 years, from November 1998 to 2013, were included in this study, from 1998 to November 2013. The search criteria was (“community-based”, “community-oriented”,

1  
2  
3  
4  
5  
6  
7 “community involvement”, or “primary health care”) and (“medical curriculum”, “medical students”,  
8  
9 “undergraduate medical education” or “undergraduate medical school”).

### 10 11 *Systematic Review: Selection criteria & Data Extraction*

12  
13  
14 The relevance of the articles was screened by the title and abstract, based on the inclusion and  
15  
16 exclusion criteria. Articles were selected if they described undergraduate medical education within  
17  
18 the UK. Papers that included healthcare professionals apart from medical students were excluded.  
19  
20 Any articles that were duplicated, not available in full text, or not published in English were also  
21  
22 regarded as unsuitable for the review. In total, 29 peer-reviewed articles were identified as relevant,  
23  
24 and were selected for further qualitative content analysis by SL and NT (see figure 1). Data on the  
25  
26 following were extracted from each article: (1) Format of CBE; (2) Type of evaluation used to assess  
27  
28 the programme; (3) Findings of this evaluation; and (4) Method of data collection. Rossi, Lipsey and  
29  
30 Freeman’s (2004) approach to programme evaluation was adopted to systematically categorise the  
31  
32 evaluation findings on CBE (see Table 1). ~~based on impact of CBE on students, patients and other~~  
33  
34 ~~participants as well as cost and implementation of CBE. The domains applicable to this study were~~  
35  
36 ~~the needs assessment, implementation assessment, impact assessment, and cost assessment. The~~  
37  
38 ~~impact assessment was further sub-categorised into the impact on students (target population of~~  
39  
40 ~~CBE), and the impact on others involved in CBE programmes.~~  
41  
42 ~~Abstraction of data was performed independently by reviewers SL and NT. Themes were also~~  
43  
44 ~~independently drawn from data analysis of the impact assessments on students. Disagreements~~  
45  
46 ~~between the two reviewers were resolved by arriving at a consensus.~~

### 47 48 49 **Results**

1  
2  
3  
4  
5  
6  
7 Current provision of ~~community-based~~community-based teaching in UK medical  
8  
9 schools-

10  
11  
12 We were able to obtain information from the medical school websites about the provision of  
13  
14 ~~community-based~~community-based teaching in all 32 undergraduate medical schools, and this is  
15  
16 outlined in Table 2 and summarised in Table 3.

17  
18 All undergraduate medical schools provided some form of community-based teaching or placement.

19  
20 There was, however, variation in the structure, duration and time in the course when community  
21  
22 teaching was delivered (see Table 2 and Table 3). ~~Community-based education~~CBE mainly took the  
23  
24 form of clinical placements, patient studies, and optional modules. The duration of ~~community~~  
25  
26 ~~based~~community-based teaching or placements varied from half day visits to various community  
27  
28 settings (as undertaken in schools such as Hull York, Newcastle, Nottingham and St George's) to a  
29  
30 year-long module on primary care and population medicine (as undertaken in Brighton & Sussex).

31  
32 Analysis of the varying formats of CBE (with the exclusion of Norwich, due to the lack of year-by-year  
33  
34 curriculum details) revealed that most medical schools (a total of 31)~~(a total of 31)~~ provided early  
35  
36 exposure to general practice or community teaching. 28 medical schools (90.3%) provide community  
37  
38 teaching from the first year of undergraduate medical education. By the end of the second year of  
39  
40 pre-clinical education, students of 29 medical schools (93.5%) would have received some form of  
41  
42 community-based ~~education~~teaching.

43  
44 The most popular form of ~~community-based~~community-based teaching within medical schools was  
45  
46 GP placements with 83.9% (26 schools from a total of 31) providing GP placements within the first  
47  
48 two years of study. Patient studies were the least common form of placements. These were defined  
49  
50 as projects where students visited patients within the community or at home. Only 38.7% (12  
51  
52 schools) ~~of~~ provided this format of community education at some point in their courses.

1  
2  
3  
4  
5  
6  
7 Fourteen (45.2%) medical schools provided regular exposure to community teaching in every year or  
8 phase of the course.

9  
10  
11 With regards to ~~When it comes to optional modules being~~ offered to students, ~~however, only three~~  
12 of the medical schools offered them – 9.7%. This implies that, if students are particularly interested  
13 in community care, they may find it difficult to achieve extra studies in this area.

14  
15  
16  
17  
18  
19  
20 ~~Fourteen (45.2%) medical schools provided regular exposure to community teaching in every year or~~  
21 ~~phase of the course.~~

22  
23  
24  
25 *Literature review of studies evaluating ~~outcomes of community~~*  
26 *~~based~~ community-based teaching*

27  
28  
29  
30 A summary of the studies evaluated in the systematic literature review are outlined in Table 4. The  
31 main methods of evaluation employed in the studies were questionnaires, interviews, and focus  
32 groups of the key stakeholders in CBE - students, patients, tutors and other staff in the community  
33 setting.  
34  
35  
36

### 37 *Needs Assessment of CBE*

38  
39  
40 Studies of student expectations of CBE highlighted that students valued experiential patient-centred  
41 learning and tutor supervision in the community setting.<sup>14, 30</sup> In a Sheffield study,<sup>14</sup> students also  
42 recognised that CBE was a powerful vehicle for changing their approach to medicine and illness,  
43 where the patient as a person is given emphasis over the disease.  
44  
45  
46  
47

### 48 *Implementation Assessment of CBE*

49  
50  
51 All forms of community-based teaching were generally well-received by medical students, patients,  
52 and participating health care professionals, supporting the continuation of existing community-  
53  
54  
55

1  
2  
3  
4  
5  
6  
7 based teaching programmes in the future. This included community-based teaching which was  
8 incorporated into specialty modules such as: Obstetrics and Gynaecology<sup>31</sup>, Psychiatry<sup>22</sup> and  
9 Surgery<sup>27</sup>. The unique approach of incorporating primary healthcare in an intercalated Bachelor of  
10 Science medical research year also received positive feedback<sup>23</sup>.

11  
12  
13  
14 Three studies found that students preferred the implementation of practice-based teaching over  
15 hospital-based teaching. Hastings *et al.* found that students in Leicester preferred practice-based  
16 teaching on the grounds of both teaching method and content.<sup>11</sup> O'Sullivan *et al.* had similar findings  
17 among students from University College London, where practice-based teaching bore qualities of  
18 better teaching attitudes, teaching methods, and course organisation.<sup>12</sup> Interestingly, these findings  
19 were consistent with Powell and Easton's investigation on Imperial College students undertaking  
20 their surgery module.<sup>27</sup> These students preferred surgical teaching within general practices due to  
21 there being learner-centred approach in teaching, more protected teaching time, and regular access  
22 to suitable patients for acquiring clinical skills.

23  
24  
25  
26  
27  
28  
29  
30  
31  
32 The success of community teaching in Leicester was analysed by Hastings *et al.*<sup>11</sup> It was found that  
33 the improved quality of teaching by GP tutors was attributed to a higher proportion of GP tutors  
34 attending teacher-training courses. General practices were also found to have greater resource  
35 availability and NHS funding specifically allocated to support the teaching of in support of teaching  
36 medical undergraduates. All these factors placed hospital doctors at a disadvantage in preparing  
37 good-quality clinical teaching sessions in comparison to General Practitioners.

### 38 39 40 41 42 43 44 *Impact Assessment of CBE*

45  
46  
47 Studies of CBE impact on students bore the following themes: (1) Learning Outcomes, (2) Behavioural  
48 Changes to Primary Care, and (3) Traits of Future Doctors. These are summarised in Figure 2.

49  
50  
51 CBE also had an impact on participating doctors, staff, patients and medical schools. A summary of  
52 this is shown in Figure 3.

53  
54  
55  
56  
57  
58  
59  
60  
Formatted: Font: 11 pt, Not Italic, Font color: Black

### *Impact on Students: Learning Outcomes*

~~The impact of CBE on student's is summarised in Figure 2.~~

Implementation of CBE in medical schools had a significant positive impact on medical students' learning outcomes. The following results provide evidence ~~to of~~ the strong educational value among students: ~~11—Eleven~~ studies showed that medical student's gained insight into patient-~~centred~~ ~~centered~~ medicine and continuity of care, which were learning outcomes that students viewed as important in their education.<sup>10, 13, 17, 19-21, 23, 25-26, 28, 32</sup> This was measured quantitatively through questionnaires that were administered to students, supplemented by quantitative feedback gathered from focus groups and interviews.

~~Students' An~~ appreciation and understanding of the role of primary care was ~~a theme that was common to found in~~ four studies.<sup>20-21, 28, 32</sup> This was revealed through questionnaires, where students rated the extent of their understanding of primary care and its relationship with other levels of care. Two studies reported the benefit of community placements in broadening the student's awareness of teamwork in multi-disciplinary teams.<sup>19, 30</sup> Another study reported the positive finding of successfully exposing students to a broad and varied range of clinical problems in a community setting.<sup>33</sup>

In comparison to hospital-based teaching, improved confidence in clinical skills and competencies was found to be a favourable outcome of CBE in four studies.<sup>10, 12, 19, 20</sup> This finding was derived from questionnaires and focus group interviews from students who had experienced CBE.

Two studies found no difference in academic performance between students under CBE and 'traditional' hospital-based teaching.<sup>17, 20</sup> One study of students who undertook a specialty placement in Obstetrics and Gynaecology also found that there was no difference in clinical performance as rated by their tutors, and no statistically significant difference in student final clerkship grades.<sup>34</sup>

1  
2  
3  
4  
5  
6  
7 Although most evaluations produced consistent evidence on the benefits of community teaching,  
8 two studies highlighted the lack of in-depth knowledge of specialist teaching when conducted by GP  
9 tutors: the significance of this finding was measured qualitatively through student interviews,<sup>27</sup> and  
10 quantitatively through academic scores for the respective specialty modules.<sup>34</sup>  
11

### 12 13 14 *Impact on Students: Behavioural Changes to Primary Care*

15  
16  
17 Two studies found that the implementation of CBE resulted in a reversal of negative attitudes  
18 towards primary care, and an increase of interest in General Practice as a career option among  
19 students.<sup>23, 32</sup>  
20  
21  
22

### 23 24 *Impact on Students: Traits of Future Doctors*

25  
26  
27 Studies also showed that medical graduates from curricula with increased emphasis on community-  
28 based teaching were at no disadvantage to graduates from the traditional hospital-based teaching.  
29  
30<sup>17, 33</sup> Academically, graduates from a community-based curriculum performed as well as their  
31 counterparts on their final formative assessments. Moreover, graduates from curricula where  
32 community-based teaching had been offered had the advantage of increased confidence in  
33 communication skills and clinical skill competencies. This outcome of CBE was evaluated in three  
34 studies.<sup>17, 20, 28</sup> Two of these three studies additionally reported that graduates felt less confident in  
35 their medical knowledge on disease processes.<sup>20, 28</sup> However, there was no evident difference found  
36 in comparison to graduates of 'traditional' programmes of old medical curricula which had no CBE  
37 component when measured by academic results and feedback from educational supervisors.<sup>20,28</sup>  
38  
39  
40  
41  
42  
43  
44

### 45 46 *Impact on Others Involved in CBE Programme*

47  
48  
49 ~~Other than student outcomes, CBE also had an impact on participating doctors, staff, patients and~~  
50 ~~medical schools. This is summarised in Figure 3.~~  
51  
52  
53  
54  
55

1  
2  
3  
4  
5  
6  
7 In three studies, it was found that GP tutors and participating staff had both role satisfaction and  
8 development of professional and personal ethics <sup>7, 13, 24</sup> Grant and Robling also found strengthened  
9 team ethics between members of the primary health care team.<sup>24</sup>  
10

11  
12  
13 Doctors and staff, however, were found to have organisational issues in juggling community\_-  
14 teaching with practice commitments. The expense of one over the other was described in CBE  
15 implemented by the University of Birmingham.<sup>7</sup> The unfavourable outcome of blurred boundaries in  
16 the doctor-patient relationship was also reported as a concern in two studies.<sup>18, 22</sup>  
17  
18  
19

20  
21 Five studies evaluated the positive patient outcomes of CBE: Four of these studies reported the  
22 beneficial sense of empowerment that patients gained from participating in community teaching.<sup>9,</sup>  
23 <sup>21-22, 24</sup> The remaining study reported that patients developed feelings of altruism from helping  
24 medical students in their education.<sup>18</sup>  
25  
26  
27

28  
29 Apart from gaining a sense of empowerment, Walters *et al.* also reported the development of a  
30 more balanced doctor-patient relationship, and a therapeutic benefit for the patients as a result of  
31 talking to students about their medical condition.<sup>22</sup>  
32  
33  
34

35  
36 Among these five studies on patient outcomes, two studies included further evaluations on the  
37 negative impact that resulted from patient participation. The negative outcomes comprised\_-of  
38 reinforced feelings of ill-health which may be distressing or anxiety-provoking, and concerns of  
39 breaching patient confidentiality.<sup>18, 22</sup>  
40  
41  
42

43  
44 Powel *et al.*'s evaluation also shed light on the benefits that medical schools gained from tapping  
45 into teaching within the community. By doing so, medical schools were able to increase the  
46 availability of learning opportunities to medical students.<sup>27</sup>  
47  
48

49  
50 Two studies raised the possibility of the negative impact that CBE would have on hospital tutors.<sup>7, 13</sup>

51  
52 The concern raised in these studies was with regards to a shift of focus away from teaching  
53  
54  
55  
56  
57  
58  
59  
60



1  
2  
3  
4  
5  
6  
7 conducted by hospital-based tutors, and towards an emphasis on ~~community-based education~~  
8 teaching in the community.

### 11 *Cost Assessment of CBE*

14 Only one study evaluated the costs of running a community-based course. An evaluation of ~~a~~-CBE in  
15 Cambridge revealed that the programme was cost-feasible assince the total expenditure on one  
16 student-year of community-based teaching was within the cost estimates of Service Increment for  
17 Teaching (SIFT) funding.<sup>17</sup> The study also noted that the balance between placement costs and  
18 facilities costs stood at a ratio of approximately 2:1, which is a reverse of the traditionally allocated  
19 1:4 ratio in SIFT funds. This finding implied that the traditional allocations for SIFT funds would be  
20 inappropriate when applied to community-based teaching.

### 29 **Discussion**

31 This study was conducted to analyse the current provision of community-based education across  
32 undergraduate medical schools in the UK. All medical schools were found to offer some ~~community~~  
33 ~~based~~community-based teaching in their curricula, which falls in line with the recommendations of  
34 the WHO and the GMC as well as following which also follows the social demographic and political  
35 changes within the UK. Furthermore, a significant proportion of medical schools offered community-  
36 based teaching early in the medical course. The benefits of this early exposure is explored by Dornan  
37 et al., where the opportunity to learn in context of clinical settings enabled students to develop an  
38 awareness of their interpersonal skills, attitudes and abilities.<sup>35,36</sup>

41  
42  
43  
44  
45  
46  
47 In general, community-based teaching was well-received by medical students due to its good  
48 educational value on many levels of learning outcomes. It also gave students insight into the option  
49 of General Practice as a future career. This is consistent with the direction of travel the UK  
50 healthcare workforce needs to address due to the changing demographics and the emphasis  
51  
52  
53  
54

Formatted: Font: Italic

Formatted: Superscript

1  
2  
3  
4  
5  
6  
7 changing in health care delivery from management to prevention. Not only was community-based  
8  
9 teaching of value to students, but it was also found to produce medical graduates of equal clinical  
10  
11 skills and competencies to their counterparts who were taught under the 'traditional' hospital-based  
12  
13 medical programme.<sup>17,33</sup> This outcome is consistent with findings in Australian medical schools  
14  
15 which showed that students generally did as well as or, in some areas of clinical competencies, even  
16  
17 better than their counterparts who received hospital-based teaching<sup>7</sup>. Community-based teaching  
18  
19 in medicine was also beneficial to medical schools in maximising the sources of available learning  
20  
21 opportunities for medical students.<sup>27</sup> Moreover, community-based teaching in medicine was found  
22  
23 to offer a unique opportunity to foster inter-professional learning – an outcome that is consistent  
24  
25 with the political drivers for better patient care.<sup>35,37</sup>

26  
27 Although it was evident that community-based teaching has a vast array of benefits, several  
28  
29 drawbacks were identified and underscored as challenges to the implementation of CBE. Studies  
30  
31 reflected the challenges of general practice tutors lacking adequate knowledge in specialty areas,<sup>27</sup>  
32  
33 and community teaching having a negative impact on the delivery of health service in some general  
34  
35 practices.<sup>7</sup> Murray and Modell discuss possible solutions to these issues, such as the development of  
36  
37 university-linked practices that would scrutinise the effectiveness of teaching.<sup>38</sup> It is imperative that  
38  
39 these solutions are explored and tested in current CBE programmes so that the impact of  
40  
41 programme drawbacks may be reduced. This would be the way-forward to strengthening the  
42  
43 implementation of CBE in medical curricula.

44  
45 An assortment of models were seen to be used for community-based teaching in the UK, where  
46  
47 programmes varied in their methods of delivery, durations of exposure and points of undergraduate  
48  
49 education at which the teaching was delivered. This is congruous with guidance from the GMC  
50  
51 publication "Tomorrow's Doctors", which states that it was for each medical school to design its own  
52  
53 curriculum to suit its own circumstance. It should be noted that community-based education can

54  
55 encompass a broad term with broadly encompasses varied variation in delivery formats, including

Formatted: Font: +Body (Calibri)

Formatted: Font: +Body (Calibri)

1  
2  
3  
4  
5  
6  
7 both clinical and non-clinical experiences. Unfortunately, the diversification of CBE poses a challenge  
8 for developing a standardised set of criteria for evaluating the outcomes of CBE. Consequently, it  
9 becomes difficult to establish a national framework for quality assurance of medical curricula, and to  
10 make recommendations for improving the implementation of CBE.  
11

12  
13 In order to achieve the expectations laid out for "Tomorrow's Doctors",<sup>4</sup> there is a principal need to  
14 define the competencies that are required to prevent illness and promote health in the primary care  
15 or ~~community-based~~ community-based setting. Ladhani *et al.*, for example, categorised six themes of  
16 community-based education competencies within nursing and medicine: pPublic health; cCultural  
17 diversity; lLeadership and management; cCommunity development and advocacy; rResearch and  
18 evidence-based practice; and gGeneric competencies.<sup>3638</sup> Subsequently, a national framework may  
19 be derived from these key competencies so as to measure the effectiveness of community-based  
20 teaching in achieving these targeted goals.  
21  
22  
23  
24  
25  
26  
27  
28

29 The development of a national framework was explored and suggested by Cotton *et al.*,<sup>3739</sup> where a  
30 list of criteria for quality practice-based teaching in the UK was consensually derived from views of  
31 medical educators and students at a national conference. However, since its development, there has  
32 been no literature found on the use of these criteria to objectively evaluate community-based  
33 education at a local, regional or national level. More work in this area should be encouraged to  
34 achieve a national standard for community-based education in the UK.  
35  
36  
37  
38  
39

40 Little data was found on the cost implications of community-based teaching. Given the wide  
41 variations in the format of CBE programmes conducted across the UK, it is difficult to make general  
42 conclusions about the cost impact of community-based teaching. Nonetheless the findings from  
43 Oswald *et al.*'s study sets a benchmark for other similar community teaching within the UK.<sup>17</sup> Oswald  
44 *et al.* found that the absolute costs per student session of community teaching was within the  
45 budgets of SIFT funding. The cost-feasibility implied in this study is consistent with Murray *et al.*'s  
46 1993 study of the University College London teaching programme,<sup>3840</sup> where community teaching  
47 cost £60 per student session, comparing well with the SIFT provision of £64 per student session.  
48  
49  
50  
51  
52  
53  
54

Formatted: Font: +Body (Calibri)

Formatted: Font: +Body (Calibri)

1  
2  
3  
4  
5  
6  
7 However, Oswald *et al.* discusses that the national formula for SIFT funds is inappropriate for  
8 community teaching due to a mismatch in the 2:1 ratio of placement costs and facilities costs in  
9 community teaching, versus the traditionally allotted 1:4 SIFT ratio between placement costs and  
10 facilities costs. SIFT funding to medical education institutions is traditionally divided to cater for the  
11 costs of clinical placements (about 20%) and the costs of facilities (80%). The 1995 Winyard Report  
12 specified that the use of SIFT funding would support teaching conducted in settings other than the  
13 main university hospital, such as in general practices and community settings.<sup>3941</sup> This report  
14 unfortunately failed to realise the inappropriateness of applying the 1:4 formula (for facilities and  
15 placement costs) in the context of primary care. The allocation of 80% SIFT funding to facilities  
16 would be disadvantageous to community-based teaching since this money will be retained for usage  
17 within the hospital setting. It is important that the provision of SIFT funding is reconsidered so that it  
18 suits a growing emphasis of community-based education in the medical curriculum and therefore  
19 help develop these settings as centres of education.  
20  
21  
22  
23  
24  
25  
26  
27  
28  
29

30  
31 The strengths of our study are that it provides the most up-to-date picture of the UK landscape of  
32 ~~community-based~~ community-based teaching in medical schools and the fact that the literature  
33 review was conducted in a systematic way. The use of Rossi, Lipsey and Freeman's widely accepted  
34 approach to programme evaluation also ensured that programme evaluations in the literature were  
35 analysed comprehensively.  
36  
37  
38  
39

40  
41 ~~The weaknesses of the literature review include that of publication bias. As the majority of the~~  
42 ~~papers included in the review were written from supporters of CBE and there are very few~~  
43 ~~publications on the disadvantages of CBE, perhaps skewing our data.~~ The weaknesses ~~are that~~ of the  
44 online survey ~~are that it~~ relied on data provided on the websites of medical schools which can  
45 occasionally be out of date and ~~not in~~ complete. The online survey also had the disadvantage of  
46 inconsistency in the extent of details provided online. For example, the online sources may not have  
47 mentioned details on clinical placements which are primarily hospital-based, but also provide  
48 supplementary clinical teaching within the community setting, (e.g. shadowing of a community  
49  
50  
51  
52  
53  
54  
55

1  
2  
3  
4  
5  
6  
7 midwife in an Obstetrics & Gynaecology placement). To address these weaknesses, the method of  
8 information collection may be improved by contacting course administrators to obtain detailed and  
9 focused information on any community-based teaching that is offered to students in all the course  
10 modules. The weaknesses of the literature review include that of publication bias. The majority of  
11 the papers included in the review were written in support of CBE, and there are very few  
12 publications which focused on the disadvantages of CBE. This imbalance may have skewed our data  
13 in favour of CBE.  
14  
15  
16  
17  
18  
19  
20  
21

## 22 Conclusion

23  
24  
25 In this study, all undergraduate medical schools in the UK were found seen to be offering some form  
26 of community-based teaching in their medical curriculum. The delivery of CBE varied broadly, but all  
27 forms of community teaching were generally found to be beneficial and was therefore well-received  
28 by students, patients, participating staff, and medical schools. The challenges and cost issues of  
29 community teaching should also not be overlooked, and solutions to address these need to be  
30 explored such that the delivery of CBE may be improved.  
31  
32  
33  
34  
35  
36

37 Under the pressures of social demographics and political drivers to incorporate more community-  
38 based teaching in medical education, there is a need to ensure that CBE is delivered at acceptable  
39 quality standards for it to achieve its anticipated benefits. A national framework would need to be  
40 established to ensure these standards are met. This would then succeed to act as a standardised  
41 national guideline for evaluating the effectiveness of CBE programmes in developing professional  
42 competencies that are expected of "Tomorrow's Doctors".  
43  
44  
45  
46  
47  
48

## 49 Competing Interests

50  
51 We have read and understood BMJ policy on declaration of interests and declare that we have no  
52 competing interests.  
53  
54  
55  
56

## Authors' Contributions

WA came up with the concept of the study, NC performed the Medical School online survey and SL and NT the Literature Review. SL, NC and NT wrote the draft of the manuscript and editing was performed by SL, NC, NT and WA.

## References

<sup>1</sup> *Our Priorities for 2013/14* [Internet]. London: Public Health England; [Updated 26 April 2013, Accessed January 2014]. Available from: <https://www.gov.uk/government/publications/public-health-englands-priorities-for-2013-to-2014>

<sup>2</sup> *Equity and Excellence: Liberating the NHS* [Internet]. London: Department of Health; [Updated July 2010, Accessed January 2014]. Available from: <https://www.gov.uk/government/publications/liberating-the-nhs-white-paper>

<sup>3</sup> *Community-Based Community-based Education of Health Personnel: Report of a WHO Study Group* [Internet]. Geneva: World Health Organisation; [Updated November 1987. Accessed January 2014]. Available from: <http://apps.who.int/iris/handle/10665/41714>

<sup>4</sup> *Tomorrow's Doctors* [Internet]. London: General Medical Council; [Updated 2009, Accessed January 2014]. Available from: [http://www.gmc-uk.org/education/undergraduate/tomorrows\\_doctors\\_2009.asp](http://www.gmc-uk.org/education/undergraduate/tomorrows_doctors_2009.asp)

<sup>5</sup> Major SC, Booton P. Involvement of general practice (family medicine) in undergraduate medical education in the United Kingdom. *J Ambul Care Manage* 2008 September;31(3):269-75.

<sup>6</sup> Davison H, Capewell S, Macnaughton J, Murray S, Hanlon P, McEwen J. Community-oriented medical education in Glasgow: developing a community diagnosis exercise. *Med Educ* 1999 January;33(2):55-62.

<sup>7</sup> Parle J, Greenfield S, Thomas C, Ross N, Lester H, Skelton J, *et al.* Community-based clinical education at the University of Birmingham Medical School. *Acad Med* 1999 March;74(3):248-53.

<sup>8</sup> Seabrook MA, Lempp H, Woodfield SJ. Extending community involvement in the medical curriculum: lessons from a case study. *Med Educ* 1999 November;33(11):838-45.

1  
2  
3  
4  
5  
6  
7<sup>9</sup> Stacy R, Spencer J. Patients as teachers: a qualitative study of patients' views on their role in a  
8 community-based undergraduate project. *Med Educ* 1999 September; 33(9):688-94.  
9

10<sup>10</sup> Thistlethwaite JE, Jordan JJ. Patient-centred consultations: a comparison of student experience  
11 and understanding in two clinical environments. *Med Educ* 1999 September;33(9):678-85.  
12

13<sup>11</sup> Hastings AM, Fraser RC, McKinley RK. Student perceptions of a new integrated course in clinical  
14 methods for medical undergraduates. *Med Educ* 2000 February;34(2):101-7.  
15

16  
17<sup>12</sup> O'Sullivan M, Martin J, Murray E. Students' perceptions of the relative advantages and  
18 disadvantages of community-based and hospital-based teaching: a qualitative study. *Med Educ* 2000  
19 August;34(8):648-55.  
20

21  
22<sup>13</sup> Thistlethwaite JE. Introducing community-based teaching of third year medical students: outcomes  
23 of a pilot project one year later and implications for managing change. *Educ Health* 2000;13(1):53-  
24 62.  
25

26  
27<sup>14</sup> Howe A. Patient-centred medicine through student-centred teaching: a student perspective on the  
28 key impacts of community-based learning in undergraduate medical education. *Med Educ* 2001  
29 July;35(7):666-72.  
30

31  
32<sup>15</sup> Howe A, Ives G. Does community-based experience alter career preference? New evidence from a  
33 prospective longitudinal cohort study of undergraduate medical students. *Med Educ* 2001  
34 April;35(4):391-7.  
35

36  
37<sup>16</sup> Murray E, Alderman P, Coppola W, Grol R, Bouhuijs P, van der Vleuten C. What do students  
38 actually do on an internal medicine clerkship? A log diary study. *Med Educ* 2001  
39 December;35(12):1101-7.  
40

41  
42<sup>17</sup> Oswald N, Alderson T, Jones S. Evaluating primary care as a base for medical education: the report  
43 of the Cambridge Community-based Clinical Course. *Med Educ* 2001 August;35(8):782-8.  
44

45  
46<sup>18</sup> Coleman K, Murray E. Patients' views and feelings on the community-based teaching of  
47 undergraduate medical students: a qualitative study. *Fam Pract* 2002 April;19(2):183-8.  
48

49  
50<sup>19</sup> Gavin J, Lempp H, Elliman A, Grogan C. Teaching in partnership: linking a medical school and a  
51 community trust. *Br J Community Nurs* 2002 January;7(1):32-6.  
52  
53  
54  
55

1  
2  
3  
4  
5  
6  
7  
8  
9  
10  
11  
12  
13  
14  
15  
16  
17  
18  
19  
20  
21  
22  
23  
24  
25  
26  
27  
28  
29  
30  
31  
32  
33  
34  
35  
36  
37  
38  
39  
40  
41  
42  
43  
44  
45  
46  
47  
48  
49  
50  
51  
52  
53  
54  
55  
56  
57  
58  
59  
60

<sup>20</sup> Jones A, McArdle PJ, O'Neill PA. Perceptions of how well graduates are prepared for the role of pre-registration house officer: a comparison of outcomes from a traditional and an integrated PBL curriculum. *Med Educ* 2002 January;36(1):16-25.

<sup>21</sup> Anderson ES, Lennox AI, Petersen SA. Learning from lives: a model for health and social care education in the wider community context. *Med Educ* 2003 January;37(1):59-68.

<sup>22</sup> Walters K, Buszewicz M, Russell J, Humphrey C. Teaching as therapy: cross sectional and qualitative evaluation of patients' experiences of undergraduate psychiatry teaching in the community. *BMJ* 2003 April;326(7392):740.

<sup>23</sup> Jones M, Singh S, Lloyd M. "It isn't just consultants that need a BSc": student experiences of an Intercolated BSc in primary health care. *Med Teach* 2005 March;27(2):164-8.

<sup>24</sup> Grant A, Robling M. Introducing undergraduate medical teaching into general practice: an action research study. *Med Teach* 2006 November;28(7):192-7.

<sup>25</sup> Muir F. Placing the patient at the core of teaching. *Medical Teacher* 2007 March;29(2-3):258-260.

<sup>26</sup> Mullen K, Nicolson M, Cotton P. Improving medical students' attitudes towards the chronic sick: a role for social science research. *BMC Med Educ* 2010 November;10:84.

<sup>27</sup> Powell S, Easton G. Student perceptions of GP teachers' role in community-based undergraduate surgical education: a qualitative study. *JRSM Short Rep* 2012 August;3(8):51.

<sup>28</sup> Watmough S. An evaluation of the impact of an increase in community-based medical undergraduate education in a UK medical school. *Educ Prim Care* 2012 November;23(6):385-90.

<sup>29</sup> UK medical schools A-Z [Internet]. London: Medical Schools Council; [Accessed November 2013]. Available from: <http://www.medschools.ac.uk/Students/UKMedicalSchools/Pages/UK-Medical-Schools-A-Z.aspx>

<sup>30</sup> Lennox A, Petersen S. Development and evaluation of a ~~community-based~~ community-based multiagency course for medical students: descriptive survey. *BMJ* 1998 February;316:596-599.

<sup>31</sup> Nicholson S, Osonnaya C, Carter Yh, Savage W, Hennessy E, Collinson S. Designing a community-based fourth-year obstetrics and gynaecology module: an example of innovative curriculum development. *Med Educ* 2001 April;35(4):398-403.

<sup>32</sup> Sinclair HK, Ritchie LD, Lee AJ. A future career in general practice? A longitudinal study of medical students and pre-registration house officers. *Eur J Gen Pract* 2006 April;12(3):120-7.



<sup>33</sup> Alderson TS, Oswald NT. Clinical experience of medical students in primary care: use of an electronic log in monitoring experience and in guiding education in the Cambridge **Community BasedCommunity-based** Clinical Course. *Med Educ* 1999 June;33(6):429-33.

<sup>34</sup> Frattarelli LC, Kamemoto LE. Obstetrics and gynecology medical student outcomes: Longitudinal multispecialty clerkship versus traditional block rotations. *Am J Obstet Gynecol* 2004 November;191(5):1800-1804.

<sup>35</sup> Dornan T, Bundy C. What can experience add to early medical education? Consensus Survey, *British Medical Journal* 2004; 32:834-840.

<sup>36</sup> Dornan T, Littlewood S, Margolis SA, Scherpbier A, Spencer J, Ypinazar V. How can experience in clinical and community settings contribute to early medical education? A BEME systematic review. *Medical Teacher* 2006;28(1):3-18.

<sup>3537</sup> Hosny S, Kamel MH, El-Wazir Y, Gilbert J. Integrating interprofessional education in community-based learning activities: case study. *Med Teach* 2013;35:S68-73.

<sup>3638</sup> Ladhani Z, Scherpbier AJ, Stevens FC. Competencies for undergraduate community-based education for the health professions--a systematic review. *Med Teach* 2012;34(9):733-43.

<sup>3739</sup> Cotton P, Sharp D, Howe A, Starkey C, Laue B, Hibble A, et al. Developing a set of quality criteria for community-based medical education in the UK. *Educ Prim Care*. 2009 May;20(3):143-51.

<sup>3840</sup> Murray E, Jinks V, Modell M. Community-based medical education: feasibility and cost. *Med Educ* 1995 January;29(1):66-71.

<sup>3941</sup> NHS Executive. SIFT into the Future. Leeds: NHS Executive, 1995 (The Winyard Report).

**Legend of figures and tables.**

Figure 1. Flow chart of search strategy used in systematic review

Figure 2. Key Points: Impact of CBE on Students

**Formatted:** Font color: Auto

**Formatted:** Font: +Body (Calibri), 11 pt, Font color: Auto

**Formatted:** Font: +Body (Calibri), Font color: Auto

**Formatted:** Font: +Body (Calibri), 11 pt, Font color: Auto

**Formatted:** Font color: Auto

**Formatted:** Font: +Body (Calibri), 11 pt, Font color: Auto

**Formatted:** Font: +Body (Calibri), No underline, Font color: Auto

**Formatted:** Font: +Body (Calibri), 11 pt, Font color: Auto

**Formatted:** Font: +Body (Calibri), No underline, Font color: Auto

**Formatted:** Font: +Body (Calibri), 11 pt, Font color: Auto

**Formatted:** Font: +Body (Calibri), No underline, Font color: Auto

**Formatted:** Font: +Body (Calibri), 11 pt, Font color: Auto

**Formatted:** Font: +Body (Calibri), No underline, Font color: Auto

**Formatted:** Font: +Body (Calibri), 11 pt, Font color: Auto

**Formatted:** Font: +Body (Calibri), No underline, Font color: Auto

**Formatted:** Font: +Body (Calibri), Font color: Auto

**Formatted:** No underline, Font color: Auto

**Formatted:** Font color: Auto

**Formatted:** No underline, Font color: Auto

**Formatted:** Font color: Auto

**Formatted:** No underline, Font color: Auto

1  
2  
3  
4  
5  
6  
7  
8  
9  
10  
11  
12  
13  
14  
15  
16  
17  
18  
19  
20  
21  
22  
23  
24  
25  
26  
27  
28  
29  
30  
31  
32  
33  
34  
35  
36  
37  
38  
39  
40  
41  
42  
43  
44  
45  
46  
47  
48  
49  
50  
51  
52  
53  
54  
55  
56  
57  
58  
59  
60

Figure 3. Key Points: Impact of CBE on Other Participants in CBE

Table 1. Domains in Rossi, Lipsey and Freeman's approach to Programme Evaluation

Table 2. ~~Community Based~~Community-based Teaching in Medical Schools in the UK

Table 3. Summary of Findings from Online Survey

Table 4. Summary of Systematic Review

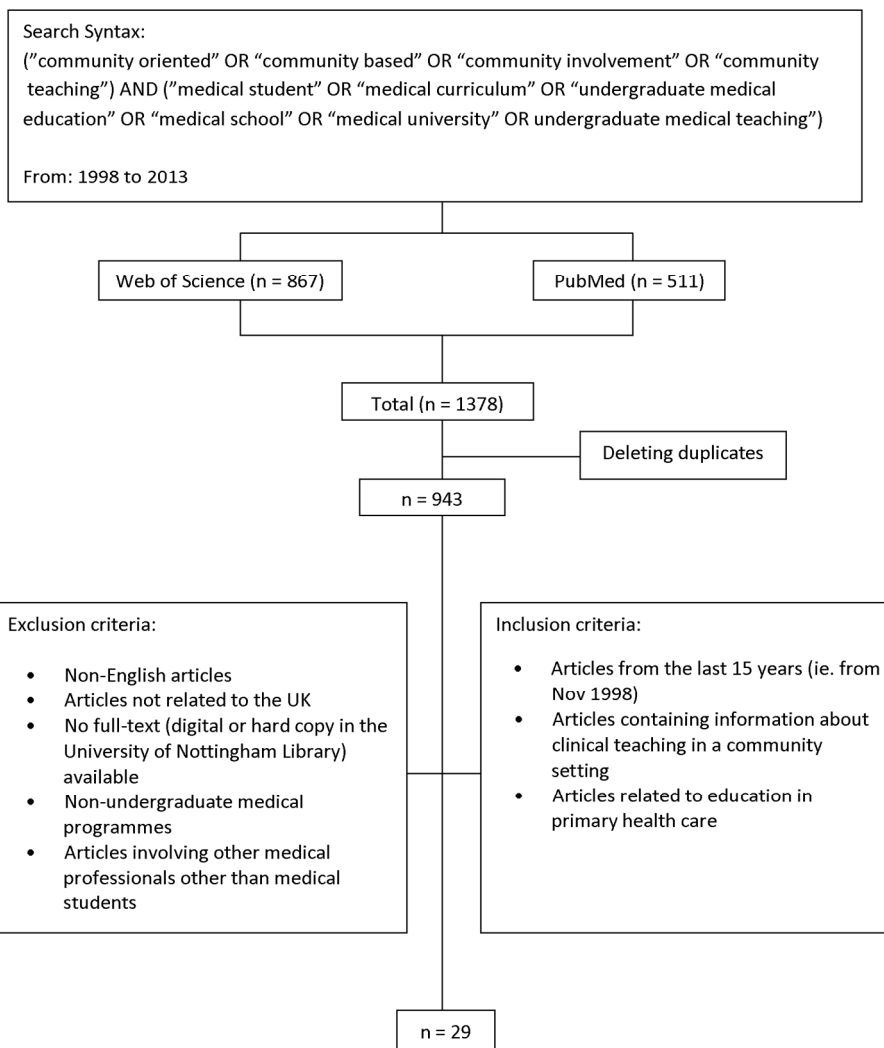

Figure 1 - Flow chart of search strategy used in systematic review  
197x224mm (300 x 300 DPI)

**KEY POINTS: IMPACT OF CBE ON STUDENTS****LEARNING OUTCOMES**

- Insight into patient-centred medicine and continuity of care
- Appreciation of the role of primary care
- Appreciation of multi-disciplinary teams
- Confidence in clinical skills and competencies
- No difference in academic performance (in comparison to hospital-based teaching)
- Teaching on a broad range of common illnesses

**BEHAVIOURAL CHANGE**

- Gained interest in GP as a career

**TRAITS OF FUTURE DOCTORS**

- No difference in professional performance as doctors
- Graduates from CBE had increased confidence in clinical skills and competencies

Figure 2 - Key Points: Impact of CBE on Students  
163x122mm (300 x 300 DPI)

**KEY POINTS: IMPACT OF CBE ON OTHER PARTICIPANTS IN CBE****IMPACT ON GP TUTORS**

- Increased satisfaction; professional and personal development
- Teaching would be at the expense of practice commitments

**IMPACT ON PATIENTS**

- Sense of empowerment, a sense of balance in the doctor-patient relationship, and therapeutic benefit
- Some patients may react negatively to participation
- Concerns of breaching patient confidentiality

**IMPACT ON MEDICAL SCHOOL**

- Able to create more learning opportunities for students

**IMPACT ON HOSPITAL TUTORS**

- Decreased focus on hospital-based teaching

Figure 3 - Impact of CBE on Other Participants in CBE  
181x130mm (300 x 300 DPI)

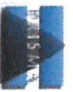

## PRISMA 2009 Checklist

| Section/topic                      | #  | Checklist item                                                                                                                                                                                                                                                                                              | Reported on page # |
|------------------------------------|----|-------------------------------------------------------------------------------------------------------------------------------------------------------------------------------------------------------------------------------------------------------------------------------------------------------------|--------------------|
| <b>TITLE</b>                       |    |                                                                                                                                                                                                                                                                                                             |                    |
| Title                              | 1  | Identify the report as a systematic review, meta-analysis, or both.                                                                                                                                                                                                                                         | 1                  |
| <b>ABSTRACT</b>                    |    |                                                                                                                                                                                                                                                                                                             |                    |
| Structured summary                 | 2  | Provide a structured summary including, as applicable: background; objectives; data sources; study eligibility criteria; participants; and interventions; study appraisal and synthesis methods; results; limitations; conclusions and implications of key findings; systematic review registration number. | 2                  |
| <b>INTRODUCTION</b>                |    |                                                                                                                                                                                                                                                                                                             |                    |
| Rationale                          | 3  | Describe the rationale for the review in the context of what is already known.                                                                                                                                                                                                                              | 3 ~ 4              |
| Objectives                         | 4  | Provide an explicit statement of questions being addressed with reference to participants, interventions, comparisons, outcomes, and study design (PICOS).                                                                                                                                                  | 4                  |
| <b>METHODS</b>                     |    |                                                                                                                                                                                                                                                                                                             |                    |
| Protocol and registration          | 5  | Indicate if a review protocol exists, if and where it can be accessed (e.g., Web address), and, if available, provide registration information including registration number.                                                                                                                               | 5<br>Table 1       |
| Eligibility criteria               | 6  | Specify study characteristics (e.g., PICOS, length of follow-up) and report characteristics (e.g., years considered, language, publication status) used as criteria for eligibility, giving rationale.                                                                                                      | 5                  |
| Information sources                | 7  | Describe all information sources (e.g., databases with dates of coverage, contact with study authors to identify additional studies) in the search and date last searched.                                                                                                                                  | 5                  |
| Search                             | 8  | Present full electronic search strategy for at least one database, including any limits used, such that it could be repeated.                                                                                                                                                                               | 5                  |
| Study selection                    | 9  | State the process for selecting studies (i.e., screening, eligibility, included in systematic review, and, if applicable, included in the meta-analysis).                                                                                                                                                   | 5                  |
| Data collection process            | 10 | Describe method of data extraction from reports (e.g., piloted forms, independently, in duplicate) and any processes for obtaining and confirming data from investigators.                                                                                                                                  | 5                  |
| Data items                         | 11 | List and define all variables for which data were sought (e.g., PICOS, funding sources) and any assumptions and simplifications made.                                                                                                                                                                       | 5                  |
| Risk of bias in individual studies | 12 | Describe methods used for assessing risk of bias of individual studies (including specification of whether this was done at the study or outcome level), and how this information is to be used in any data synthesis.                                                                                      | NA                 |
| Summary measures                   | 13 | State the principal summary measures (e.g., risk ratio, difference in means).                                                                                                                                                                                                                               | 7                  |
| Synthesis of results               | 14 | Describe the methods of handling data and combining results of studies, if done, including measures of consistency (e.g., $I^2$ ) for each meta-analysis.                                                                                                                                                   | NA                 |

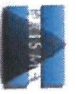

# PRISMA 2009 Checklist

| Section/topic                 | #  | Checklist item                                                                                                                                                                                           | Reported on page # |
|-------------------------------|----|----------------------------------------------------------------------------------------------------------------------------------------------------------------------------------------------------------|--------------------|
| Risk of bias across studies   | 15 | Specify any assessment of risk of bias that may affect the cumulative evidence (e.g., publication bias, selective reporting within studies).                                                             | Table 1            |
| Additional analyses           | 16 | Describe methods of additional analyses (e.g., sensitivity or subgroup analyses, meta-regression), if done, indicating which were pre-specified.                                                         | § N/A              |
| <b>RESULTS</b>                |    |                                                                                                                                                                                                          |                    |
| Study selection               | 17 | Give numbers of studies screened, assessed for eligibility, and included in the review, with reasons for exclusions at each stage, ideally with a flow diagram.                                          | Figure 1<br>5      |
| Study characteristics         | 18 | For each study, present characteristics for which data were extracted (e.g., study size, PICOS, follow-up period) and provide the citations.                                                             | 5                  |
| Risk of bias within studies   | 19 | Present data on risk of bias of each study and, if available, any outcome level assessment (see item 12).                                                                                                | N/A                |
| Results of individual studies | 20 | For all outcomes considered (benefits or harms), present, for each study: (a) simple summary data for each intervention group (b) effect estimates and confidence intervals, ideally with a forest plot. | Figures 2~3        |
| Synthesis of results          | 21 | Present results of each meta-analysis done, including confidence intervals and measures of consistency.                                                                                                  | N/A                |
| Risk of bias across studies   | 22 | Present results of any assessment of risk of bias across studies (see item 15).                                                                                                                          |                    |
| Additional analysis           | 23 | Give results of additional analyses, if done (e.g., sensitivity or subgroup analyses, meta-regression [see item 16]).                                                                                    | N/A                |
| <b>DISCUSSION</b>             |    |                                                                                                                                                                                                          |                    |
| Summary of evidence           | 24 | Summarize the main findings including the strength of evidence for each main outcome; consider their relevance to key groups (e.g., healthcare providers, users, and policy makers).                     | 12                 |
| Limitations                   | 25 | Discuss limitations at study and outcome level (e.g., risk of bias), and at review-level (e.g., incomplete retrieval of identified research, reporting bias).                                            | MB 14              |
| Conclusions                   | 26 | Provide a general interpretation of the results in the context of other evidence, and implications for future research.                                                                                  | 13                 |
| <b>FUNDING</b>                |    |                                                                                                                                                                                                          |                    |
| Funding                       | 27 | Describe sources of funding for the systematic review and other support (e.g., supply of data); role of funders for the systematic review.                                                               | N/A                |

From: Moher D, Liberati A, Tetzlaff J, Altman DG, The PRISMA Group (2009). Preferred Reporting Items for Systematic Reviews and Meta-Analyses: The PRISMA Statement. *PLoS Med* 6(6): e1000097. doi:10.1371/journal.pmed1000097

For more information, visit: [www.prisma-statement.org](http://www.prisma-statement.org).

1  
2  
3  
4  
5  
6  
7  
8  
9  
10  
11  
12  
13  
14  
15  
16  
17  
18  
19  
20  
21  
22  
23  
24  
25  
26  
27  
28  
29  
30  
31  
32  
33  
34  
35  
36  
37  
38  
39  
40  
41  
42  
43  
44  
45  
46  
47  
48  
49  
50  
51  
52  
53  
54  
55  
56  
57  
58  
59  
60
